# Supplementary material for: Non-Oncogene Addiction of KRAS-Mutant Cancers to IL-1β via Versican and Mononuclear IKKβ
Source: MDPI journal article supplement (doi:10.3390/cancers15061866), 2023-03-20
Supplement: s1 [file s1]

## Supplementary Materials for

Non-oncogene addiction of *KRAS*-mutant cancers to IL-1 $\beta$  via versican and mononuclear IKK $\beta$

Magda Spella, Giannoula Ntaliarda, Georgios Skiadas, Anne-Sophie Lamort, Malamati Vreka, Antonia Marazioti, Ioannis Lilis, Eleni Bouloukou, Georgia A. Giotopoulou, Mario A.A. Pepe, Stefanie A.I. Weiss, Agnese Petrera, Stefanie M. Hauck, Ina Koch, Michael Lindner, Rudolph A. Hatz, Juergen Behr, Kristina A.M. Arendt, Ioanna Giopanou, David Brunn, Rajkumar Savai, Dieter E. Jenne, Maarten de Chateau, Fiona E. Yull, Timothy S. Blackwell, and Georgios T. Stathopoulos

Correspondence to: [magsp@upatras.gr](mailto:magsp@upatras.gr)

### **This PDF file includes:**

Figures S1 to S17  
Tables S1 to S5  
Caption for Data S1

### **Other Supplementary Materials for this manuscript include the following:**

Data S1 [Excel file of proteomic analysis of secreted proteins of *Kras*-mutant and -wild-type cancer cells]

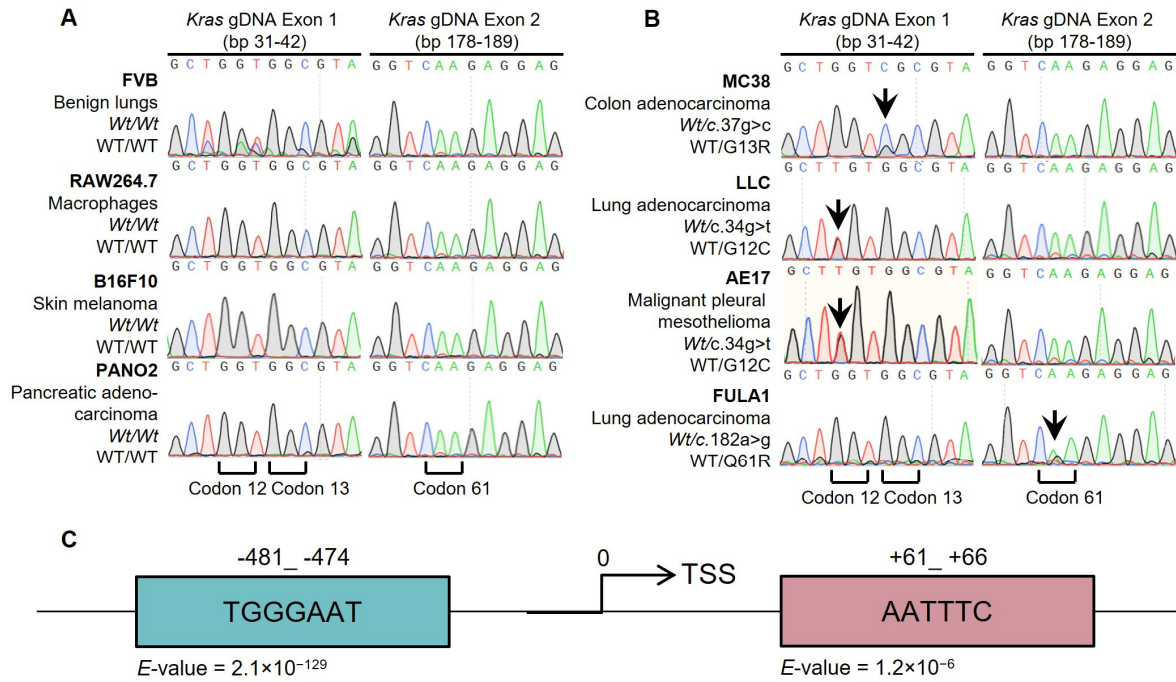

**Figure S1.** Seven murine cell lines with different *Kras* alleles and transcriptional control of interleukin (IL)-1 $\beta$  by nuclear factor (NF)- $\kappa$ B. (A,B) Sanger sequencing traces for *Kras* codons 12, 13, and 61 of all cell lines used. Arrows point to *Kras* mutations: MC38 cells carry G13R, LLC and AE17 cells G12C, FULA1 cells Q61R (B), and all other cell lines wild-type (*Wt*/WT; A) *Kras* alleles. Note that all mutant *Kras* alleles are in heterozygosity to *Wt* alleles. (C) *IL1B* as a NF- $\kappa$ B target gene in ChIPseq datasets from the CHEA Transcription Factor Targets dataset (<https://maayanlab.cloud/Harmonizome/dataset/CHEA+Transcription+Factor+Targets>). We downloaded the RELA (red) and RELB (blue) binding sequence motifs from the ENCODE portal (<https://www.encodeproject.org/>) with the identifiers: ENCFF507YCV (CHIP-seq on HuH-7.5 cells) and ENCFF615HZF (CHIP-seq on 8988T cells), respectively. E-value represents the statistical significance of the motif in terms of probability to be found in similarly sized set of random sequences. TSS: Transcription Start Site.

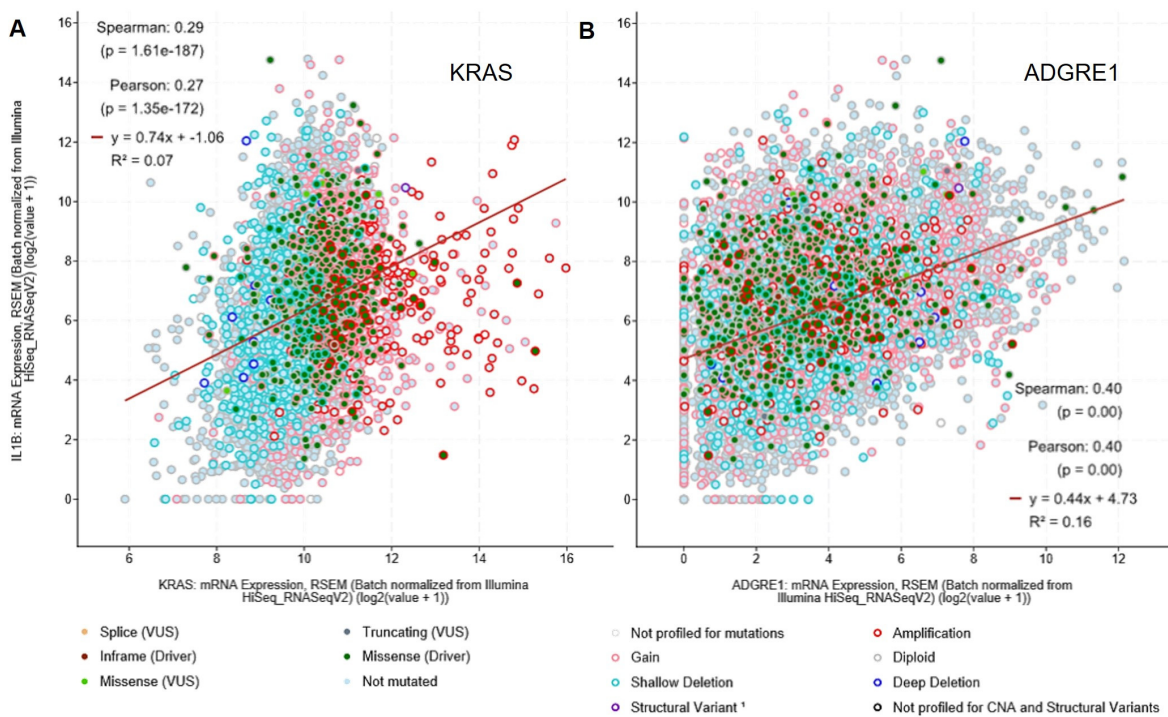

**Figure S2.** Expression of *IL1B* in correlation with *KRAS* and the macrophage marker *ADGRE1* in human tumors. Gene expression data from the cancer genome atlas (TCGA) pan-cancer dataset ( $n = 10,071$  patients). Correlations of *IL1B* with *KRAS* (**A**) and the macrophage marker *ADGRE1* (encoding F4/80) (**B**) mRNA levels. Shown are raw data points (circles) color-coded by *KRAS* alteration status, regression lines and formulas (lines), as well as Spearman's and Pearson's correlation coefficients with probabilities ( $P$ ) and squared correlation coefficients ( $R^2$ ). Data from <https://www.cbioportal.org/>.

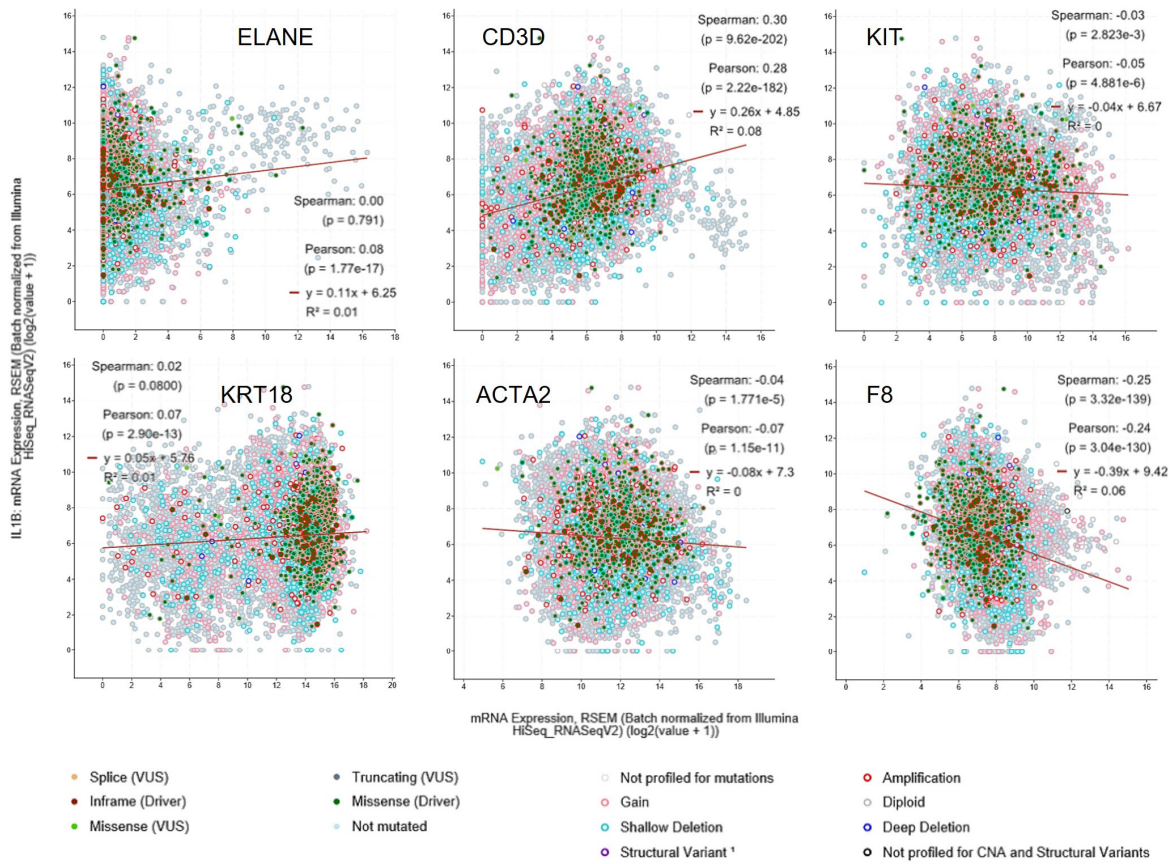

**Figure S3.** Expression of *IL1B* in correlation with lineage-specific markers in human tumors. Gene expression data from the cancer genome atlas (TCGA) pan-cancer dataset ( $n = 10,071$  patients). Correlations between mRNA levels of *IL1B* and the neutrophil marker *ELANE* (top left; encoding neutrophil elastase), the pan-lymphocyte marker *CD3D* (top middle; encoding cluster of differentiation 3), the mast cell marker *KIT* (top right; encoding c-KIT), the cancer cell marker *KRT18* (bottom left; encoding cytokeratin 18), the fibroblast marker *ACTA2* (bottom middle; encoding  $\alpha$ -smooth muscle actin), and the endothelial marker *F8* (bottom right; encoding factor VIII). Shown are raw data points (circles) color-coded by *KRAS* alteration status, regression lines and formulas (lines), as well as Spearman's and Pearson's correlation coefficients with probabilities ( $P$ ) and squared correlation coefficients ( $R^2$ ). Data from <https://www.cbiportal.org/>.



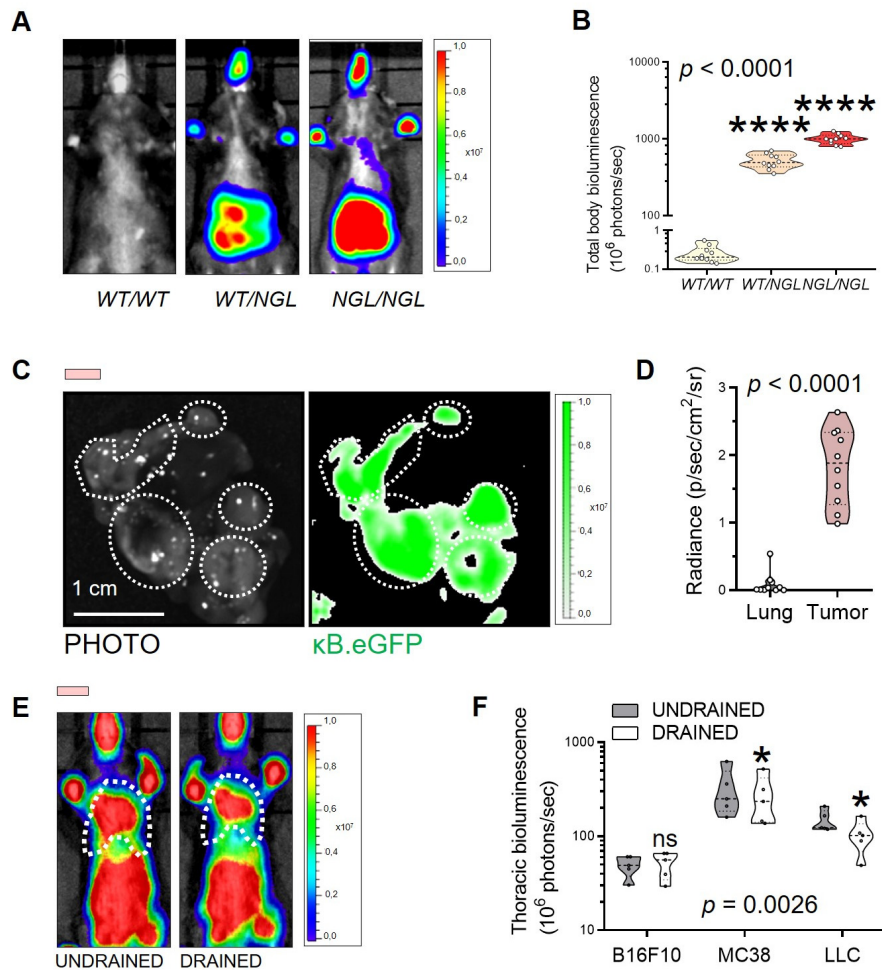

**Figure S4.** NF- $\kappa$ B activation in pleural metastases of *NGL* mice. (**A**, **B**) Representative photographic/bioluminescent images with pseudocolor scale (**A**) and data summary (**B**) from wild-type (*WT/WT*), heterozygote (*WT/NGL*), and homozygote (*NGL/NGL*) *NF- $\kappa$ B.eGFP.LUC* reporter mice at 5 min post-retroorbital injection of 1 mg D-Luciferin. Sample size ( $n$ ) = 10/group;  $P$ , probability, one-way ANOVA; \*\*\*\*,  $P < 0.0001$  compared with *WT/WT* mice, Bonferroni post-test. (**C**, **D**) Representative photographic/biofluorescent (**C**) images with pseudocolor scale and data summary (**D**) of  $\kappa$ B.eGFP reporter signal (green) of lung explants of *NGL* mice at 14 days post-pleural injection of  $2 \times 10^5$  Lewis lung carcinoma (LLC) cells. Note the NF- $\kappa$ B reporter signal ( $\kappa$ B.eGFP) over pleural tumors (outlines).  $n = 10$ /group;  $P$ ,

probability, unpaired Student's t-test. **(E, F)** Representative photographic/bioluminescent image overlays with pseudocolor scale **(E)** and results summary **(F)** of chest bioluminescence of *NGL* mice with metastatic malignant pleural effusions at 14 days post-pleural injection of  $2 \times 10^5$  B16F10 skin melanoma, MC38 colon adenocarcinoma, or LLC cells before (undrained) and after (drained) pleural catheter insertion and fluid removal.  $n = 5/\text{group}$ ;  $P$ , probability, repeated measures two-way ANOVA; ns and \*,  $P > 0.05$  and  $P < 0.05$ , respectively, for pre-post drainage comparison. Data in **(B,D,F)** are given as raw data (circles), median and quartiles (lines), and kernel density distributions (violin plots).

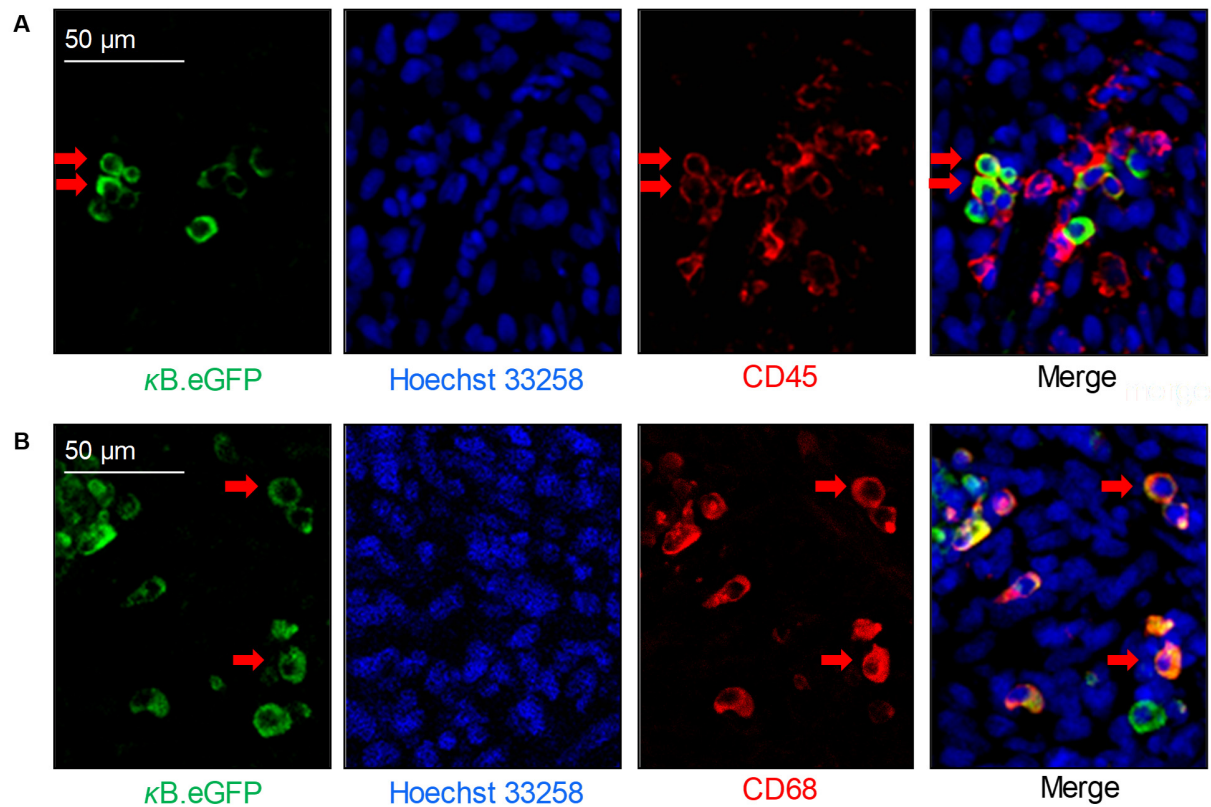

**Figure S5.** NF- $\kappa$ B activation in pleural metastases of *NGL* mice. Pleural metastases from mice treated as in Figure S4C,D show endogenous  $\kappa$ B.eGFP reporter signal (green) that co-localizes with the pan-hematopoietic marker CD45 (A) and the macrophage marker CD68 (B) (both red fluorescent) in tumor-infiltrating myeloid cells and macrophages (arrows). Blue, nuclear Hoechst 33258 counterstaining.

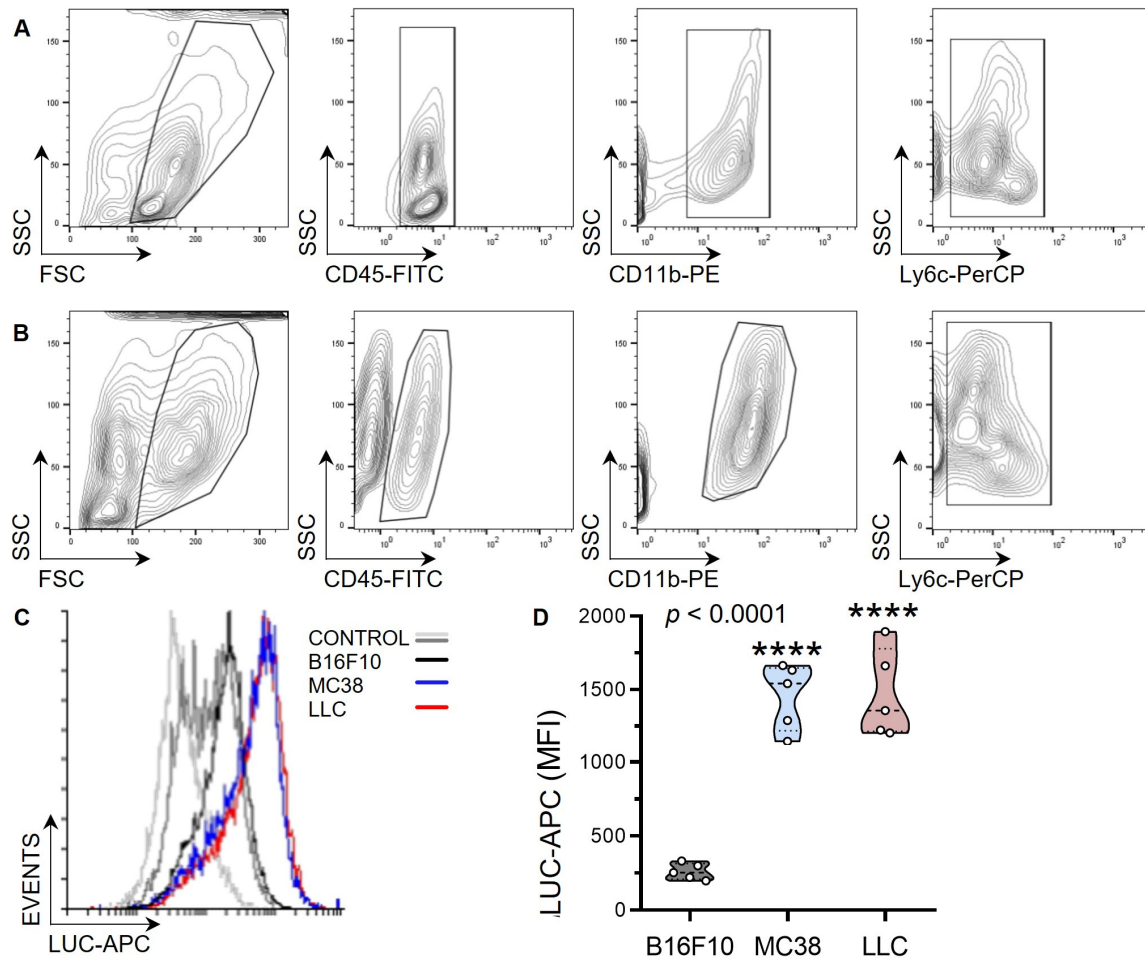

**Figure S6.** NF-κB activation in metastasis-associated macrophages. *NGL* NF-κB reporter mice received pleural PBS or DMEM (controls), or  $2 \times 10^5$  B16F10 skin melanoma, MC38 colon adenocarcinoma, or Lewis lung carcinoma (LLC) cells and were sacrificed 14 days thereafter. Pleural fluid and pleural tumor cells were stained with antibodies against the hematopoietic marker CD45, myeloid markers CD11b and Ly6c, and the endogenous κB.LUC reporter. Representative flow cytometric dotplots showing the sequential gating strategy for macrophages of pleural fluid (A) and of tumors (B), and histogram (C) and data summary (D) of κB.LUC reporter signal in pleural macrophages. Data in (D) are given as raw data (circles), median and quartiles (lines), and kernel density distributions (violin plots). Sample size ( $n$ ) = 5/group;  $P$ , probability, one-way ANOVA; \*\*\*\*,  $P < 0.0001$  compared with mice injected with B16F10 cells, Bonferroni post-tests. MFI, mean fluorescence intensity.

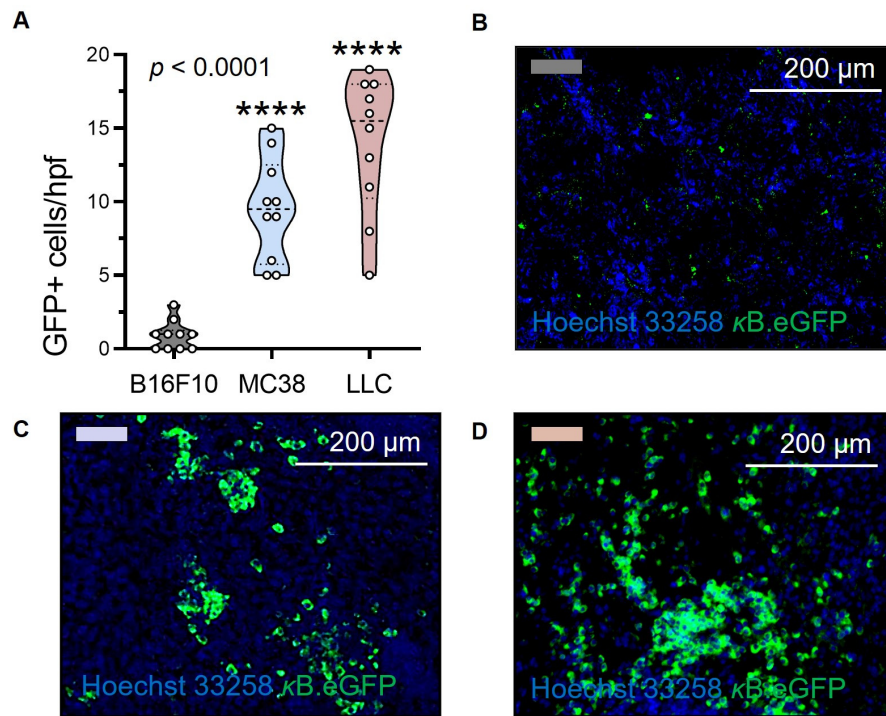

**Figure S7.** NF- $\kappa$ B activation in metastasis-associated macrophages. *NGL* NF- $\kappa$ B reporter mice received  $2 \times 10^5$  pleural B16F10 skin melanoma, MC38 colon adenocarcinoma, or Lewis lung carcinoma (LLC) cells and were sacrificed 14 days thereafter. Pleural tumors were assessed for  $\kappa$ B.eGFP reporter signal by fluorescent microscopy after nuclear counterstaining with Hoechst 33258. Data summary (A) and representative merged microscopy images (B–D) of  $\kappa$ B.eGFP+ pleural tumor cells. Data in (A) are given as raw data (circles), median and quartiles (lines), and kernel density distributions (violin plots). Sample size ( $n$ ) = 10/group;  $P$ , probability, one-way ANOVA; \*\*\*\*,  $P < 0.0001$  compared with mice injected with B16F10 cells, Bonferroni post-tests. hpf, high power field.



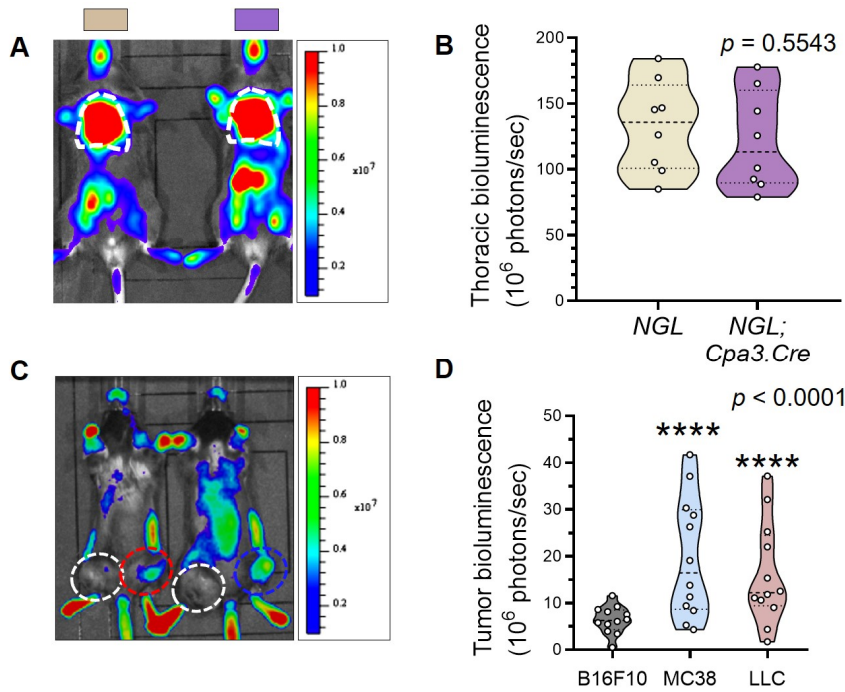

**Figure S8.** No impact of mast cells on the host NF- $\kappa$ B response to pleural metastasis and decreased intensity of the host NF- $\kappa$ B response to heterotopic tumor growth. **(A-B)** Representative photographic/bioluminescent image overlays with pseudocolor scale **(A)** and summary of results **(B)** from *NGL* mice additionally carrying no (*NGL*) or one (*NGL;Cpa3.Cre*) *Cpa3.Cre* allele that renders them, respectively, mast cell-competent or -deficient. Images and data were obtained at 14 days post-pleural injection of  $2 \times 10^5$  Lewis lung carcinoma (LLC) cells, 5 min post-retroorbital injection of 1 mg D-Luciferin. Sample size ( $n$ ) = 8/group;  $P$ , probability, unpaired Student's t-test. **(C-D)** Representative photographic/bioluminescent image overlays with pseudocolor scale **(C)** and summary of results **(D)** from *NGL* mice at 21 days post-subcutaneous injection of  $5 \times 10^5$  B16F10 skin melanoma (white circles), MC38 colon adenocarcinoma (blue circles), or LLC (red circles) cells, 5 min post-retroorbital injection of 1 mg D-Luciferin.  $n$  = 12/group;  $P$ , probability, one-way ANOVA; \*\*\*\*,  $P$  < 0.0001 compared with B16F10 cells, Bonferroni post-tests. Data in (B, D) are given as raw data (circles), median and quartiles (lines), and kernel density distributions (violin plots).

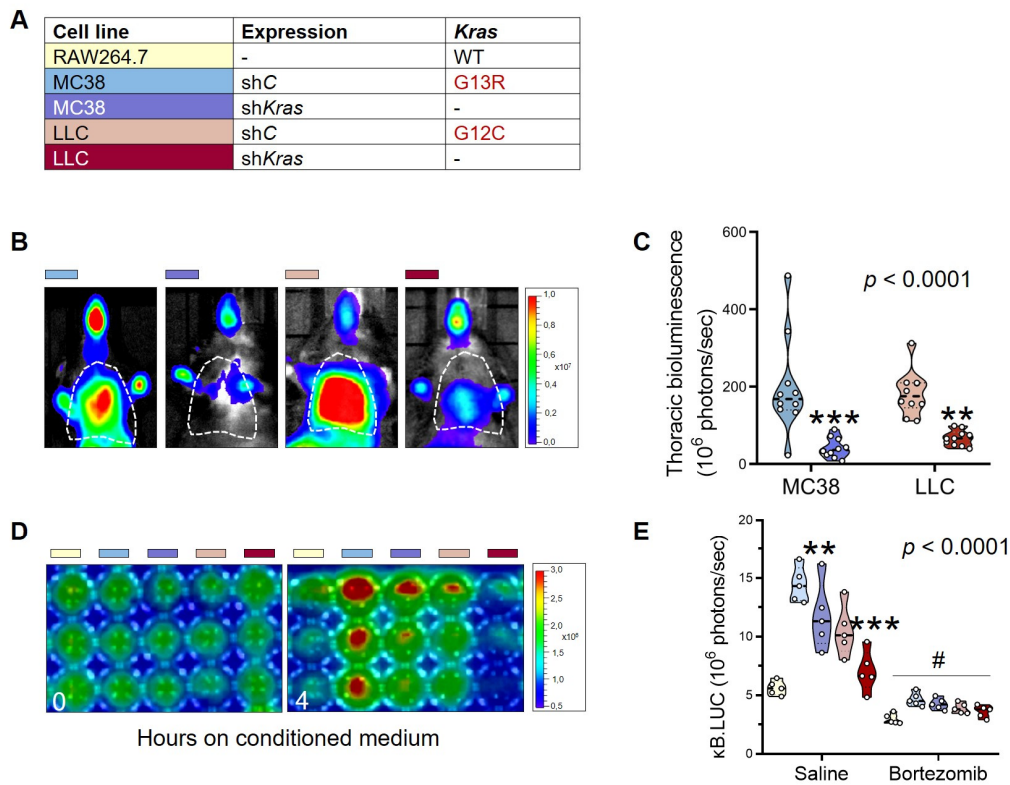

**Figure S9.** Requirement for mutant *Kras* signaling for host NF- $\kappa$ B activation during pleural metastasis. (A) Tumor cells with *Kras* mutations (MC38 and LLC cells) were engineered to stably express shRNA encoding random control (shC) or anti-*Kras*-specific (sh*Kras*) sequences. *Kras*-wild-type RAW264.7 myelomonocytic leukaemia cells served as controls. Shown are color-coded tumor cell lines used with shRNA expression and *Kras* mutation status. (B, C) Tumor cells were injected into the pleural space of NGL mice ( $5 \times 10^5$ /mouse). (D, E) RAW264.7 macrophages expressing pNGL plasmid were pretreated with saline or the proteasome and NF- $\kappa$ B inhibitor bortezomib ( $1 \mu\text{g/mL}$  equivalent to  $3 \mu\text{M}$ ), and were subsequently incubated with tumor-conditioned media (1:1 dilution in DMEM). Shown are representative photographic/bioluminescent images with pseudocolor scale (B, D) and results summaries of chest bioluminescence of NGL mice at 14 days post-tumor cells (C), and of cellular bioluminescence of pNGL RAW264.7 macrophages at 4 hours post-tumor-conditioned media (E). (C)  $n = 10$ /group; (E)  $n = 5$  independent experiments/group;  $P$ , probability, two-way ANOVA; \*\* and \*\*\*,  $P < 0.01$  and  $P < 0.001$ , respectively, compared with shC; #,  $P < 0.05$  compared with the respective saline-pretreated cells. Data in (C, E) are given as raw data (circles), median and quartiles (lines), and kernel density distributions (violin plots).

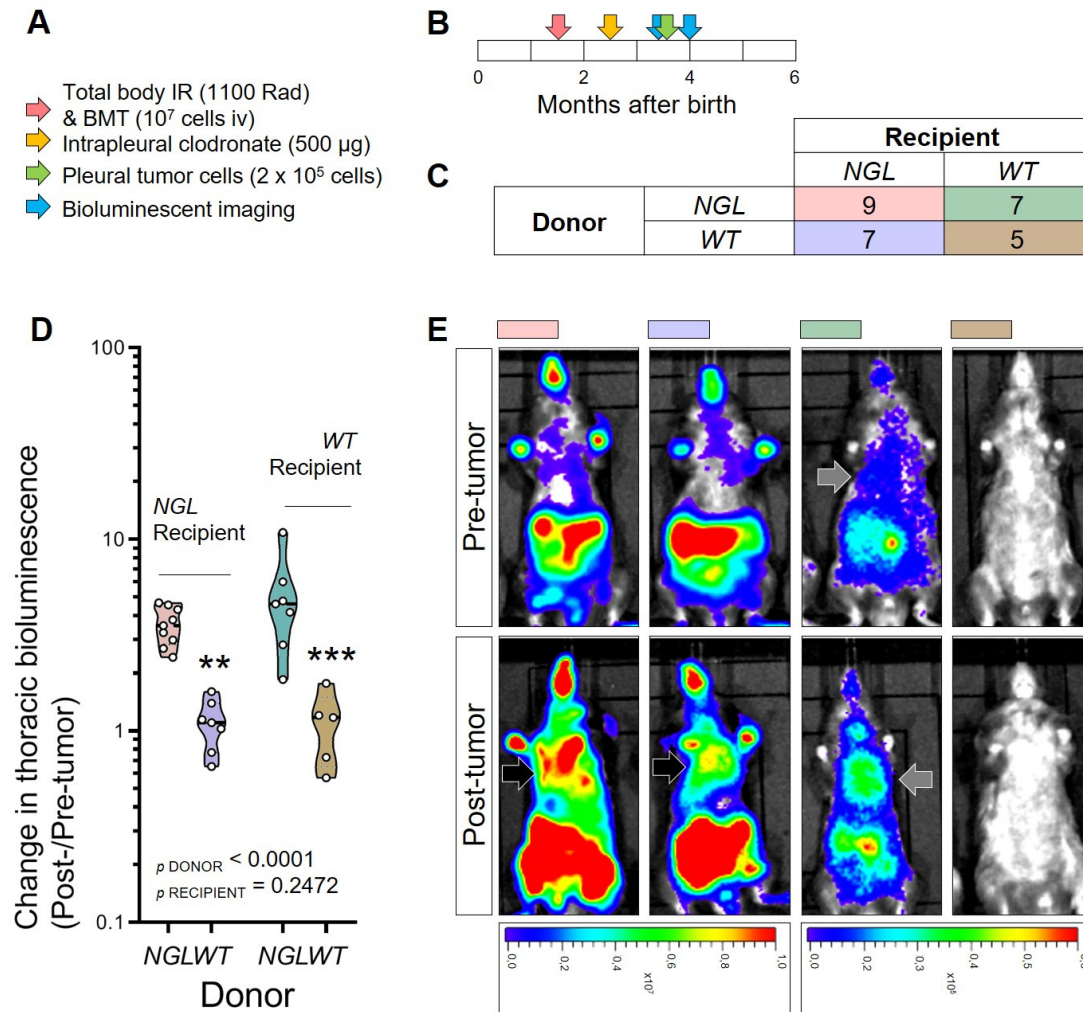

**Figure S10.** Adoptive bone marrow transplants determine host NF- $\kappa$ B response to pleural metastasis. *NF- $\kappa$ B.eGFP.LUC* reporter (NGL) and wild-type (WT) recipients received total-body irradiation (1100 Rad) followed by adoptive bone marrow replacement (BMT) from WT and NGL donors. After one month required for bone marrow chimerism, 500  $\mu$ g liposomal clodronate was administered intrapleurally. After yet another month required for replacement of pleural myeloid cells by transplanted bone marrow cells, mice received  $2 \times 10^5$  intrapleural LLC cells and were imaged for bioluminescence after 14 days. Shown are experimental schematic (each box represents one postnatal month) (A, B), color-coded table with experimental groups and sample size (n) (C), results summary (D), and representative photographic/bioluminescent images with pseudocolor scale taken at 5 min post-retroorbital injection of 1 mg D-Luciferin (E).

Data in (D) are given as raw data (circles), median and quartiles (lines), kernel density distributions (violin plots), and probability values ( $P$ ), two-way ANOVA. \*\* and \*\*\*,  $P < 0.01$  and  $P < 0.001$ , respectively, compared with mice that received BMT from *NGL* donors, Bonferroni post-tests.

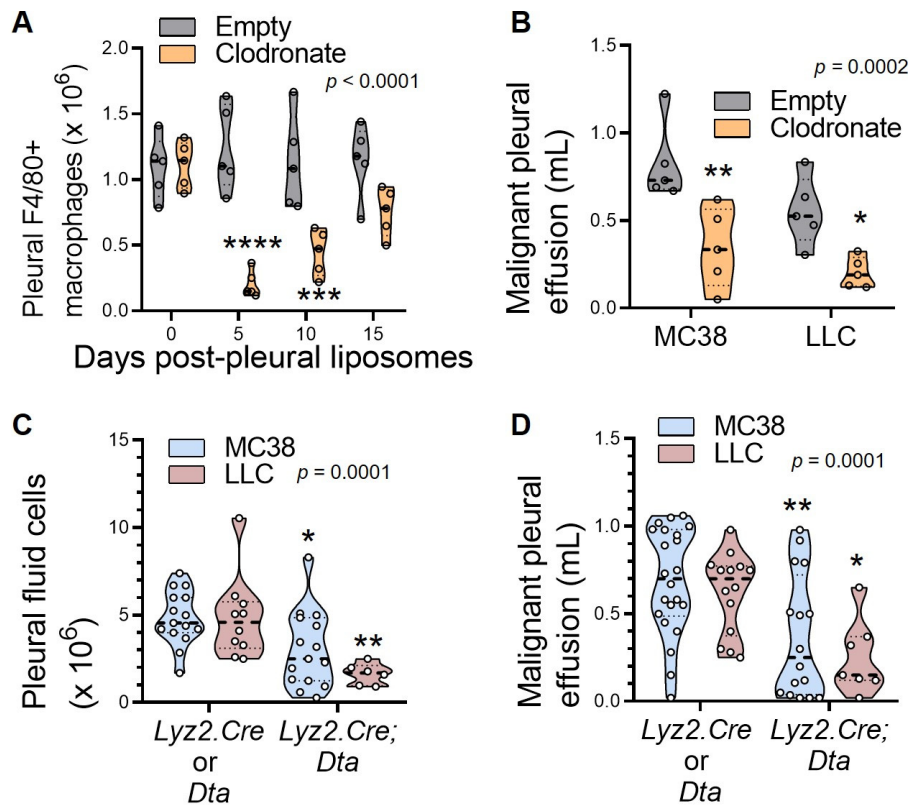

**Figure S11.** Pharmacologic and genetic macrophage ablation abolishes pleural metastasis. **(A)** *C57BL/6* mice ( $n = 5$  mice/treatment/time-point) received intrapleural liposomal clodronate or empty liposomes (500  $\mu$ g/mouse) and were subjected to pleural lavage at different time-points post-clodronate for analysis of macrophage numbers expressing F4/80 (encoded by *Adgre1*, the mouse orthologue of human *ADGRE1* from Fig. S1).  $P$ , probability, two-way ANOVA; \*\*\* and \*\*\*\*,  $P < 0.001$  and  $P < 0.0001$ , respectively, compared with empty liposomes, Bonferroni post-test. **(B)** Pleural fluid volume of *C57BL/6* mice at 15 days post-intrapleural delivery of 500  $\mu$ g liposomal clodronate or empty liposomes followed by  $2 \times 10^5$  intrapleural MC38 or LLC cells one day thereafter and 500  $\mu$ g liposomal clodronate or empty liposome re-administration into the pleural space 3 days later.  $n = 5$  mice/group;  $P$ , probability, two-way ANOVA; \* and \*\*,  $P < 0.05$  and  $P < 0.01$ , respectively, compared with empty liposomes, Bonferroni post-tests. **(C, D)** Pleural fluid nucleated cell number **(C)** and malignant pleural effusion volume **(D)** of *C57BL/6* mice carrying either one or both *Lyz2.Cre* and *Dta* alleles, at 14 days post-intrapleural delivery

of  $2 \times 10^5$  MC38 or LLC cells.  $n = 22, 14, 16,$  and  $7$  mice/group from left to right;  $P$ , probability, two-way ANOVA; \* and \*\*,  $P < 0.05$  and  $P < 0.01$ , respectively, for *Lyz2.Cre;Dta* macrophage-deficient mice compared with single transgenic controls, Bonferroni post-tests. All data are shown as raw data (circles), median and quartiles (lines), and kernel density distributions (violin plots).

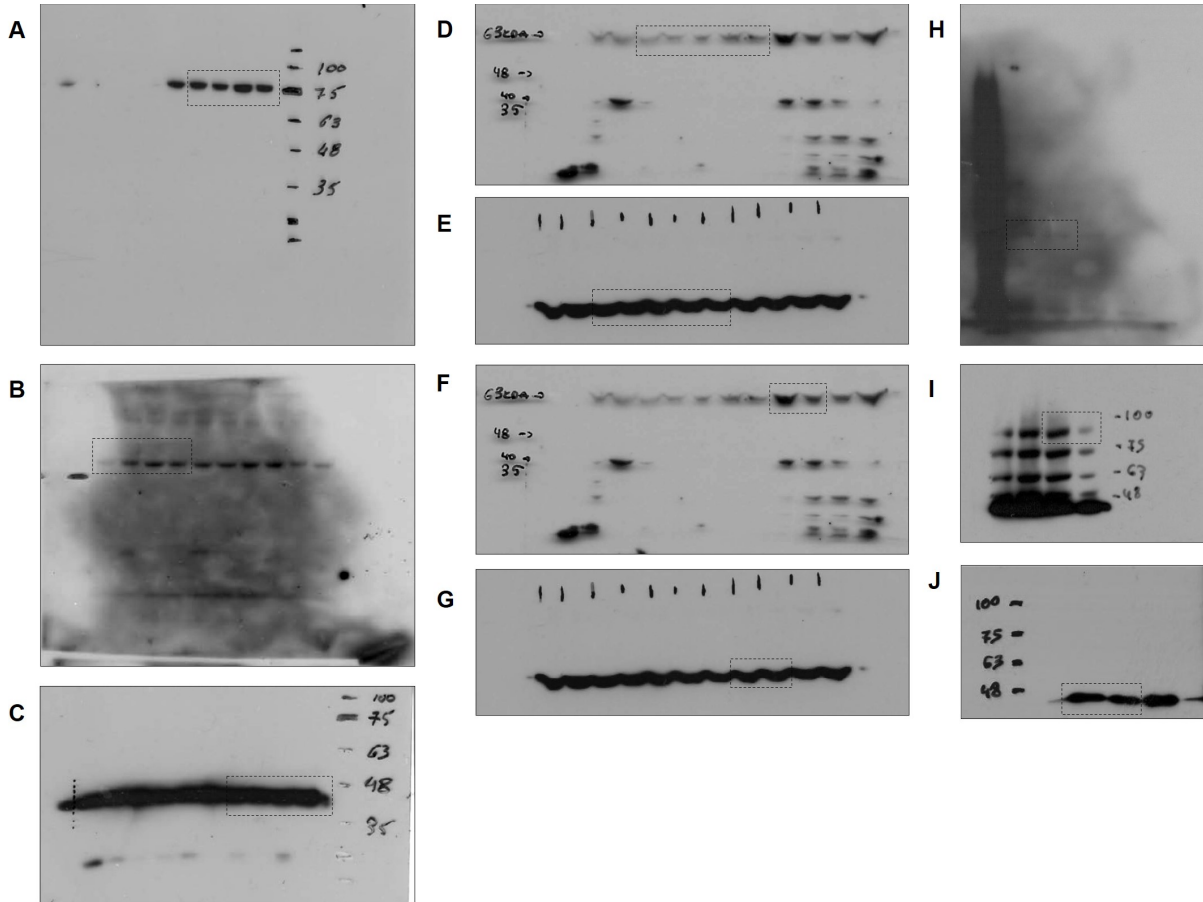

**Figure S12.** Uncropped immunoblots. Shown are uncropped immunoblots with areas displayed in main figures (dashed rectangles). (A-C) Blots shown in Figure 3C including IKKα (A), IKKβ (B), and β-actin (C). (D, E) Inverted blots shown in Figure 4E including versican (VCAN; D) and α-tubulin (TUBA; E). (F-H) Inverted blots shown in Figure 4H including IKKα (H), IKKβ (F), and β-actin (G). (I, J) Inverted blots shown in Figure 4I including VCAN (I) and TUBA (J).



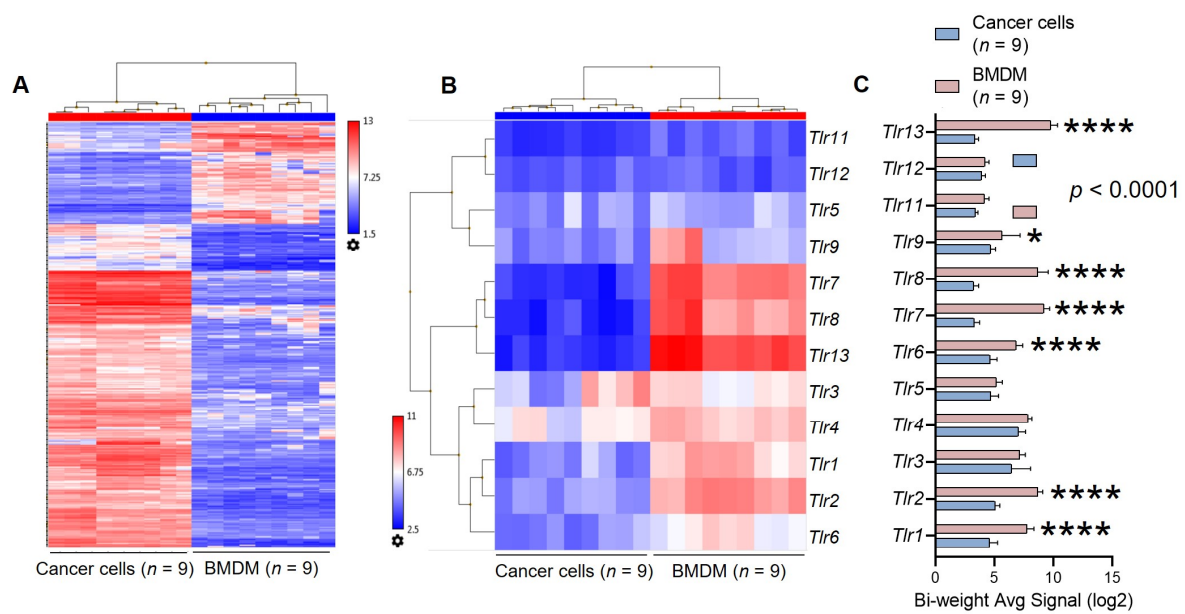

**Figure S13.** Toll-like receptor (TLR) expression by murine bone marrow-derived macrophages (BMDM) by microarray. Murine BMDM from *C57BL/6* mice were isolated from whole bone marrow cells using one-week exposure to 20 ng/mL macrophage colony-stimulating factor (M-CSF). Total cellular RNA was extracted from BMDM under various conditions, as well as from different cancer cell lines ( $n = 9/\text{group}$ ) and was hybridized to Affymetrix Mo Gene ST2.0 microarrays (data from GEO datasets GSE94847, GSE94880, GSE130624, and GSE130716). Shown are unsupervised clustering by all differentially expressed genes (A) and by TLR genes (B), as well as results summary for TLR gene expression (C). Data in (C) are shown as mean with SD;  $P$ , probability, two-way ANOVA; \* and \*\*\*\*,  $P < 0.05$  and  $P < 0.0001$ , respectively, compared with cancer cells, Bonferroni post-tests. Microarrays compared were GSM3744950, GSM3744952, GSM3744954, GSM3744955, GSM3744958, GSM3744961, GSM3744962, GSM3744957, and GSM3744960 (cancer cells) versus GSM2486425, GSM2486426, GSM2487750, GSM2487751, GSM3752396, GSM3752397, GSM3752398, GSM3752399, and GSM3752400 (BMDM).

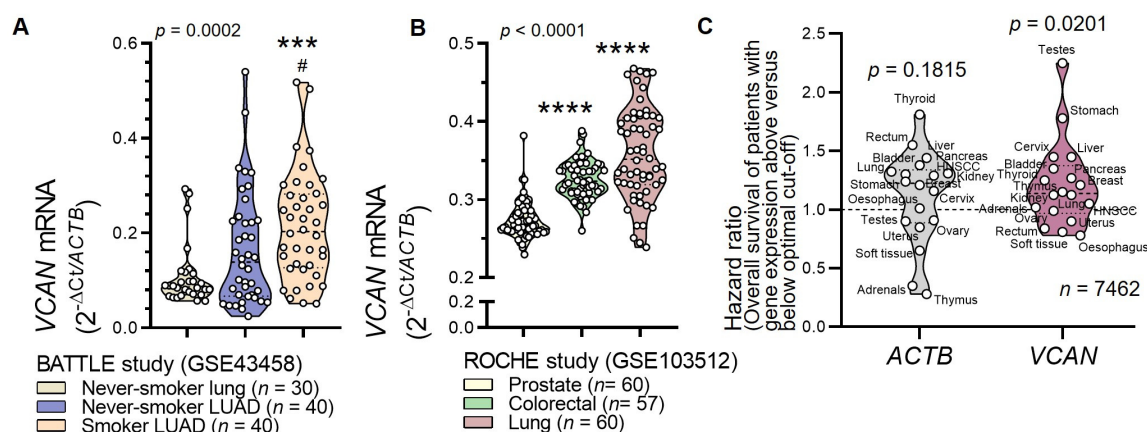

**Figure S14.** Versican as a potential diagnostic and prognostic biomarker of *KRAS*-mutant human cancers. **(A, B)** Data summary of *VCAN* expression normalized by *ACTB* transcripts in various human cancer types with different *KRAS* mutation frequencies (*KRAS*<sup>MUT%</sup>; data from COSMIC; <https://cancer.sanger.ac.uk/cosmic>). **(A)** *VCAN/ACTB* expression in GEO dataset GSE43458 that encompasses lung adenocarcinomas (LUAD) from smokers (*KRAS*<sup>MUT%</sup> = 36.5%) and never-smokers (*KRAS*<sup>MUT%</sup> = 11.8%), as well as normal lung tissues from never-smokers (*KRAS*<sup>MUT%</sup> < 1.0%). **(B)** *VCAN/ACTB* expression in GEO dataset GSE103512 that encompasses prostate (*KRAS*<sup>MUT%</sup> = 2.8%), colorectal (*KRAS*<sup>MUT%</sup> = 32.4%), and lung (*KRAS*<sup>MUT%</sup> = 14.9%) cancers. **(A, B)**  $n$ , sample size;  $P$ , probability, one-way ANOVA; \*\*\* and \*\*\*\*,  $P < 0.001$  and  $P < 0.0001$ , respectively, compared with lung tissue from never-smokers **(A)** or prostate cancer **(B)**; #,  $P < 0.05$  compared with LUAD from never-smokers, Bonferroni post-tests. **(C)** Kaplan-Meier survival analyses from all patients within the KMplot database stratified by *VCAN* transcript expression by optimal cut-offs (data from KMplot; [http://kmplot.com/analysis/index.php?p=service&cancer=pancancer\\_rnaseq](http://kmplot.com/analysis/index.php?p=service&cancer=pancancer_rnaseq)). Shown is summary of hazard ratios (HR) obtained for *VCAN* and *ACTB* control expression for 7,462 patients with 18 different tumor types.  $P$ , probability, one-sample Wilcoxon test for comparison with HR = 1.0. All data are shown as raw data (circles), median and quartiles (lines), and kernel density distributions (violin plots).

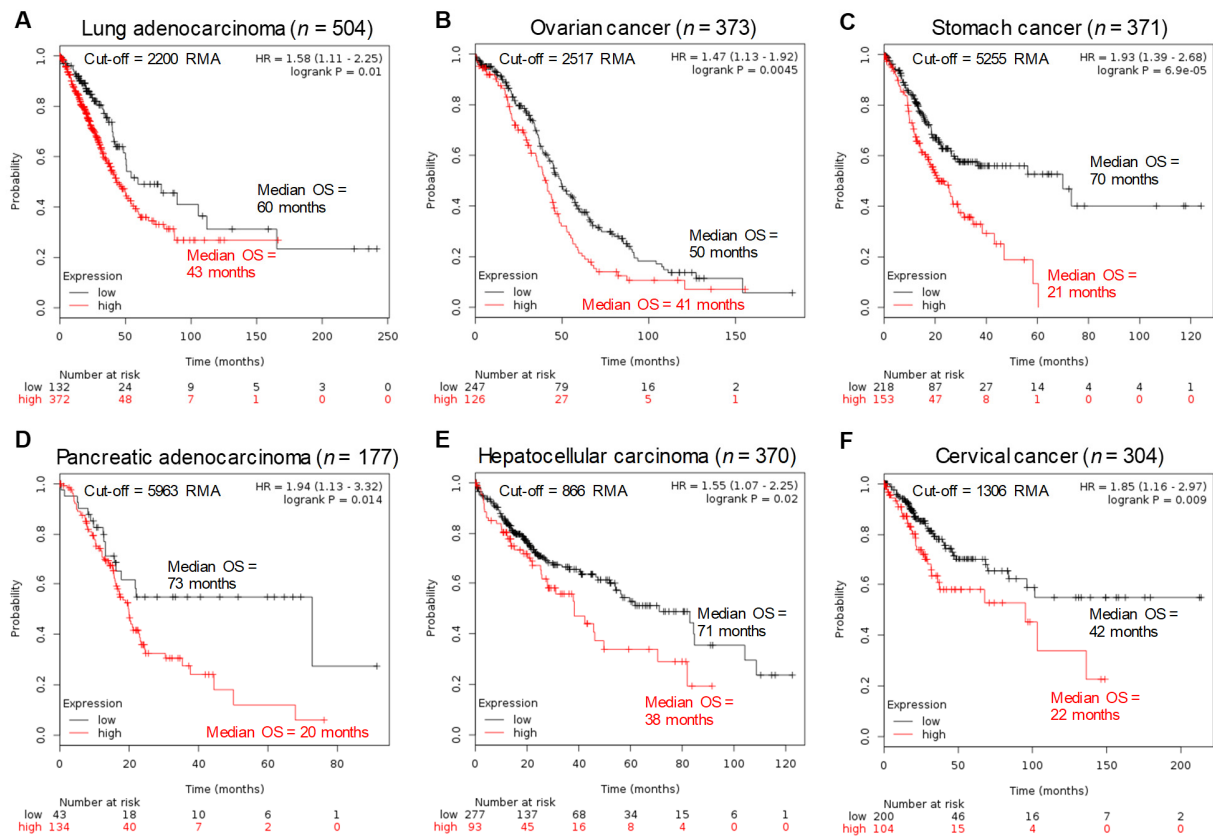

**Figure S15.** Versican over-expression by *KRAS*-mutant human cancers predicts poor survival. Kaplan-Meier survival plots with median overall survival (OS), hazard ratios (HR) with 95% confidence interval, and univariate log-rank probability values (*P*) from 504 patients with lung adenocarcinoma (A), 373 with ovarian cancer (B), 371 with stomach cancer (C), 177 with pancreatic cancer (D), 370 with liver cancer (E), and 304 with cervical cancer (F), stratified into low (black) and high (red) *VCAN* transcript expression by the optimal cut-offs indicated. RMA, robust microarray average (data from KMplot; [http://kmplot.com/analysis/index.php?p=service&cancer=pancancer\\_rnaseq](http://kmplot.com/analysis/index.php?p=service&cancer=pancancer_rnaseq)).

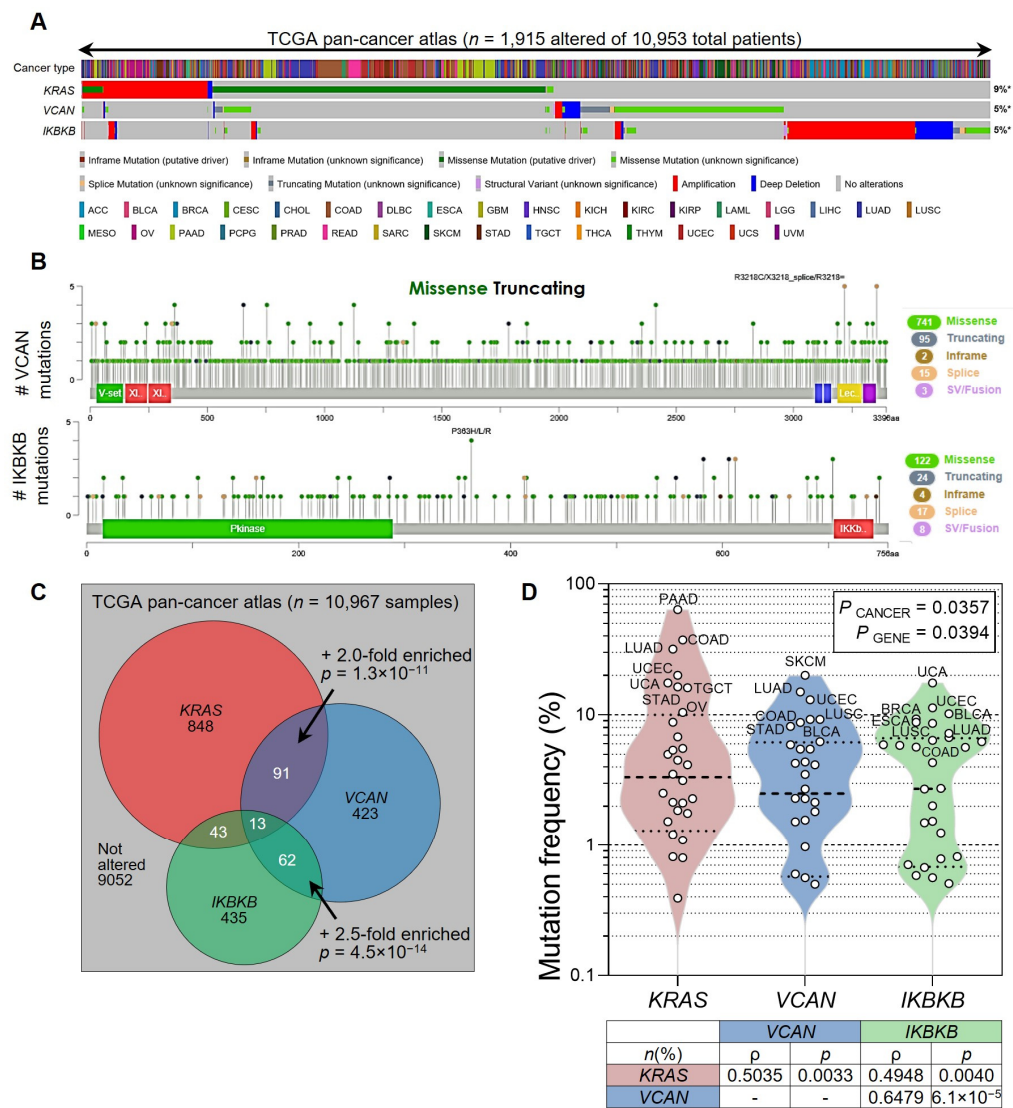



**Figure S16.** *KRAS*, *VCAN*, and *IKBKB* alterations in human cancers. *KRAS*, *VCAN*, and *IKBKB* mutation frequencies in the cancer genome atlas (TCGA) pan-cancer dataset ( $n = 10,967$  samples from 10,953 patients). Data are from <https://www.cbiportal.org/> (link: <https://bit.ly/3yGys8i>). Shown are mutation plot with alteration frequencies (A), lollipop plots (B), co-occurrence Venn diagram (C), and most frequently altered tumor types (D). In (A), columns represent patients and rows genes. In (C), shown are sample numbers ( $n$ ).  $P$ , probability, hypergeometric test. In (D), shown are raw data points (circles), rotated kernel density distributions (violins), medians (dashed lines), quartiles (dotted lines), top quartile-altered cancer types with  $P$ , two-way ANOVA, and Spearman's correlation coefficients ( $\rho$ ) and  $P$  across 32 cancer types. TCGA acronyms are from <https://gdc.cancer.gov/resources-tcga-users/tcga-code-tables/tcga-study-abbreviations>. Note the alteration enrichment (addition) of *VCAN* to *KRAS* and of *IKBKB* to *VCAN* along the pathway proposed here. Note also that lung adenocarcinoma (LUAD), colon adenocarcinoma (COAD), and uterine corpus endometrial carcinoma (UCEC) are among the top 25% mutated cancers for all three genes and among the most frequent cancer types to metastasize to the pleural space.

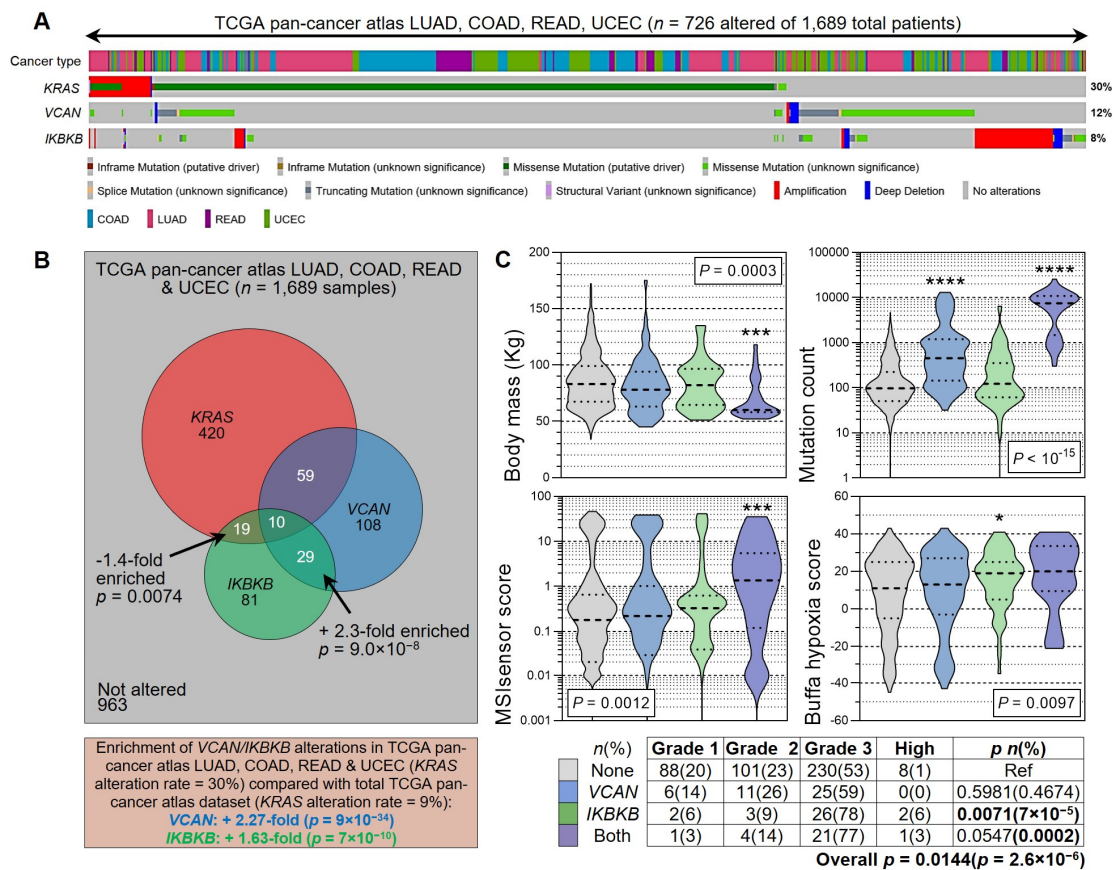

**Figure S17.** *VCAN* and *IKBKB* alterations in lung adenocarcinoma (LUAD), colon adenocarcinoma (COAD), rectal adenocarcinoma (READ), and uterine corpus endometrial carcinoma (UCEC). *KRAS*, *VCAN*, and *IKBKB* mutation frequencies in the cancer genome atlas (TCGA) LUAD, COAD, READ, and UCEC datasets ( $n = 1,689$  samples/patients). Data are from <https://www.cbioportal.org/> and can be retrieved at <https://bit.ly/3wzrbFF>. Shown are mutation plot with alteration frequencies (A), co-occurrence Venn diagram (B), and features of altered versus unaltered patients (C). In (A), columns represent patients and rows genes. In (B), shown are sample numbers ( $n$ ),  $P$ , probability, hypergeometric test. In (C), shown are rotated kernel density distributions (violins), medians (dashed lines), quartiles (dotted lines), and UCEC patient numbers ( $n$ ) and percentages (%). TCGA acronyms are from <https://gdc.cancer.gov/resources-tcga-users/tcga-code-tables/tcga-study-abbreviations>.  $P$ , probability, Kruskal-Wallis test (graphs) or overall and paired  $\chi^2$  tests for patient numbers and percentages before and in parentheses (table). \*, \*\*\*, and \*\*\*\*:  $P < 0.05$ ,  $P < 0.001$ , and  $P < 0.0001$  compared with none-altered patients, Dunn's post-tests. In (B), note the alteration enrichment (oncogene addiction) of *IKBKB* to *VCAN* and the oncogene repulsion of *IKBKB* to *KRAS*. Note also the significant enrichment of *VCAN* and *IKBKB* alterations in the selected highly *KRAS*-mutant tumor types. In (C), note that *VCAN*-, *IKBKB*-, and *VCAN/IKBKB*-altered patients display varying degrees of cachexia (not recorded for LUAD), hypermutation, microsatellite instability (MSI), hypoxia, and advanced tumor grade.

**Table S1. Differential gene expression of BMDM-specific transcripts after incubation with tumour-conditioned media.** Transcripts statistically significantly (overall ANOVA  $P < 0.05$ ) over-represented  $> 5$ -fold in bone marrow-derived macrophages (BMDM) compared with MC38 and LLC cancer cells and induced  $> 5$ -fold in BMDM after incubation with MC38 and LLC cell-conditioned media (CM), as assessed by microarray (mouse Gene ST2.0, Affymetrix, Sta.Clara, CA). Note the significant induction of *Il1b* shaded grey. Microarrays compared were GSM3744950, GSM3744952, GSM3744954, GSM3744955, and GSM3744958 (cancer cells) versus GSM2486425, GSM2487750, GSM3744964, GSM3752400, and GSM2486426 (naïve BMDM) versus GSM3752396, GSM3752397, GSM3752398, GSM3752399, and GSM2487751 (tumor-conditioned BMDM).

| Gene symbol   | Gene name                                        | $\Delta GE^a$ | $\Delta GE^b$ | ANOVA $p^c$ |
|---------------|--------------------------------------------------|---------------|---------------|-------------|
| <i>Il1b</i>   | interleukin 1 beta                               | 7.83          | 69.57         | 0.02770     |
| <i>Mmp8</i>   | matrix metalloproteinase 8                       | 7.43          | 38.33         | 0.00002     |
| <i>Irg1</i>   | immunoresponsive gene 1                          | 7.09          | 25.92         | 0.01569     |
| <i>Pf4</i>    | platelet factor 4                                | 7.77          | 23.76         | 0.00101     |
| <i>Bst1</i>   | bone marrow stromal cell antigen 1               | 5.21          | 21.62         | 0.00018     |
| <i>Ccl12</i>  | chemokine (C-C motif) ligand 12                  | 5.46          | 21.04         | 0.03587     |
| <i>Clec4n</i> | C-type lectin domain family 4, member n          | 13.05         | 14.19         | 0.02143     |
| <i>Pilra</i>  | paired immunoglobulin-like type 2 receptor alpha | 7.92          | 12.89         | 0.00887     |

|               |                                                   |       |      |         |
|---------------|---------------------------------------------------|-------|------|---------|
| <i>Ccl6</i>   | chemokine (C-C motif) ligand 6                    | 50.15 | 8.39 | 0.00036 |
| <i>Gpr84</i>  | G protein-coupled receptor 84                     | 13.52 | 7.39 | 0.02461 |
| <i>Pilrb1</i> | paired immunoglobulin-like type 2 receptor beta 1 | 5.99  | 5.76 | 0.00305 |
| <i>Wfdc17</i> | WAP four-disulfide core domain 17                 | 29.07 | 5.65 | 0.02023 |
| <i>Srgn</i>   | serglycin                                         | 20.98 | 5.10 | 0.00121 |

<sup>a</sup>  $\Delta$ GE: average differential gene expression in unstimulated BMDM over cancer cells.

<sup>b</sup>  $\Delta$ GE: average differential gene expression in cancer cell CM-incubated over unstimulated BMDM.

<sup>c</sup> ANOVA  $p$ : probability, one-way ANOVA.

**Table S2. Differential gene expression of *Kras*-mutant cancer cells.** Transcripts over-represented in MC38, LLC, and AE17 cells > 10-fold compared with PANO2 and B16F10 cells, as assessed by microarray (mouse Gene ST2.0, Affymetrix, Sta.Clara, CA). Only *Nid1* and *Vcan* (shaded grey) were also identified by the proteomic screen of tumour cell supernatants. Microarrays compared were GSM3744958 and GSM3752395 (*Kras*-wild-type cancer cells) versus GSM3744954, GSM3744950, and GSM3744952 (*Kras*-mutant cancer cells).

| Gene symbol     | Gene name                                           | $\Delta$ GE <sup>a</sup> | ANOVA <i>p</i> <sup>b</sup> |
|-----------------|-----------------------------------------------------|--------------------------|-----------------------------|
| <i>Ccl2</i>     | chemokine (C-C motif) ligand 2                      | 51.05                    | 0.003345                    |
| <i>Prrx1</i>    | paired related homeobox 1                           | 49.20                    | 0.000070                    |
| <i>Pxdn</i>     | peroxidase homolog (Drosophila)                     | 48.21                    | 0.000247                    |
| <i>Gpr149</i>   | G protein-coupled receptor 149                      | 45.96                    | 0.004762                    |
| <i>Hist1h1b</i> | histone cluster 1, H1b                              | 39.05                    | 0.029208                    |
| <i>Ogn</i>      | osteoglycin                                         | 38.41                    | 0.009883                    |
| <i>Hspb8</i>    | heat shock protein 8                                | 27.71                    | 0.002543                    |
| <i>Ptprn</i>    | protein tyrosine phosphatase, receptor type, N      | 26.87                    | 0.007407                    |
| <i>Dkk2</i>     | dickkopf homolog 2 ( <i>Xenopus laevis</i> )        | 25.44                    | 0.007188                    |
| <i>Apbb1ip</i>  | amyloid beta (A4) precursor protein-binding, family | 24.82                    | 0.007777                    |
| <i>Epb41l3</i>  | erythrocyte membrane protein band 4.1 like 3        | 21.67                    | 0.009291                    |
| <i>Fbn1</i>     | fibrillin 1                                         | 19.89                    | 0.022138                    |
| <i>Ccl7</i>     | chemokine (C-C motif) ligand 7                      | 19.20                    | 0.003594                    |
| <i>Col3a1</i>   | collagen, type III, alpha 1                         | 18.25                    | 0.046921                    |
| <i>Flrt2</i>    | fibronectin leucine rich transmembrane protein 2    | 17.40                    | 0.004230                    |
| <i>Dhrs9</i>    | dehydrogenase/reductase (SDR family) member 9       | 16.82                    | 0.011891                    |
| <i>Nid1</i>     | nidogen 1                                           | 16.77                    | 0.031483                    |
| <i>Vcan</i>     | versican                                            | 14.94                    | 0.012513                    |
| <i>Dusp9</i>    | dual specificity phosphatase 9                      | 13.97                    | 0.000431                    |
| <i>Syne1</i>    | spectrin repeat containing, nuclear envelope 1      | 12.97                    | 0.009084                    |
| <i>Chst11</i>   | carbohydrate sulfotransferase 11                    | 12.35                    | 0.013923                    |
| <i>Fkbp10</i>   | FK506 binding protein 10                            | 12.21                    | 0.013300                    |
| <i>Vcam1</i>    | vascular cell adhesion molecule 1                   | 12.13                    | 0.047450                    |
| <i>Pdgfra</i>   | platelet derived growth factor receptor, alpha      | 10.88                    | 0.032029                    |
| <i>Clecl1a</i>  | C-type lectin domain family 1, member a             | 10.09                    | 0.005469                    |

<sup>a</sup>  $\Delta$ GE: average differential gene expression in MC38, LLC, and AE17 cells over PANO2 and B16F10 cells.

<sup>b</sup> ANOVA *p*: probability, one-way ANOVA.

**Table S3. Differential gene expression of BMDMs lacking NF- $\kappa$ B signalling.** Transcripts under-represented > 5-fold in bone marrow-derived macrophages (BMDM) from *Lyz2.Cre;Chukf/f* and *Lyz2.Cre;Ikkbbf/f* mice compared with *Lyz2.Cre* controls, as assessed by microarray (mouse Gene ST2.0, Affymetrix, Sta.Clara, CA). Note the significant down-regulation of *Lyz2* and *Il1b*. Microarrays compared were GSM2486425 (pooled BMDM from *Chukf/f*, *Ikkbbf/f*, and *Lyz2.Cre* mice) versus GSM3752396 (BMDM from *Chukf/f;Lyz2.Cre* mice) versus GSM3752397 (BMDM from *Ikkbbf/f;Lyz2.Cre* mice).

| Gene symbol     | Gene name                                                                       | $\Delta$ GE <sup>a</sup> | $\Delta$ GE <sup>b</sup> | $\Delta$ GE <sup>c</sup> |
|-----------------|---------------------------------------------------------------------------------|--------------------------|--------------------------|--------------------------|
| <i>Lyz2</i>     | lysozyme 2                                                                      | -50.60                   | -67.00                   | -58.80                   |
| <i>Uty</i>      | ubiquitously transcribed tetratricopeptide repeat gene, Y chromosome            | -24.36                   | -25.20                   | -24.78                   |
| <i>Hpgd</i>     | hydroxyprostaglandin dehydrogenase 15 (NAD)                                     | -27.81                   | -9.50                    | -18.66                   |
| <i>Kdm5d</i>    | lysine (K)-specific demethylase 5D                                              | -12.95                   | -17.20                   | -15.08                   |
| <i>Il1b</i>     | interleukin 1 beta                                                              | -8.78                    | -11.79                   | -10.29                   |
| <i>Ifi1bl1</i>  | interferon induced protein with tetratricopeptide repeats 1B like 1             | -14.28                   | -6.15                    | -10.22                   |
| <i>Ddx3y</i>    | DEAD (Asp-Glu-Ala-Asp) box polypeptide 3, Y-linked                              | -11.14                   | -8.56                    | -9.85                    |
| <i>C3</i>       | complement component 3                                                          | -10.08                   | -7.30                    | -8.69                    |
| <i>Eif2s3y</i>  | eukaryotic translation initiation factor 2, subunit 3, structural gene Y-linked | -6.04                    | -7.91                    | -6.98                    |
| <i>Ifi44</i>    | interferon-induced protein 44                                                   | -5.93                    | -7.88                    | -6.91                    |
| <i>Tmem176a</i> | transmembrane protein 176A                                                      | -6.78                    | -5.75                    | -6.27                    |

<sup>a</sup>  $\Delta$ GE: average differential gene expression in BMDM from *Lyz2.Cre;Chukf/f* mice over *Lyz2.Cre* controls.

<sup>b</sup>  $\Delta$ GE: average differential gene expression in BMDM from *Lyz2.Cre;Ikkbbf/f* mice over *Lyz2.Cre* controls.

<sup>c</sup>  $\Delta$ GE: average differential gene expression in BMDM from *Lyz2.Cre;Chukf/f* and *Lyz2.Cre;Ikkbbf/f* mice compared with *Lyz2.Cre* controls.



**Table S4. PCR primers used in this study.**

| Assay <sup>a</sup> | Primer                   | Sequence                    | Product (bp) |
|--------------------|--------------------------|-----------------------------|--------------|
| PCR                | <i>Kras</i> exon 1F      | TCTTAGAGTTTTACACACAAAGGTGAG | 289          |
| PCR                | <i>Kras</i> exon 1R      | TTCAAAGCGGCTGGCTGC          |              |
| PCR                | <i>Kras</i> exon 2F      | TTGAGCTGTTTACATCACCTTG      | 315          |
| PCR                | <i>Kras</i> exon 2R      | GCAAAGAATCAATAAATGTAAGCTATC |              |
| PCR                | <i>Kras</i> exon 3F      | GTTGAGGGCAAGGTTTGAAG        | 287          |
| PCR                | <i>Kras</i> exon 3R      | ACGAACACCATCTGGAGCAC        |              |
| PCR                | <i>Mycoplasma Spp.</i> F | GGGAGCAAACAGGATTAGATACCCT   | 270          |
| PCR                | <i>Mycoplasma Spp.</i> R | TGCACCATCTGTCACTCTGTTAACCTC |              |
| qPCR               | <i>mVcan</i> F           | CCAGAACGGAAATATCAAGATTGG    | 201          |
| qPCR               | <i>mVcan</i> R           | TGAAACACAACACCATCCAC        |              |
| qPCR               | <i>mIlf</i> F            | TTTGACAGTGATGAGAATGACC      | 162          |
| qPCR               | <i>mIlf</i> R            | AATGAGTGATACTGCCTGCC        |              |
| qPCR               | <i>mTnf</i> F            | GTCCCCAAAGGGATGAGAAGT       | 124          |
| qPCR               | <i>mTnf</i> R            | TTTGCTACGACGTGGGCTAC        |              |
| qPCR               | <i>mGusb</i> F           | TTACTTTAAGACGCTGATCACC      | 165          |
| qPCR               | <i>mGusb</i> R           | ACCTCCAAATGCCCATAGTC        |              |
| qPCR               | <i>hACTB</i> F           | GAGCACAGAGCCTCGCCTTT        | 70           |
| qPCR               | <i>hACTB</i> R           | TCATCATCCATGGTGAGCTGG       |              |
| qPCR               | <i>hVCAN</i> F           | GAATGTCACTCTAATCCCTGTC      | 117          |
| qPCR               | <i>hVCAN</i> R           | TGTCTCGGTATCTTGCTCAC        |              |

<sup>a</sup>Assay: PCR, DNA polymerase chain reaction; qPCR, quantitative (real-time) PCR.  
 Provider: VBC Biotech, Vienna, Austria.

**Table S5. Lentiviral shRNA pools used in this study.**

| Target       | Abbreviation    | Catalog #   | Target Sequences                                                                           |
|--------------|-----------------|-------------|--------------------------------------------------------------------------------------------|
| random       | shC             | sc-108080-V | target sequence proprietary                                                                |
| <i>Vcan</i>  | sh <i>Vcan</i>  | sc-41904-V  | 5'-CAACCACCATCGAAATGAA-3'<br>5'-CTCACAGGCTGTAATTACA-3'<br>5'-GTAGACATATCCCATACTA-3'        |
| <i>Kras</i>  | sh <i>Kras</i>  | sc-43876-V  | 5'-CTACAGGAAACAAGTAGTA-3'<br>5'-GAACAGTAGACACGAAACA-3'<br>5'-CCATTCAGTTTCCATGTTA-3'        |
| <i>Chuk</i>  | sh <i>Chuk</i>  | sc-29366-V  | 5'-CCATGGTGTTTGAATGTATTT-3'<br>5'-CTCTCAGTGTGTTCTAGATTT-3'<br>5'-GCAAGCAGAAGATTATTGATT-3'  |
| <i>Ikbkb</i> | sh <i>Ikbkb</i> | sc-35645-V  | 5'-GATGACATCTTGAACCTTGATT-3'<br>5'-CTGCACATTTGAATCTGTATT-3'<br>5'-CAGCTCTCTTAGACAGTTATT-3' |
| <i>Ikbke</i> | sh <i>Ikbke</i> | sc-39057-V  | 5'-GAGATCATGTACAGAATCATT-3'<br>5'-CAGTGTTGTTTGGACAAGATT-3'<br>5'-CCAACAACTAGCATTACTTT-3'   |
| <i>Tbk1</i>  | sh <i>Tbk1</i>  | sc-39059-V  | 5'-GTAGGACTGAGATATGAAATT-3'<br>5'-GCATCACAGAGATTTACTATT-3'<br>5'-GAAGTTCTAGTTTGCACAATT-3'  |

Provider: Santa Cruz Biotechnology, Dallas, TX.

**Data S1.**

\*.xlsx file of proteomic analysis of secreted proteins of *Kras*-mutant and -wild-type cancer cells.
