# Supplementary material for: Non-Oncogene Addiction of KRAS-Mutant Cancers to IL-1β via Versican and Mononuclear IKKβ
Source: Cancers (Basel). 2023 Mar 20;15(6):1866. doi: 10.3390/cancers15061866 (PMC10047096; doi:10.3390/cancers15061866)
Supplement: Supplementary file 1 [file cancers-15-01866-s001.zip › Spella et al_Cancers_Data_S1.xlsx]

## Sheet: Figure 4C
Proteomic results shown in Figure4C
Protein FDR Confidence: Combined	Accession	# Unique Peptides	Description	Abundances (Normalized): KRAS_WT_B16_F10	Abundances (Normalized): KRAS_WT_Pano2	Abundances (Normalized): KRAS_MUT_LLC	Abundances (Normalized): KRAS_MUT_AE17	Abundances (Normalized): KRAS_MUT_MC38	Gene symbol	MW [kDa]	Abundances (Normalized) MUT/WT	# Protein Groups	Modifications	Exp. q-value: Combined	Sum PEP Score	Coverage [%]	# Peptides	# PSMs	# Unique Peptides	# AAs	calc. pI	Score Sequest HT: Sequest HT	# Peptides (by Search Engine): Sequest HT	Biological Process	Cellular Component	Molecular Function	Pfam IDs	Entrez Gene ID	Ensembl Gene ID	Gene Symbol	Chromosome	KEGG Pathways	WikiPathways	Reactome Pathways	# Protein Pathway Groups
High	P28653	11	Biglycan OS=Mus musculus GN=Bgn PE=1 SV=1	1.38682e+06	1.72718e+06	3.72894e+06	1.15684e+06	1.28528e+09	Bgn	41.6	276.207	1		0	265.807	49	12	79	11	369	7.27	259.58	12	metabolic process;regulation of biological process;response to stimulus	cell surface;cytoplasm;extracellular;membrane	enzyme regulator activity;protein binding	Pf01462, Pf12799, Pf13855, Pf14580	12111	ENSMUSG00000031375.17	Bgn	X			A tetrasaccharide linker sequence is required for GAG synthesis; ECM proteoglycans; CS/DS degradation; Dermatan sulfate biosynthesis; Chondroitin sulfate biosynthesis	11
High	Q03350	47	Thrombospondin-2 OS=Mus musculus GN=Thbs2 PE=1 SV=2	9.24293e+06	1.50894e+07	4.8426e+09	1.53303e+08	1.00294e+08	Thbs2	129.8	139.628	1		0	760.228	56	49	256	47	1172	4.82	705.91	49	regulation of biological process	extracellular	metal ion binding;protein binding	Pf00090, Pf00093, Pf02412, Pf05735, Pf12947	21826	ENSMUSG00000023885.8	Thbs2	17	Focal adhesion; Phagosome; ECM-receptor interaction; PI3K-Akt signaling pathway; Malaria	Focal Adhesion-PI3K-Akt-mTOR-signaling pathway; Focal Adhesion	Signaling by PDGF	10
High	Q62059	22	Versican core protein OS=Mus musculus GN=Vcan PE=1 SV=2	5.17183e+06	2.37448e+06	5.66165e+08	8.08153e+07	2.21094e+08	Vcan	366.6	76.6886	1		0	301.273	10	22	82	22	3357	4.64	270.31	22	cell differentiation;cellular component movement;regulation of biological process	cell surface;extracellular;membrane	metal ion binding;protein binding;structural molecule activity	Pf00008, Pf00059, Pf00084, Pf00193, Pf07645, Pf07974, Pf12947, Pf14670	13003		Vcan	13				0
High	Q64213	8	Splicing factor 1 OS=Mus musculus GN=Sf1 PE=1 SV=6	821134	422793	5.83621e+07	9.58885e+06	4.94701e+07	Sf1	70.4	62.9303	1	Met-loss+Acetyl [N-Term]	0	68.667	19	8	24	8	653	8.98	71.84	8	cell differentiation;cell organization and biogenesis;metabolic process;regulation of biological process	cytoplasm;nucleus;spliceosomal complex	metal ion binding;protein binding;RNA binding	Pf00013, Pf00098, Pf13014	22668		Sf1	19		PluriNetWork	mRNA Splicing - Major Pathway	5
High	P30681	8	High mobility group protein B2 OS=Mus musculus GN=Hmgb2 PE=1 SV=3	3.02123e+06	4.42489e+06	3.36371e+08	6.72556e+07	1.97415e+08	Hmgb2	24.1	53.8125	1		0	117.042	39	10	73	8	210	7.31	192.23	10	cell organization and biogenesis;cellular component movement;defense response;metabolic process;regulation of biological process;response to stimulus	chromosome;cytoplasm;extracellular;nucleus	DNA binding;protein binding;RNA binding	Pf00505, Pf09011	97165	ENSMUSG00000054717.7	Hmgb2	8			Activation of DNA fragmentation factor	5
High	P28654	11	Decorin OS=Mus musculus GN=Dcn PE=1 SV=1	6.78071e+06	2.2449e+06	3.0728e+08	1.46064e+07	3.66445e+08	Dcn	39.8	50.8428	1		0	168.993	40	12	111	11	354	8.68	337.63	12	metabolic process;regulation of biological process;response to stimulus	cytoplasm;extracellular	enzyme regulator activity;protein binding;RNA binding	Pf01462, Pf12799, Pf13306, Pf13855	13179	ENSMUSG00000019929.16	Dcn	10	Proteoglycans in cancer; TGF-beta signaling pathway		A tetrasaccharide linker sequence is required for GAG synthesis; ECM proteoglycans; CS/DS degradation; Degradation of the extracellular matrix; Dermatan sulfate biosynthesis; Chondroitin sulfate biosynthesis	14
High	P08030	8	Adenine phosphoribosyltransferase OS=Mus musculus GN=Aprt PE=1 SV=2	1.94989e+06	1.23531e+06	1.39018e+08	3.0873e+07	6.58673e+07	Aprt	19.7	49.3445	1		0	98.554	67	8	29	8	180	6.79	90.29	8	metabolic process;response to stimulus;transport	cytoplasm;cytosol	catalytic activity;nucleotide binding	Pf00156	11821	ENSMUSG00000006589.8	Aprt	8	Metabolic pathways; Purine metabolism	Purine metabolism	Neutrophil degranulation; Purine salvage	10
High	P58022	22	Lysyl oxidase homolog 2 OS=Mus musculus GN=Loxl2 PE=1 SV=2	1.7855e+06	2.51612e+06	6.18546e+06	2.93653e+08	3.28911e+06	Loxl2	86.9	46.9787	1		0	180.907	40	22	45	22	776	6.57	120.76	22	cell organization and biogenesis;cell proliferation;cellular component movement;metabolic process;regulation of biological process;response to stimulus;transport	chromosome;extracellular;membrane;nucleus	catalytic activity;metal ion binding;protein binding;receptor activity	Pf00530, Pf01186	94352	ENSMUSG00000034205.16	Loxl2	14				0
High	O08539	10	Myc box-dependent-interacting protein 1 OS=Mus musculus GN=Bin1 PE=1 SV=1	276735	924881	4.8927e+07	4.34821e+06	2.6311e+07	Bin1	64.4	44.1551	1		0	79.564	27	10	15	10	588	5.03	44.78	10	cell differentiation;cell organization and biogenesis;development;regulation of biological process;transport	cytoplasm;cytosol;membrane;nucleus	protein binding	Pf00018, Pf03114, Pf07653, Pf14604	30948	ENSMUSG00000024381.15	Bin1	18	Endocytosis; Fc gamma R-mediated phagocytosis		Clathrin-mediated endocytosis	5
High	P83940	5	Transcription elongation factor B polypeptide 1 OS=Mus musculus GN=Tceb1 PE=1 SV=1	781799	828329	58477421	1.03396e+07	3.63812e+07	Tceb1	12.5	43.5569	1		0	51.776	55	5	15	5	112	4.78	36.53	5	metabolic process;regulation of biological process	nucleus	catalytic activity;protein binding	Pf03931	67923; 102642819	ENSMUSG00000079658.9	Tceb1; Eloc; LOC101056616; LOC102642819	1; 2	Ubiquitin mediated proteolysis; HIF-1 signaling pathway; Pathways in cancer; Renal cell carcinoma		RNA Polymerase II Pre-transcription Events; TP53 Regulates Transcription of DNA Repair Genes; Formation of RNA Pol II elongation complex ; Interleukin-7 signaling; Neddylation; Oxygen-dependent proline hydroxylation of Hypoxia-inducible Factor Alpha	24
High	P33434	26	72 kDa type IV collagenase OS=Mus musculus GN=Mmp2 PE=1 SV=1	5.15862e+06	6.10069e+06	1.50321e+07	8.51265e+06	6.80379e+08	Mmp2	74.1	41.6795	1		0	257.441	57	26	66	26	662	5.53	208.07	26	cell differentiation;cell organization and biogenesis;cellular component movement;metabolic process;regulation of biological process;response to stimulus	cytoplasm;extracellular;membrane;mitochondrion;nucleus	catalytic activity;metal ion binding;protein binding	Pf00040, Pf00045, Pf00413, Pf01471	17390	ENSMUSG00000031740.8	Mmp2	8	Leukocyte transendothelial migration; AGE-RAGE signaling pathway in diabetic complications; Proteoglycans in cancer; Pathways in cancer; GnRH signaling pathway; Estrogen signaling pathway; Endocrine resistance; Bladder cancer	Lung fibrosis; IL-3 Signaling Pathway; Matrix Metalloproteinases	Regulation of Insulin-like Growth Factor (IGF) transport and uptake by Insulin-like Growth Factor Binding Proteins (IGFBPs); Collagen degradation; EPH-ephrin mediated repulsion of cells; Activation of Matrix Metalloproteinases	21
High	P08228	5	Superoxide dismutase [Cu-Zn] OS=Mus musculus GN=Sod1 PE=1 SV=2	1.64463e+06	503858	50059793	1.99163e+07	5.88066e+07	Sod1	15.9	39.9607	1		0	48.089	62	5	13	5	154	6.51	32.94	5	cell organization and biogenesis;cellular component movement;cellular homeostasis;metabolic process;regulation of biological process;response to stimulus;transport	cytoplasm;cytosol;extracellular;membrane;mitochondrion;nucleus;vacuole	antioxidant activity;catalytic activity;metal ion binding;protein binding	Pf00080	20655	ENSMUSG00000022982.9	Sod1	16	Amyotrophic lateral sclerosis (ALS); Huntington's disease; Prion diseases; Longevity regulating pathway - multiple species; Peroxisome	One carbon metabolism and related pathways; Oxidative Stress	Platelet degranulation ; Detoxification of Reactive Oxygen Species	14
High	Q60715	15	Prolyl 4-hydroxylase subunit alpha-1 OS=Mus musculus GN=P4ha1 PE=1 SV=2	1.30008e+06	618297	7.48035e+07	1.75947e+07	2.22109e+07	P4ha1	60.9	39.8286	1		0	114.079	40	15	19	15	534	5.9	55.86	15	cell organization and biogenesis;metabolic process	endoplasmic reticulum;membrane;mitochondrion;organelle lumen	catalytic activity;metal ion binding;protein binding	Pf03171, Pf08336	18451	ENSMUSG00000019916.14	P4ha1	10	Arginine and proline metabolism; Metabolic pathways	PluriNetWork	Collagen biosynthesis and modifying enzymes	6
High	O54724	11	Polymerase I and transcript release factor OS=Mus musculus GN=Ptrf PE=1 SV=1	928341	959855	9.09332e+07	3.17909e+06	1.67427e+07	Ptrf	43.9	39.1397	1		0	89.338	39	11	19	11	392	5.52	56.33	11	metabolic process;regulation of biological process	cytoplasm;cytosol;endoplasmic reticulum;membrane;mitochondrion;nucleus	protein binding;RNA binding	Pf15237	19285	ENSMUSG00000004044.9	Ptrf; Cavin1	11			RNA Polymerase I Transcription Termination	3
High	O88393	16	Transforming growth factor beta receptor type 3 OS=Mus musculus GN=Tgfbr3 PE=1 SV=1	2.34889e+06	1.04021e+07	6.62058e+08	1.73055e+07	3.19053e+07	Tgfbr3	93.8	37.1878	1		0	199.22	27	16	51	16	850	6	165.22	16	cell differentiation;cell growth;cell organization and biogenesis;cell proliferation;metabolic process;regulation of biological process;response to stimulus	cell surface;cytoplasm;endoplasmic reticulum;extracellular;membrane	catalytic activity;protein binding;receptor activity;signal transducer activity	Pf00100	21814		Tgfbr3	5		TGF Beta Signaling Pathway		1
High	P62754	6	40S ribosomal protein S6 OS=Mus musculus GN=Rps6 PE=1 SV=1	1.69274e+06	1.96511e+06	7.08767e+07	1.29502e+08	1.68012e+06	Rps6	28.7	36.8264	1		0	40.253	24	6	12	6	249	10.84	30.83	6	cell death;cell differentiation;cell proliferation;metabolic process;regulation of biological process;response to stimulus	cytoplasm;membrane;nucleus;ribosome	protein binding;RNA binding;structural molecule activity	Pf01092	667739; 20104; 105244208	ENSMUSG00000028495.14	Rps6-ps4; Rps6; LOC105244208	2; 4	mTOR signaling pathway; Ribosome; Insulin signaling pathway; Proteoglycans in cancer; HIF-1 signaling pathway; PI3K-Akt signaling pathway; EGFR tyrosine kinase inhibitor resistance	Cytoplasmic Ribosomal Proteins; Focal Adhesion-PI3K-Akt-mTOR-signaling pathway; mRNA processing		10
High	Q64669	14	NAD(P)H dehydrogenase [quinone] 1 OS=Mus musculus GN=Nqo1 PE=1 SV=3	1.765e+06	1.51691e+06	2.99633e+07	9.8099e+06	1.32259e+08	Nqo1	30.9	34.9456	1		0	83.535	54	14	32	14	274	8.72	82.06	14	metabolic process;regulation of biological process;response to stimulus	cytoplasm;cytosol	antioxidant activity;catalytic activity;protein binding;RNA binding	Pf02525, Pf03358	18104	ENSMUSG00000003849.8	Nqo1	8	Ubiquinone and other terpenoid-quinone biosynthesis	Keap1-Nrf2; Estrogen metabolism; Oxidative Stress	Regulation of ornithine decarboxylase (ODC)	8
High	Q8CG16	18	Complement C1r-A subcomponent OS=Mus musculus GN=C1ra PE=1 SV=1	6.74075e+06	573500	1.77394e+08	1.43288e+07	1.88377e+08	C1ra	80	34.6446	1		0	165.311	41	18	45	18	707	5.66	140.91	18	defense response;metabolic process;regulation of biological process;response to stimulus		catalytic activity;metal ion binding	Pf00084, Pf00089, Pf00431, Pf07645, Pf12662, Pf14670	50909	ENSMUSG00000055172.10	C1ra	6	Staphylococcus aureus infection; Phagosome; Complement and coagulation cascades; Pertussis; Systemic lupus erythematosus	Oxidative Damage; Complement Activation, Classical Pathway; Complement and Coagulation Cascades	Regulation of Complement cascade; Classical antibody-mediated complement activation	15
High	Q9QYI3	5	DnaJ homolog subfamily C member 7 OS=Mus musculus GN=Dnajc7 PE=1 SV=2	112997	65057.9	783569	87998.6	8.18804e+06	Dnajc7	56.4	33.9207	1		0	24.788	11	5	6	5	494	6.49	12.77	5	metabolic process	cytoplasm;cytoskeleton;cytosol;membrane;nucleus	protein binding	Pf00226, Pf00515, Pf07719, Pf13414, Pf13424, Pf13431, Pf13432, Pf14559	56354	ENSMUSG00000014195.15	Dnajc7	11				0
High	P62196	13	26S protease regulatory subunit 8 OS=Mus musculus GN=Psmc5 PE=1 SV=1	1.89504e+06	841896	3.70042e+07	3.95484e+07	6.0656e+07	Psmc5	45.6	33.4215	1		0	93.384	38	13	33	13	406	7.55	87.18	13	metabolic process;regulation of biological process;response to stimulus	cytoplasm;membrane;nucleus;proteasome	catalytic activity;nucleotide binding;protein binding;RNA binding	Pf00004, Pf00910, Pf01057, Pf01078, Pf05496, Pf06068, Pf06414, Pf07724, Pf07726, Pf07728, Pf13191, Pf13207, Pf13401	19184	ENSMUSG00000020708.12	Psmc5	11	Proteasome; Epstein-Barr virus infection	Proteasome Degradation	The role of GTSE1 in G2/M progression after G2 checkpoint; CDT1 association with the CDC6:ORC:origin complex; Ubiquitin Mediated Degradation of Phosphorylated Cdc25A; RUNX1 regulates transcription of genes involved in differentiation of HSCs; Degradation of beta-catenin by the destruction complex; Autodegradation of the E3 ubiquitin ligase COP1; UCH proteinases; MAPK6/MAPK4 signaling; SCF-beta-Tr…	128
High	P62320	4	Small nuclear ribonucleoprotein Sm D3 OS=Mus musculus GN=Snrpd3 PE=1 SV=1	2.35439e+06	457231	7.3772e+07	2.7417e+07	3.94685e+07	Snrpd3	13.9	33.3515	1		0	52.255	48	4	30	4	126	10.32	72.78	4	cell organization and biogenesis;metabolic process	cytoplasm;cytosol;nucleus;spliceosomal complex	protein binding;RNA binding	Pf01423	67332	ENSMUSG00000020180.10	Snrpd3	10	Spliceosome; Systemic lupus erythematosus	mRNA processing	mRNA Splicing - Minor Pathway; Cleavage of Growing Transcript in the Termination Region ; mRNA Splicing - Major Pathway; snRNP Assembly; SLBP Dependent Processing of Replication-Dependent Histone Pre-mRNAs; SLBP independent Processing of Histone Pre-mRNAs	17
High	Q9WTM5	18	RuvB-like 2 OS=Mus musculus GN=Ruvbl2 PE=1 SV=3	2.39037e+06	3.02754e+06	9.75486e+07	7.74465e+07	8.64876e+07	Ruvbl2	51.1	32.1751	1	Met-loss+Acetyl [N-Term]	0	116.84	44	18	42	18	463	5.64	106.48	18	cell organization and biogenesis;metabolic process;regulation of biological process;response to stimulus	cytosol;nucleus	catalytic activity;DNA binding;nucleotide binding;protein binding	Pf00004, Pf03796, Pf06068, Pf13481	20174	ENSMUSG00000003868.14	Ruvbl2	7				0
High	P10493	58	Nidogen-1 OS=Mus musculus GN=Nid1 PE=1 SV=2	9.30739e+07	5.70826e+07	4.95462e+09	1.02557e+09	1.2651e+09	Nid1	136.5	32.1677	1		0	1031.84	69	59	452	58	1245	5.44	1433.49	59	cell organization and biogenesis;regulation of biological process	cell surface;extracellular;membrane	metal ion binding;protein binding	Pf00008, Pf00058, Pf00086, Pf06119, Pf06247, Pf07474, Pf07645, Pf12662, Pf12947, Pf14670	18073	ENSMUSG00000005397.7	Nid1	13			Laminin interactions; Degradation of the extracellular matrix	3
High	P62843	5	40S ribosomal protein S15 OS=Mus musculus GN=Rps15 PE=1 SV=2	1.54023e+06	534129	7.85947e+07	1.70018e+07	1.23716e+06	Rps15	17	31.1208	1		0	106.436	64	5	21	5	145	10.39	57.24	5	cell differentiation;cell organization and biogenesis;metabolic process;transport	membrane;ribosome	protein binding;RNA binding;structural molecule activity	Pf00203	20054	ENSMUSG00000063457.14	Rps15	10	Ribosome	Cytoplasmic Ribosomal Proteins		2
High	P47879	12	Insulin-like growth factor-binding protein 4 OS=Mus musculus GN=Igfbp4 PE=1 SV=2	3.06811e+07	1.53081e+06	9.67014e+08	4.98092e+07	4.84979e+08	Igfbp4	27.8	31.0817	1		0	188.378	63	12	67	12	254	7.17	236.71	12	cell proliferation;defense response;regulation of biological process;response to stimulus	extracellular	protein binding	Pf00086, Pf00219	16010	ENSMUSG00000017493.12	Igfbp4	11		Factors and pathways affecting insulin-like growth factor (IGF1)-Akt signaling; Myometrial Relaxation and Contraction Pathways	Regulation of Insulin-like Growth Factor (IGF) transport and uptake by Insulin-like Growth Factor Binding Proteins (IGFBPs); Post-translational protein phosphorylation	6
High	Q61656	12	Probable ATP-dependent RNA helicase DDX5 OS=Mus musculus GN=Ddx5 PE=1 SV=2	844176	1.28104e+06	4.8674e+07	2.53497e+07	2.44998e+07	Ddx5	69.2	30.9061	1		0	67.329	28	17	35	12	614	8.92	77.1	17	cell differentiation;cell organization and biogenesis;metabolic process;regulation of biological process;response to stimulus	cytoplasm;membrane;nucleus;spliceosomal complex	catalytic activity;nucleotide binding;protein binding;RNA binding	Pf00270, Pf00271, Pf08061	13207		Ddx5	11		mRNA processing		1
High	P67984	4	60S ribosomal protein L22 OS=Mus musculus GN=Rpl22 PE=1 SV=2	2.61383e+06	1.43205e+06	94657326	1.73821e+07	7.09001e+07	Rpl22	14.8	30.1442	1		0	40.245	45	4	9	4	128	9.19	36.8	4	cell differentiation;metabolic process	cytoplasm;nucleus;ribosome	RNA binding;structural molecule activity	Pf01776	19934; 100047372; 102642602	ENSMUSG00000028936.15	Rpl22; LOC100047372; LOC100504863; LOC102642602	4; 7	Ribosome	Cytoplasmic Ribosomal Proteins; mRNA processing	L13a-mediated translational silencing of Ceruloplasmin expression; Nonsense Mediated Decay (NMD) independent of the Exon Junction Complex (EJC); Nonsense Mediated Decay (NMD) enhanced by the Exon Junction Complex (EJC); GTP hydrolysis and joining of the 60S ribosomal subunit; Formation of a pool of free 40S subunits; Major pathway of rRNA processing in the nucleolus and cytosol; SRP-dependent cot…	18
High	Q08943	12	FACT complex subunit SSRP1 OS=Mus musculus GN=Ssrp1 PE=1 SV=2	799858	1.26455e+06	4.65818e+07	2.17722e+07	2.46868e+07	Ssrp1	80.8	30.0461	1		0	82.504	24	12	23	12	708	6.76	54.48	12	metabolic process;regulation of biological process;response to stimulus	chromosome;nucleus	DNA binding;RNA binding	Pf00505, Pf03531, Pf08512, Pf09011	20833	ENSMUSG00000027067.16	Ssrp1	2		PluriNetWork	Regulation of TP53 Activity through Phosphorylation; RNA Polymerase II Pre-transcription Events; TP53 Regulates Transcription of DNA Repair Genes; Formation of RNA Pol II elongation complex	11
High	P61358	6	60S ribosomal protein L27 OS=Mus musculus GN=Rpl27 PE=1 SV=2	4.59948e+06	1.16387e+06	1.65153e+08	6.9254e+07	1.22824e+07	Rpl27	15.8	28.5354	1		0	34.865	45	6	15	6	136	10.56	24.45	6	metabolic process	membrane;nucleus;ribosome	RNA binding;structural molecule activity	Pf00467, Pf01777	19942; 108167922	ENSMUSG00000063316.13; ENSMUSG00000073640.2	Rpl27; LOC108167922	11; 18	Ribosome	Cytoplasmic Ribosomal Proteins		2
High	Q8VHX6	61	Filamin-C OS=Mus musculus GN=Flnc PE=1 SV=3	1.31082e+07	1.70375e+07	4.42131e+08	3.75761e+08	4.54723e+08	Flnc	290.9	28.1437	1		0	636.736	39	74	233	61	2726	5.95	621.39	74		cytoplasm;cytoskeleton;cytosol;membrane	protein binding	Pf00307, Pf00630	68794	ENSMUSG00000068699.12	Flnc	6	MAPK signaling pathway; Focal adhesion; Proteoglycans in cancer; Salmonella infection		Cell-extracellular matrix interactions	7
High	Q62376	10	U1 small nuclear ribonucleoprotein 70 kDa OS=Mus musculus GN=Snrnp70 PE=1 SV=2	1.79179e+06	1.88662e+06	81661054	5.61219e+07	1.20658e+07	Snrnp70	52	27.1583	1	Met-loss+Acetyl [N-Term]	0	61.189	27	10	21	10	448	9.94	44.98	10	metabolic process;regulation of biological process;response to stimulus	cytoplasm;nucleus;spliceosomal complex	RNA binding	Pf00076, Pf12220, Pf13893, Pf14259	20637	ENSMUSG00000063511.11	Snrnp70	7	Spliceosome	mRNA processing	mRNA Splicing - Major Pathway	6
High	P84099	4	60S ribosomal protein L19 OS=Mus musculus GN=Rpl19 PE=1 SV=1	1.0088e+06	1.11914e+06	4.71054e+07	3.47203e+07	2.09065e+06	Rpl19	23.5	26.2903	1		0	30.357	22	4	9	4	196	11.47	16.29	4	metabolic process	membrane;ribosome	RNA binding;structural molecule activity	Pf01280	19921; 100041511	ENSMUSG00000017404.12	Rpl19; Rpl19-ps11	11; 8	Ribosome	Cytoplasmic Ribosomal Proteins; mRNA processing	L13a-mediated translational silencing of Ceruloplasmin expression; Nonsense Mediated Decay (NMD) independent of the Exon Junction Complex (EJC); Nonsense Mediated Decay (NMD) enhanced by the Exon Junction Complex (EJC); GTP hydrolysis and joining of the 60S ribosomal subunit; Formation of a pool of free 40S subunits; Major pathway of rRNA processing in the nucleolus and cytosol; SRP-dependent cot…	18
High	P60867	4	40S ribosomal protein S20 OS=Mus musculus GN=Rps20 PE=1 SV=1	4.69674e+06	864276	129208690	4.32847e+07	4.48828e+07	Rps20	13.4	26.0595	1		0	23.96	26	4	16	4	119	9.94	41.81	4	metabolic process	cytoplasm;membrane;ribosome	RNA binding;structural molecule activity	Pf00338	67427	ENSMUSG00000028234.6	Rps20	4	Ribosome	Cytoplasmic Ribosomal Proteins; mRNA processing	L13a-mediated translational silencing of Ceruloplasmin expression; Nonsense Mediated Decay (NMD) independent of the Exon Junction Complex (EJC); Nonsense Mediated Decay (NMD) enhanced by the Exon Junction Complex (EJC); Ribosomal scanning and start codon recognition; GTP hydrolysis and joining of the 60S ribosomal subunit; Formation of a pool of free 40S subunits; SRP-dependent cotranslational pr…	19
High	P59325	13	Eukaryotic translation initiation factor 5 OS=Mus musculus GN=Eif5 PE=1 SV=1	1.25071e+06	1.45883e+06	4.56826e+07	2.16474e+07	3.61409e+07	Eif5	48.9	25.4584	1		0	68.841	30	13	27	13	429	5.52	66.62	13	cell organization and biogenesis;metabolic process;regulation of biological process	cytoplasm;cytosol;membrane	nucleotide binding;protein binding;RNA binding	Pf01873, Pf02020	217869; 102641436	ENSMUSG00000021282.16	Eif5; LOC100047658; LOC102641436	12; 10	RNA transport	Translation Factors	Ribosomal scanning and start codon recognition; GTP hydrolysis and joining of the 60S ribosomal subunit	8
High	Q60973	11	Histone-binding protein RBBP7 OS=Mus musculus GN=Rbbp7 PE=1 SV=1	3.05698e+06	1.19903e+06	8.52247e+07	2.29568e+07	5.42871e+07	Rbbp7	47.8	25.4493	1		0	171.873	66	17	63	11	425	5.05	174	17	cell organization and biogenesis;metabolic process;regulation of biological process;response to stimulus	cytosol;nucleus	protein binding;RNA binding	Pf00400, Pf12265	245688	ENSMUSG00000031353.13	Rbbp7	X		PluriNetWork; EGFR1 Signaling Pathway	HATs acetylate histones; Oxidative Stress Induced Senescence; Deposition of new CENPA-containing nucleosomes at the centromere; RNA Polymerase I Transcription Initiation; PRC2 methylates histones and DNA; NoRC negatively regulates rRNA expression; Regulation of PTEN gene transcription; Regulation of TP53 Activity through Acetylation; Neddylation; RMTs methylate histone arginines; PKMTs methylate …	37
High	Q9Z204	13	Heterogeneous nuclear ribonucleoproteins C1/C2 OS=Mus musculus GN=Hnrnpc PE=1 SV=1	9.09914e+06	6.99584e+06	338228278	9.48143e+07	1.78917e+08	Hnrnpc	34.4	25.3479	1		0	95.075	50	13	40	13	313	5.05	89.48	13	cell differentiation;cell organization and biogenesis;metabolic process;regulation of biological process	cytoskeleton;cytosol;extracellular;membrane;nucleus;spliceosomal complex	DNA binding;enzyme regulator activity;protein binding;RNA binding	Pf00076, Pf13893, Pf14259	15381	ENSMUSG00000060373.14	Hnrnpc	14	Spliceosome	mRNA processing	mRNA Splicing - Major Pathway; SUMOylation of RNA binding proteins	11
High	P62315	4	Small nuclear ribonucleoprotein Sm D1 OS=Mus musculus GN=Snrpd1 PE=1 SV=1	3.4923e+06	1.41105e+06	106482905	3.56523e+07	4.42017e+07	Snrpd1	13.3	25.3346	1		0	45.859	55	4	20	4	119	11.56	66.23	4	cell organization and biogenesis;metabolic process	cytoplasm;cytosol;nucleus;spliceosomal complex	RNA binding	Pf01423	20641	ENSMUSG00000002477.4	Snrpd1	18	Spliceosome; Systemic lupus erythematosus	mRNA processing	mRNA Splicing - Major Pathway; mRNA Splicing - Minor Pathway; snRNP Assembly	10
High	Q62446	9	Peptidyl-prolyl cis-trans isomerase FKBP3 OS=Mus musculus GN=Fkbp3 PE=1 SV=2	7.52655e+06	1.06937e+06	2.05808e+08	3.13241e+07	8.76693e+07	Fkbp3	25.1	25.1903	1	Met-loss+Acetyl [N-Term]	0	109.306	48	9	35	9	224	9.28	106.07	9	metabolic process	cytoplasm;nucleus	catalytic activity;protein binding;RNA binding	Pf00254	30795	ENSMUSG00000020949.8	Fkbp3	12				0
High	P63073	7	Eukaryotic translation initiation factor 4E OS=Mus musculus GN=Eif4e PE=1 SV=1	2.88564e+06	2.02348e+06	9.62633e+07	3.71377e+07	5.06776e+07	Eif4e	25	24.9982	1		0	58.141	42	7	34	7	217	6.15	52.63	7	defense response;metabolic process;regulation of biological process;response to stimulus	cytoplasm;cytosol	protein binding;RNA binding	Pf01652	13684	ENSMUSG00000028156.12	Eif4e	3	mTOR signaling pathway; Insulin signaling pathway; Longevity regulating pathway; HIF-1 signaling pathway; PI3K-Akt signaling pathway; EGFR tyrosine kinase inhibitor resistance; RNA transport	Hypertrophy Model; Focal Adhesion-PI3K-Akt-mTOR-signaling pathway; Translation Factors; mRNA processing; IL-6 signaling Pathway; IL-2 Signaling Pathway; Alpha6-Beta4 Integrin Signaling Pathway; Insulin Signaling	L13a-mediated translational silencing of Ceruloplasmin expression; mTORC1-mediated signalling; Ribosomal scanning and start codon recognition; GTP hydrolysis and joining of the 60S ribosomal subunit; ISG15 antiviral mechanism; Translation initiation complex formation; Deadenylation of mRNA	35
High	P46664	15	Adenylosuccinate synthetase isozyme 2 OS=Mus musculus GN=Adss PE=1 SV=2	5.32928e+06	2.78227e+06	143188941	5.53523e+07	9.86776e+07	Adss	50	24.4276	1	Met-loss+Acetyl [N-Term]	0	135.82	48	16	43	15	456	6.38	124.85	16	metabolic process;response to stimulus	cytoplasm;cytosol;membrane	catalytic activity;metal ion binding;nucleotide binding	Pf00709	11566	ENSMUSG00000015961.8	Adss	1	Metabolic pathways; Purine metabolism; Alanine, aspartate and glutamate metabolism	Purine metabolism; Nucleotide Metabolism	Purine ribonucleoside monophosphate biosynthesis	9
High	P62264	7	40S ribosomal protein S14 OS=Mus musculus GN=Rps14 PE=1 SV=3	4.15066e+06	1.45245e+06	1.3765e+08	3.92656e+07	2.65179e+07	Rps14	16.3	24.2049	1		0	81.948	64	7	21	7	151	10.05	70.48	7	cell differentiation;cell organization and biogenesis;metabolic process;regulation of biological process	membrane;mitochondrion;ribosome	RNA binding;structural molecule activity;translation regulator activity	Pf00411	20044	ENSMUSG00000024608.10	Rps14	18	Ribosome	Cytoplasmic Ribosomal Proteins; mRNA processing	L13a-mediated translational silencing of Ceruloplasmin expression; Nonsense Mediated Decay (NMD) independent of the Exon Junction Complex (EJC); Nonsense Mediated Decay (NMD) enhanced by the Exon Junction Complex (EJC); Ribosomal scanning and start codon recognition; GTP hydrolysis and joining of the 60S ribosomal subunit; Formation of a pool of free 40S subunits; Major pathway of rRNA processing…	22
High	Q6ZWM4	6	U6 snRNA-associated Sm-like protein LSm8 OS=Mus musculus GN=Lsm8 PE=1 SV=3	1.53618e+06	502470	49729153	4.19465e+06	2.00933e+07	Lsm8	10.4	24.2047	1	Met-loss+Acetyl [N-Term]	0	57.733	91	6	11	6	96	4.48	31.6	6	metabolic process	nucleus;spliceosomal complex	RNA binding	Pf01423	76522	ENSMUSG00000044155.11	Naa38; Lsm8	6	RNA degradation; Spliceosome	mRNA processing	mRNA Splicing - Major Pathway	7
High	P28352	13	DNA-(apurinic or apyrimidinic site) lyase OS=Mus musculus GN=Apex1 PE=1 SV=2	5.42838e+06	4.94945e+06	1.78704e+08	1.14712e+08	8.13634e+07	Apex1	35.5	24.0756	1		0	160.85	53	13	44	13	317	7.91	152.47	13	cell organization and biogenesis;cellular homeostasis;metabolic process;regulation of biological process;response to stimulus	cytoplasm;endoplasmic reticulum;mitochondrion;nucleus	catalytic activity;DNA binding;metal ion binding;protein binding;RNA binding	Pf03372, Pf14529	11792	ENSMUSG00000035960.13	Apex1	14	Base excision repair		PCNA-Dependent Long Patch Base Excision Repair; Abasic sugar-phosphate removal via the single-nucleotide replacement pathway; Displacement of DNA glycosylase by APEX1; POLB-Dependent Long Patch Base Excision Repair	10
High	P99027	6	60S acidic ribosomal protein P2 OS=Mus musculus GN=Rplp2 PE=1 SV=3	8.3242e+06	2.2778e+06	173013946	1.18399e+08	8.84012e+07	Rplp2	11.6	23.8832	1		0	84.594	91	6	31	6	115	4.54	106.23	6	metabolic process	membrane;ribosome	structural molecule activity	Pf00428	67186	ENSMUSG00000025508.13	Rplp2	7	Ribosome	Cytoplasmic Ribosomal Proteins	L13a-mediated translational silencing of Ceruloplasmin expression; Nonsense Mediated Decay (NMD) independent of the Exon Junction Complex (EJC); Nonsense Mediated Decay (NMD) enhanced by the Exon Junction Complex (EJC); GTP hydrolysis and joining of the 60S ribosomal subunit; Formation of a pool of free 40S subunits; Major pathway of rRNA processing in the nucleolus and cytosol; SRP-dependent cot…	17
High	O35343	6	Importin subunit alpha-3 OS=Mus musculus GN=Kpna4 PE=1 SV=1	889653	801694	2.25415e+07	1.00141e+07	2.79618e+07	Kpna4	57.9	23.8537	1		0	97.731	35	11	29	6	521	4.94	95.69	11	response to stimulus;transport	cytoplasm;cytosol;nucleus	protein binding;transporter activity	Pf00514, Pf01602, Pf01749, Pf13513, Pf13646	16649	ENSMUSG00000027782.10	Kpna4	3				0
High	Q922D4	6	Serine/threonine-protein phosphatase 6 regulatory subunit 3 OS=Mus musculus GN=Ppp6r3 PE=1 SV=1	226570	223419	5.979e+06	4.8233e+06	5.26957e+06	Ppp6r3	94.6	23.8108	1		0	28.9	9	6	11	6	844	4.58	19.56	6	regulation of biological process	cytoplasm;cytosol;membrane;nucleus	protein binding	Pf04499	52036	ENSMUSG00000024908.14	Ppp6r3	19			COPII (Coat Protein 2) Mediated Vesicle Transport	8
High	P14733	18	Lamin-B1 OS=Mus musculus GN=Lmnb1 PE=1 SV=3	3.83484e+06	2.15406e+06	1.17688e+08	4.26331e+07	5.29947e+07	Lmnb1	66.7	23.7457	1		0	109.438	38	20	40	18	588	5.16	92.26	20	metabolic process;regulation of biological process	cytoplasm;membrane;nucleus	catalytic activity;motor activity;protein binding;structural molecule activity	Pf00038, Pf00932, Pf01576, Pf04111, Pf09726, Pf10186, Pf12128	16906	ENSMUSG00000024590.8	Lmnb1	18	Apoptosis	FAS pathway and Stress induction of HSP regulation	Mus musculus biological processes; Formation of Senescence-Associated Heterochromatin Foci (SAHF); Breakdown of the nuclear lamina; Meiotic Synapsis	14
High	P62281	8	40S ribosomal protein S11 OS=Mus musculus GN=Rps11 PE=1 SV=3	1.67381e+07	1.014e+07	7.06768e+08	1.84087e+08	6.63911e+07	Rps11	18.4	23.7429	1	Met-loss+Acetyl [N-Term]	0	52.562	51	8	30	8	158	10.3	41.57	8	cell differentiation;metabolic process	cytoplasm;membrane;ribosome	RNA binding;structural molecule activity	Pf00366	27207	ENSMUSG00000003429.11	Rps11	7	Ribosome	Cytoplasmic Ribosomal Proteins; TNF-alpha NF-kB Signaling Pathway; mRNA processing	L13a-mediated translational silencing of Ceruloplasmin expression; Nonsense Mediated Decay (NMD) independent of the Exon Junction Complex (EJC); Nonsense Mediated Decay (NMD) enhanced by the Exon Junction Complex (EJC); Ribosomal scanning and start codon recognition; GTP hydrolysis and joining of the 60S ribosomal subunit; Formation of a pool of free 40S subunits; SRP-dependent cotranslational pr…	20
High	Q00519	19	Xanthine dehydrogenase/oxidase OS=Mus musculus GN=Xdh PE=1 SV=5	1.18057e+06	2.3653e+06	5.70642e+07	3.52779e+06	6.28769e+07	Xdh	146.5	23.2137	1		0	147.245	21	19	27	19	1335	7.56	76.77	19	metabolic process;regulation of biological process;response to stimulus;transport	cytoplasm;cytosol;endoplasmic reticulum;extracellular	catalytic activity;metal ion binding;nucleotide binding;protein binding	Pf00941, Pf01315, Pf01799, Pf02738, Pf03450, Pf11715	22436	ENSMUSG00000024066.8	Xdh	17	Caffeine metabolism; Metabolic pathways; Purine metabolism; Drug metabolism - other enzymes; Peroxisome	Selenium Micronutrient Network; Folic Acid Network; Purine metabolism	Purine catabolism; Butyrophilin (BTN) family interactions	15
High	P14148	10	60S ribosomal protein L7 OS=Mus musculus GN=Rpl7 PE=1 SV=2	8.96853e+06	4.10228e+06	2.4178e+08	1.68927e+08	3.71615e+07	Rpl7	31.4	22.8432	1		0	78.099	38	10	34	10	270	10.89	88.96	10	metabolic process	cytoplasm;membrane;nucleus;ribosome	DNA binding;protein binding;RNA binding;structural molecule activity	Pf00327, Pf08079	19989	ENSMUSG00000043716.13	Rpl7	1	Ribosome	Cytoplasmic Ribosomal Proteins; mRNA processing		3
High	P47962	14	60S ribosomal protein L5 OS=Mus musculus GN=Rpl5 PE=1 SV=3	1.83199e+07	1.77144e+06	3.91102e+08	2.02373e+08	9.20609e+07	Rpl5	34.4	22.7473	1		0	179.044	53	14	81	14	297	9.77	204.7	14	cell organization and biogenesis;metabolic process;regulation of biological process;response to stimulus	cytoplasm;membrane;nucleus;ribosome	protein binding;RNA binding;structural molecule activity	Pf00861, Pf14204	100503670	ENSMUSG00000058558.12	Rpl5	5	Ribosome		L13a-mediated translational silencing of Ceruloplasmin expression; Nonsense Mediated Decay (NMD) independent of the Exon Junction Complex (EJC); Nonsense Mediated Decay (NMD) enhanced by the Exon Junction Complex (EJC); GTP hydrolysis and joining of the 60S ribosomal subunit; Formation of a pool of free 40S subunits; Major pathway of rRNA processing in the nucleolus and cytosol; SRP-dependent cot…	16
High	Q99L45	13	Eukaryotic translation initiation factor 2 subunit 2 OS=Mus musculus GN=Eif2s2 PE=1 SV=1	3.53911e+06	1.18253e+06	9.79029e+07	3.89488e+07	2.40117e+07	Eif2s2	38.1	22.7129	1		0	93.829	48	13	25	13	331	5.8	59.49	13	cell proliferation;metabolic process	cytoplasm	metal ion binding;protein binding;RNA binding	Pf01873	67204	ENSMUSG00000074656.12	Eif2s2	2	RNA transport	Translation Factors	L13a-mediated translational silencing of Ceruloplasmin expression; Recycling of eIF2:GDP; Ribosomal scanning and start codon recognition; GTP hydrolysis and joining of the 60S ribosomal subunit; ABC-family proteins mediated transport; Formation of the ternary complex, and subsequently, the 43S complex; Translation initiation complex formation	15
High	Q8CDN6	16	Thioredoxin-like protein 1 OS=Mus musculus GN=Txnl1 PE=1 SV=3	6.57903e+06	4.35429e+06	1.56611e+08	7.40083e+07	1.35912e+08	Txnl1	32.2	22.3495	1		0	194.787	66	16	61	16	289	4.96	178.13	16	cellular homeostasis;metabolic process;regulation of biological process;response to stimulus;transport	cytoplasm;cytosol;nucleus;proteasome	antioxidant activity;catalytic activity	Pf00085, Pf06201, Pf13098	53382	ENSMUSG00000024583.2	Txnl1	18				0
High	Q02788	26	Collagen alpha-2(VI) chain OS=Mus musculus GN=Col6a2 PE=1 SV=3	6.97201e+06	1.43088e+07	8.57088e+07	1.67299e+07	5.96186e+08	Col6a2	110.3	21.8859	1		0	337.355	36	26	57	26	1034	6.42	198.21	26	cell organization and biogenesis;response to stimulus	extracellular;membrane		Pf00092, Pf01391, Pf13519	12834	ENSMUSG00000020241.13	Col6a2	10	Focal adhesion; Protein digestion and absorption; ECM-receptor interaction; PI3K-Akt signaling pathway	Focal Adhesion-PI3K-Akt-mTOR-signaling pathway; Focal Adhesion	ECM proteoglycans; Collagen chain trimerization; Integrin cell surface interactions; NCAM1 interactions; Collagen degradation; Signaling by PDGF; Assembly of collagen fibrils and other multimeric structures	22
High	P17225	13	Polypyrimidine tract-binding protein 1 OS=Mus musculus GN=Ptbp1 PE=1 SV=2	4.64931e+06	8.19957e+06	1.85171e+08	3.02545e+07	2.03994e+08	Ptbp1	56.4	21.7617	1		0	198.653	53	15	48	13	527	8.34	177.31	15	metabolic process;regulation of biological process	cytoplasm;membrane;nucleus	catalytic activity;DNA binding;protein binding;RNA binding	Pf00076, Pf13893, Pf14259	19205		Ptbp1	10		mRNA processing		1
High	P47753	8	F-actin-capping protein subunit alpha-1 OS=Mus musculus GN=Capza1 PE=1 SV=4	865286	3.10514e+06	6.69304e+07	1.8727e+07	4.27812e+07	Capza1	32.9	21.5659	1		0	113.549	60	10	32	8	286	5.55	94.51	10	cell organization and biogenesis;regulation of biological process	cytoplasm;cytoskeleton;membrane	protein binding	Pf01267	12340		Capza1	3	Endocytosis			1
High	Q60668	8	Heterogeneous nuclear ribonucleoprotein D0 OS=Mus musculus GN=Hnrnpd PE=1 SV=2	3.06884e+06	1.82499e+06	8.59097e+07	2.57849e+07	4.41391e+07	Hnrnpd	38.3	21.2286	1		0	115.208	27	10	54	8	355	7.81	119.91	10	metabolic process;regulation of biological process;response to stimulus	cytoplasm;cytosol;nucleus	DNA binding;protein binding;RNA binding	Pf00076, Pf13893, Pf14259	11991	ENSMUSG00000000568.15	Hnrnpd	5		mRNA processing	mRNA Splicing - Major Pathway; AUF1 (hnRNP D0) binds and destabilizes mRNA	7
High	Q61205	10	Platelet-activating factor acetylhydrolase IB subunit gamma OS=Mus musculus GN=Pafah1b3 PE=1 SV=1	2.28975e+06	2.92783e+06	1.24335e+08	1.43062e+07	2.74622e+07	Pafah1b3	25.8	21.2235	1	Met-loss+Acetyl [N-Term]	0	109.812	63	10	28	10	232	6.93	81.52	10	metabolic process	cytoplasm;cytosol;membrane	catalytic activity;protein binding	Pf00657, Pf13472	18476	ENSMUSG00000005447.12	Pafah1b3	7	Metabolic pathways; Ether lipid metabolism		COPI-independent Golgi-to-ER retrograde traffic	7
High	Q9CZ30	17	Obg-like ATPase 1 OS=Mus musculus GN=Ola1 PE=1 SV=1	3.01497e+06	4.14512e+06	1.22984e+08	2.43772e+07	8.00592e+07	Ola1	44.7	21.1748	1		0	163.36	56	17	39	17	396	7.81	113.33	17	metabolic process	cytoplasm;cytosol;membrane;nucleus	catalytic activity;metal ion binding;nucleotide binding;protein binding	Pf01926, Pf02421, Pf06071	67059	ENSMUSG00000027108.15	Ola1	2			Platelet degranulation	4
High	Q3TYX3	3	SET and MYND domain-containing protein 5 OS=Mus musculus GN=Smyd5 PE=1 SV=2	441630	232515	8.35568e+06	5.63733e+06	7.01487e+06	Smyd5	47.1	20.7748	1		0	29.331	12	3	8	3	416	5.21	28.73	3	metabolic process		catalytic activity;metal ion binding;protein binding	Pf00856	232187	ENSMUSG00000033706.13	Smyd5	6				0
High	Q9DBR0	3	A-kinase anchor protein 8 OS=Mus musculus GN=Akap8 PE=1 SV=1	373180	15253.6	6.81348e+06	1.69582e+06	3.54235e+06	Akap8	76.2	20.6842	1		0	18.824	6	3	5	3	687	5.14	14.95	3	cell organization and biogenesis;defense response;metabolic process;regulation of biological process;response to stimulus;transport	chromosome;cytoplasm;Golgi;membrane;mitochondrion;nucleus	catalytic activity;DNA binding;metal ion binding;protein binding;RNA binding	Pf04988	56399	ENSMUSG00000024045.5	Akap8	17		G Protein Signaling Pathways; TNF-alpha NF-kB Signaling Pathway		2
High	Q6IRU2	15	Tropomyosin alpha-4 chain OS=Mus musculus GN=Tpm4 PE=1 SV=3	1.71769e+07	3.33469e+06	3.20734e+08	1.313e+08	1.83713e+08	Tpm4	28.5	20.663	1	Met-loss+Acetyl [N-Term]	0	195.597	56	16	73	15	248	4.68	247.76	16	cell differentiation;cell organization and biogenesis	cytoplasm;cytoskeleton;membrane	metal ion binding;protein binding;structural molecule activity	Pf00261, Pf12718	326618	ENSMUSG00000031799.9	Tpm4	8	Hypertrophic cardiomyopathy (HCM); Dilated cardiomyopathy; Cardiac muscle contraction; Adrenergic signaling in cardiomyocytes	Striated Muscle Contraction	Striated Muscle Contraction; Smooth Muscle Contraction	8
High	P11087	50	Collagen alpha-1(I) chain OS=Mus musculus GN=Col1a1 PE=1 SV=4	4.47646e+07	4.70685e+07	4.02992e+07	2.15552e+09	6.35877e+08	Col1a1	137.9	20.5568	1		0	737.287	63	51	198	50	1453	5.85	621.55	51	cell communication;cell differentiation;cell organization and biogenesis;metabolic process;regulation of biological process;response to stimulus;transport	cytoplasm;endoplasmic reticulum;extracellular;Golgi	metal ion binding;protein binding;structural molecule activity	Pf00093, Pf01391, Pf01410	12842	ENSMUSG00000001506.10	Col1a1	11	AGE-RAGE signaling pathway in diabetic complications; Focal adhesion; Protein digestion and absorption; Platelet activation; Proteoglycans in cancer; ECM-receptor interaction; PI3K-Akt signaling pathway; Amoebiasis	Osteoblast; Focal Adhesion-PI3K-Akt-mTOR-signaling pathway; Dysregulated miRNA Targeting in Insulin/PI3K-AKT Signaling; Inflammatory Response Pathway; Focal Adhesion	Anchoring fibril formation; ECM proteoglycans; Cell surface interactions at the vascular wall; Platelet Aggregation (Plug Formation); Integrin cell surface interactions; Collagen degradation; Immunoregulatory interactions between a Lymphoid and a non-Lymphoid cell; Crosslinking of collagen fibrils; Collagen chain trimerization; GP1b-IX-V activation signalling; Platelet Adhesion to exposed collage…	40
High	Q9WUA2	13	Phenylalanine--tRNA ligase beta subunit OS=Mus musculus GN=Farsb PE=1 SV=2	1.68567e+06	825959	3.44558e+07	1.66722e+07	2.58529e+07	Farsb	65.7	20.4332	1		0	89.059	29	13	30	13	589	7.12	82.86	13	cell organization and biogenesis;metabolic process	cytoplasm;membrane	catalytic activity;metal ion binding;nucleotide binding;RNA binding	Pf03483, Pf03484	23874	ENSMUSG00000026245.16	Farsb	1	Aminoacyl-tRNA biosynthesis			1
High	P62334	16	26S protease regulatory subunit 10B OS=Mus musculus GN=Psmc6 PE=1 SV=1	4.517e+06	1.28304e+06	60709858	4.8081e+07	6.734e+07	Psmc6	44.1	20.2448	1		0	96.173	51	16	31	16	389	7.49	78.83	16	metabolic process;regulation of biological process;response to stimulus	cytoplasm;membrane;nucleus;proteasome	catalytic activity;nucleotide binding;protein binding;RNA binding	Pf00004, Pf00910, Pf01078, Pf05496, Pf07724, Pf07726, Pf07728, Pf13191, Pf13207, Pf13401	67089	ENSMUSG00000021832.7	Psmc6	14	Proteasome; Epstein-Barr virus infection	Proteasome Degradation	The role of GTSE1 in G2/M progression after G2 checkpoint; CDT1 association with the CDC6:ORC:origin complex; Ubiquitin Mediated Degradation of Phosphorylated Cdc25A; RUNX1 regulates transcription of genes involved in differentiation of HSCs; Degradation of beta-catenin by the destruction complex; Autodegradation of the E3 ubiquitin ligase COP1; UCH proteinases; MAPK6/MAPK4 signaling; SCF-beta-Tr…	128
High	P07091	5	Protein S100-A4 OS=Mus musculus GN=S100a4 PE=1 SV=1	3.45986e+06	1.72242e+08	2.49592e+09	3.76814e+08	2.45077e+09	S100a4	11.7	20.1991	1	Met-loss+Acetyl [N-Term]	0	48.64	44	5	162	5	101	5.31	437.91	5	regulation of biological process	extracellular;nucleus	metal ion binding;protein binding;RNA binding	Pf01023	20198	ENSMUSG00000001020.8	S100a4	3				0
High	P60122	15	RuvB-like 1 OS=Mus musculus GN=Ruvbl1 PE=1 SV=1	6.87808e+06	352165	97232474	6.32161e+07	5.62617e+07	Ruvbl1	50.2	19.9818	1		0	154.462	49	15	50	15	456	6.42	137.75	15	cell division;cell organization and biogenesis;metabolic process;regulation of biological process;response to stimulus	cytosol;nucleus	catalytic activity;nucleotide binding;protein binding	Pf00004, Pf01078, Pf01695, Pf05496, Pf06068, Pf06414, Pf07726, Pf13191, Pf13238, Pf13245, Pf13481	56505	ENSMUSG00000030079.15	Ruvbl1	6	Wnt signaling pathway	Wnt Signaling Pathway NetPath	DNA Damage Recognition in GG-NER; Ub-specific processing proteases; UCH proteinases; Deposition of new CENPA-containing nucleosomes at the centromere; Formation of the beta-catenin:TCF transactivating complex	19
High	O88685	11	26S protease regulatory subunit 6A OS=Mus musculus GN=Psmc3 PE=1 SV=2	3.76455e+06	1.51314e+06	4.695e+07	4.09311e+07	6.93263e+07	Psmc3	49.5	19.8581	1		0	100.678	36	11	33	11	442	5.19	100.11	11	metabolic process;regulation of biological process;response to stimulus	cytoplasm;membrane;nucleus;proteasome	catalytic activity;nucleotide binding;protein binding	Pf00004, Pf01078, Pf05496, Pf07724, Pf07728, Pf13191	19182	ENSMUSG00000002102.15	Psmc3	2	Proteasome; Epstein-Barr virus infection	TNF-alpha NF-kB Signaling Pathway; Proteasome Degradation	The role of GTSE1 in G2/M progression after G2 checkpoint; CDT1 association with the CDC6:ORC:origin complex; Ubiquitin Mediated Degradation of Phosphorylated Cdc25A; RUNX1 regulates transcription of genes involved in differentiation of HSCs; Degradation of beta-catenin by the destruction complex; Autodegradation of the E3 ubiquitin ligase COP1; UCH proteinases; MAPK6/MAPK4 signaling; SCF-beta-Tr…	130
High	Q6P9R2	9	Serine/threonine-protein kinase OSR1 OS=Mus musculus GN=Oxsr1 PE=1 SV=1	897247	646431	2.02534e+07	1.17915e+07	1.37492e+07	Oxsr1	58.2	19.777	1		0	46.631	20	9	18	9	527	6.43	37.23	9	metabolic process;regulation of biological process;response to stimulus	cytoplasm;cytosol	catalytic activity;metal ion binding;nucleotide binding;protein binding;signal transducer activity	Pf00069, Pf07714, Pf12202	108737	ENSMUSG00000036737.12	Oxsr1	9				0
High	O08583	6	THO complex subunit 4 OS=Mus musculus GN=Alyref PE=1 SV=3	4.51172e+06	2.7382e+06	1.01683e+08	3.14462e+07	8.09908e+07	Alyref	26.9	19.6894	1		0	84.106	39	6	24	6	255	11.15	84.38	6	metabolic process;transport	cytoplasm;nucleus;spliceosomal complex	DNA binding;RNA binding	Pf00076, Pf13893, Pf14259	21681	ENSMUSG00000025134.2	Alyref	11	mRNA surveillance pathway; Herpes simplex infection; Spliceosome; RNA transport	mRNA processing		5
High	P09405	22	Nucleolin OS=Mus musculus GN=Ncl PE=1 SV=2	8.75261e+07	7.03071e+07	2.38407e+09	9.10964e+08	1.3552e+09	Ncl	76.7	19.642	1		0	172.026	31	22	283	22	707	4.75	650.89	22	regulation of biological process;response to stimulus;transport	cell surface;cytoplasm;membrane;nucleus	DNA binding;metal ion binding;protein binding;RNA binding	Pf00076, Pf13893, Pf14259	17975	ENSMUSG00000026234.12	Ncl	1		PluriNetWork; mRNA processing	Major pathway of rRNA processing in the nucleolus and cytosol	6
High	P12970	14	60S ribosomal protein L7a OS=Mus musculus GN=Rpl7a PE=1 SV=2	9.40949e+06	5.62543e+06	2.63107e+08	1.53639e+08	2.16903e+07	Rpl7a	30	19.4408	1		0	90.007	53	14	34	14	266	10.56	78.81	14	metabolic process	cytoplasm;membrane;nucleus;ribosome	protein binding;RNA binding	Pf01248	27176	ENSMUSG00000062647.16	Rpl7a	2	Ribosome	Cytoplasmic Ribosomal Proteins	L13a-mediated translational silencing of Ceruloplasmin expression; Nonsense Mediated Decay (NMD) independent of the Exon Junction Complex (EJC); Nonsense Mediated Decay (NMD) enhanced by the Exon Junction Complex (EJC); GTP hydrolysis and joining of the 60S ribosomal subunit; Formation of a pool of free 40S subunits; Major pathway of rRNA processing in the nucleolus and cytosol; SRP-dependent cot…	17
High	P38647	23	Stress-70 protein, mitochondrial OS=Mus musculus GN=Hspa9 PE=1 SV=3	3.00776e+06	7.80668e+06	6.11879e+07	6.36052e+07	1.9007e+08	Hspa9	73.4	19.41	1		0	178.91	46	23	48	23	679	6.07	125.63	23	cell differentiation;cell organization and biogenesis;metabolic process;regulation of biological process;transport	cytoplasm;mitochondrion;nucleus;organelle lumen	nucleotide binding;protein binding;RNA binding	Pf00012, Pf06723	15526	ENSMUSG00000024359.8	Hspa9	18	RNA degradation; Tuberculosis			2
High	Q9QZ88	7	Vacuolar protein sorting-associated protein 29 OS=Mus musculus GN=Vps29 PE=1 SV=1	1.32072e+06	1.50828e+06	3.91329e+07	1.29461e+07	2.96244e+07	Vps29	20.5	19.2537	1		0	47.486	53	7	16	7	182	6.79	26.55	7	transport	cytoplasm;cytosol;endosome;membrane	catalytic activity;metal ion binding;protein binding;transporter activity	Pf00149, Pf12850	56433	ENSMUSG00000029462.18	Vps29	5	Endocytosis		WNT ligand biogenesis and trafficking	4
High	Q91YR9	13	Prostaglandin reductase 1 OS=Mus musculus GN=Ptgr1 PE=1 SV=2	4.87735e+06	528467	7.4048e+07	1.68751e+07	6.50113e+07	Ptgr1	35.5	19.2304	1		0	148.761	63	13	27	13	329	7.96	88.33	13	metabolic process;response to stimulus	cytoplasm	catalytic activity	Pf00107	67103	ENSMUSG00000028378.6	Ptgr1	4				0
High	Q8BG05	12	Heterogeneous nuclear ribonucleoprotein A3 OS=Mus musculus GN=Hnrnpa3 PE=1 SV=1	8.39457e+06	4.37304e+06	2.54775e+08	4.41148e+07	6.90736e+07	Hnrnpa3	39.6	19.2134	1		0	129.302	37	13	47	12	379	9.01	128.76	13	metabolic process;transport	cytoplasm;nucleus;spliceosomal complex	RNA binding;transporter activity	Pf00076, Pf13893, Pf14259	229279	ENSMUSG00000059005.13	Hnrnpa3	2	Spliceosome	mRNA processing		2
High	P47955	4	60S acidic ribosomal protein P1 OS=Mus musculus GN=Rplp1 PE=1 SV=1	1.5104e+06	8.17224e+06	1.11084e+08	4.98562e+07	1.15774e+08	Rplp1	11.5	19.0523	1	Met-loss+Acetyl [N-Term]	0	72.014	90	4	22	4	114	4.32	106.47	4	metabolic process;regulation of biological process	ribosome	enzyme regulator activity;structural molecule activity	Pf00428	56040	ENSMUSG00000007892.8	Rplp1	9	Ribosome	Cytoplasmic Ribosomal Proteins	L13a-mediated translational silencing of Ceruloplasmin expression; Nonsense Mediated Decay (NMD) independent of the Exon Junction Complex (EJC); Nonsense Mediated Decay (NMD) enhanced by the Exon Junction Complex (EJC); GTP hydrolysis and joining of the 60S ribosomal subunit; Formation of a pool of free 40S subunits; Major pathway of rRNA processing in the nucleolus and cytosol; SRP-dependent cot…	17
High	P56812	6	Programmed cell death protein 5 OS=Mus musculus GN=Pdcd5 PE=1 SV=3	2.80078e+06	133381	4.70155e+07	1.02097e+07	2.60215e+07	Pdcd5	14.3	18.9144	1	Met-loss+Acetyl [N-Term]	0	32.629	56	6	14	6	126	5.68	19.19	6	cell death;regulation of biological process;response to stimulus	cytoplasm;cytosol;nucleus	DNA binding;enzyme regulator activity;protein binding	Pf01984	100042424; 56330	ENSMUSG00000030417.15	Gm3837; Pdcd5-ps; Pdcd5	1; 7				0
High	Q62167	13	ATP-dependent RNA helicase DDX3X OS=Mus musculus GN=Ddx3x PE=1 SV=3	270892	2.44303e+06	2.48305e+07	3.13068e+07	2.07597e+07	Ddx3x	73.1	18.8895	1		0	89.489	27	14	31	13	662	7.18	69.72	14	cell death;cell organization and biogenesis;defense response;metabolic process;regulation of biological process;response to stimulus	cytoplasm;cytosol;membrane;mitochondrion;nucleus	catalytic activity;DNA binding;enzyme regulator activity;nucleotide binding;protein binding;RNA binding	Pf00270, Pf00271, Pf04851	13205	ENSMUSG00000000787.12	Ddx3x	X	RIG-I-like receptor signaling pathway; Hepatitis B; Viral carcinogenesis	TNF-alpha NF-kB Signaling Pathway; mRNA processing	Neutrophil degranulation	8
High	Q61553	25	Fascin OS=Mus musculus GN=Fscn1 PE=1 SV=4	1.8762e+07	2.92801e+06	2.0795e+08	1.69875e+08	2.33532e+08	Fscn1	54.5	18.7908	1	Met-loss+Acetyl [N-Term]	0	241.319	69	25	76	25	493	6.89	210.5	25	cell organization and biogenesis;cellular component movement;regulation of biological process	cytoplasm;cytoskeleton;cytosol;membrane	protein binding;RNA binding	Pf06229, Pf06268	14086	ENSMUSG00000029581.14	Fscn1	5				0
High	Q9CWZ3	6	RNA-binding protein 8A OS=Mus musculus GN=Rbm8a PE=1 SV=4	2.17774e+06	3.97222e+06	8.71305e+07	2.98158e+07	5.43683e+07	Rbm8a	19.9	18.5708	1	Met-loss+Acetyl [N-Term]	0	46.484	56	6	16	6	174	5.72	54.01	6	metabolic process;regulation of biological process;transport	cytoplasm;nucleus;spliceosomal complex	RNA binding	Pf00076, Pf08777, Pf13893, Pf14259	60365	ENSMUSG00000038374.10	Rbm8a	3	mRNA surveillance pathway; Spliceosome; RNA transport	mRNA processing	mRNA Splicing - Major Pathway; mRNA 3'-end processing; Nonsense Mediated Decay (NMD) enhanced by the Exon Junction Complex (EJC); Cleavage of Growing Transcript in the Termination Region ; Transport of Mature mRNA derived from an Intron-Containing Transcript	17
High	Q9WVA3	8	Mitotic checkpoint protein BUB3 OS=Mus musculus GN=Bub3 PE=1 SV=2	2.19884e+06	804979	40476780	1.57564e+07	2.58918e+07	Bub3	36.9	18.2268	1		0	57.583	38	8	18	8	326	6.84	47.33	8	cell division;cell organization and biogenesis;metabolic process;regulation of biological process	chromosome;nucleus	protein binding	Pf00400, Pf04762	12237	ENSMUSG00000066979.6	Bub3	7	HTLV-I infection; Cell cycle		Inactivation of APC/C via direct inhibition of the APC/C complex; Cdc20:Phospho-APC/C mediated degradation of Cyclin A; Amplification of signal from unattached kinetochores via a MAD2 inhibitory signal; Resolution of Sister Chromatid Cohesion; Separation of Sister Chromatids; RHO GTPases Activate Formins; APC-Cdc20 mediated degradation of Nek2A	28
High	P27659	15	60S ribosomal protein L3 OS=Mus musculus GN=Rpl3 PE=1 SV=3	1.34887e+07	6.6804e+06	3.50482e+08	1.8114e+08	1.03812e+07	Rpl3	46.1	17.9153	1		0	128.951	47	15	41	15	403	10.21	102.32	15	cell organization and biogenesis;metabolic process;response to stimulus	cytoplasm;cytosol;nucleus;ribosome	RNA binding;structural molecule activity	Pf00297	27367	ENSMUSG00000060036.13	Rpl3	15	Ribosome	Cytoplasmic Ribosomal Proteins	L13a-mediated translational silencing of Ceruloplasmin expression; Nonsense Mediated Decay (NMD) independent of the Exon Junction Complex (EJC); Nonsense Mediated Decay (NMD) enhanced by the Exon Junction Complex (EJC); GTP hydrolysis and joining of the 60S ribosomal subunit; Formation of a pool of free 40S subunits; Major pathway of rRNA processing in the nucleolus and cytosol; SRP-dependent cot…	17
High	P26369	10	Splicing factor U2AF 65 kDa subunit OS=Mus musculus GN=U2af2 PE=1 SV=3	5.24256e+06	4.67659e+06	1.03915e+08	6.66113e+07	9.59764e+07	U2af2	53.5	17.9116	1		0	112.835	37	10	45	10	475	9.09	129.71	10	metabolic process;regulation of biological process	nucleus;spliceosomal complex	protein binding;RNA binding	Pf00076, Pf13893, Pf14259	22185	ENSMUSG00000030435.16	U2af2	7	Spliceosome	mRNA processing	mRNA Splicing - Major Pathway; mRNA 3'-end processing; Cleavage of Growing Transcript in the Termination Region ; Transport of Mature mRNA derived from an Intron-Containing Transcript	13
High	P20152	41	Vimentin OS=Mus musculus GN=Vim PE=1 SV=3	3.58538e+08	2.04096e+08	8.16384e+09	3.56363e+09	3.09133e+09	Vim	53.7	17.5588	1		0	534.639	75	43	708	41	466	5.12	1666.38	43	cell differentiation;cell organization and biogenesis;metabolic process;regulation of biological process;response to stimulus	cytoplasm;cytoskeleton;cytosol;membrane	protein binding;RNA binding;structural molecule activity	Pf00038, Pf04111, Pf04156, Pf04732, Pf05622, Pf10186	22352	ENSMUSG00000026728.9	Vim	2	MicroRNAs in cancer; Epstein-Barr virus infection	Striated Muscle Contraction; Spinal Cord Injury; Primary Focal Segmental Glomerulosclerosis FSGS; Alpha6-Beta4 Integrin Signaling Pathway	Striated Muscle Contraction; Caspase-mediated cleavage of cytoskeletal proteins	13
High	Q62433	8	Protein NDRG1 OS=Mus musculus GN=Ndrg1 PE=1 SV=1	2.60671e+06	739717	6.90763e+07	4.4869e+06	1.44635e+07	Ndrg1	43	17.5364	1		0	99.449	40	8	16	8	394	6.1	55.67	8	cell organization and biogenesis;regulation of biological process;response to stimulus	cytoplasm;cytoskeleton;cytosol;membrane;nucleus	protein binding	Pf00561, Pf03096, Pf12697	17988	ENSMUSG00000005125.12	Ndrg1	15				0
High	P10518	8	Delta-aminolevulinic acid dehydratase OS=Mus musculus GN=Alad PE=1 SV=1	699970	1.20216e+06	2.0354e+07	3.85192e+06	2.58236e+07	Alad	36	17.5345	1		0	56.601	35	8	20	8	330	6.79	57.78	8	cell organization and biogenesis;metabolic process;regulation of biological process;response to stimulus	cytosol;nucleus	catalytic activity;metal ion binding;protein binding	Pf00490	17025	ENSMUSG00000028393.10	Alad	4	Metabolic pathways; Porphyrin and chlorophyll metabolism	Heme Biosynthesis	Neutrophil degranulation; Heme biosynthesis	9
High	Q60749	5	KH domain-containing, RNA-binding, signal transduction-associated protein 1 OS=Mus musculus GN=Khdrbs1 PE=1 SV=2	3.37313e+06	684459	4.48769e+07	2.45983e+07	3.68708e+07	Khdrbs1	48.3	17.4728	1		0	26.676	14	5	10	5	443	8.72	6.49	5	cell organization and biogenesis;metabolic process;regulation of biological process;response to stimulus	cytoplasm;membrane;nucleus	protein binding;RNA binding	Pf00013, Pf13014	20218	ENSMUSG00000028790.13	Khdrbs1	4			PTK6 Regulates Proteins Involved in RNA Processing	4
High	Q64514	27	Tripeptidyl-peptidase 2 OS=Mus musculus GN=Tpp2 PE=1 SV=3	3.95052e+06	3.93225e+06	5.76334e+07	4.72493e+07	1.0128e+08	Tpp2	139.8	17.4357	1	Met-loss+Acetyl [N-Term]	0	160.246	31	27	56	27	1262	6.58	127.77	27	metabolic process	cytoplasm;cytosol;nucleus	catalytic activity;protein binding	Pf00082, Pf12580, Pf13739	22019	ENSMUSG00000041763.14	Tpp2	1			Antigen processing: Ubiquitination & Proteasome degradation	4
High	Q9JK81	14	UPF0160 protein MYG1, mitochondrial OS=Mus musculus GN=Myg1 PE=1 SV=1	1.26628e+06	2.87099e+06	66637499	1.08818e+07	3.06537e+07	Myg1	42.7	17.4307	1		0	130.478	61	14	29	14	380	7.02	85.26	14	response to stimulus	mitochondrion;nucleus		Pf03690	60315	ENSMUSG00000001285.12	Myg1	15				0
High	Q8BGD9	14	Eukaryotic translation initiation factor 4B OS=Mus musculus GN=Eif4b PE=1 SV=1	830403	3.25825e+06	5.95726e+07	1.42256e+07	3.29996e+07	Eif4b	68.8	17.4137	1		0	92.885	29	14	28	14	611	5.67	72.16	14	cell organization and biogenesis;metabolic process		RNA binding	Pf00076, Pf14259	75705	ENSMUSG00000058655.8	Eif4b	15	mTOR signaling pathway; Proteoglycans in cancer; PI3K-Akt signaling pathway; RNA transport	Focal Adhesion-PI3K-Akt-mTOR-signaling pathway; Translation Factors	L13a-mediated translational silencing of Ceruloplasmin expression; mTORC1-mediated signalling; Ribosomal scanning and start codon recognition; GTP hydrolysis and joining of the 60S ribosomal subunit; Translation initiation complex formation; Deadenylation of mRNA	21
High	O70251	8	Elongation factor 1-beta OS=Mus musculus GN=Eef1b PE=1 SV=5	1.59929e+07	6.55958e+06	303554328	1.22249e+08	1.62403e+08	Eef1b	24.7	17.3878	1		0	154.985	67	9	57	8	225	4.69	233.67	9	metabolic process;response to stimulus	cytoplasm;endoplasmic reticulum	protein binding;RNA binding	Pf00736, Pf14497	55949	ENSMUSG00000025967.16	Eef1b2	1		Translation Factors	Eukaryotic Translation Elongation	4
High	Q9EQU5	13	Protein SET OS=Mus musculus GN=Set PE=1 SV=1	4.30586e+07	4.83504e+07	1.33344e+09	4.66786e+08	5.79376e+08	Set	33.4	17.355	1		0	256.752	54	13	109	13	289	4.32	419.54	13	cell organization and biogenesis;regulation of biological process	cytoplasm;cytosol;endoplasmic reticulum;nucleus	DNA binding	Pf00956	56086	ENSMUSG00000054766.13	Set	2			HuR (ELAVL1) binds and stabilizes mRNA; Condensation of Prophase Chromosomes	8
High	O08529	26	Calpain-2 catalytic subunit OS=Mus musculus GN=Capn2 PE=1 SV=4	7.69447e+06	4.83788e+06	1.16589e+08	9.00056e+07	1.19553e+08	Capn2	79.8	17.3496	1		0	216.352	53	26	58	26	700	4.96	179.89	26	metabolic process;regulation of biological process;response to stimulus	chromosome;cytoplasm;cytosol;endoplasmic reticulum;Golgi;membrane;nucleus;vacuole	catalytic activity;metal ion binding;protein binding	Pf00648, Pf01067, Pf13833	12334	ENSMUSG00000026509.15	Capn2	1	Focal adhesion; Alzheimer's disease; Protein processing in endoplasmic reticulum; Apoptosis	Alzheimers Disease; Integrin-mediated Cell Adhesion	Degradation of the extracellular matrix	8
High	P62889	6	60S ribosomal protein L30 OS=Mus musculus GN=Rpl30 PE=1 SV=2	4.24754e+06	3.17552e+06	1.13289e+08	4.40953e+07	3.43769e+07	Rpl30	12.8	17.2222	1		0	67.477	51	6	29	6	115	9.63	85.66	6	defense response;metabolic process;response to stimulus	membrane;nucleus;ribosome	RNA binding;structural molecule activity	Pf01248	19946; 667779; 666899	ENSMUSG00000058600.13	Rpl30; Rpl30-ps8; Gm12191	15; 12; 11	Ribosome	Selenium metabolism/Selenoproteins; Cytoplasmic Ribosomal Proteins; TNF-alpha NF-kB Signaling Pathway	L13a-mediated translational silencing of Ceruloplasmin expression; Nonsense Mediated Decay (NMD) independent of the Exon Junction Complex (EJC); Nonsense Mediated Decay (NMD) enhanced by the Exon Junction Complex (EJC); GTP hydrolysis and joining of the 60S ribosomal subunit; Formation of a pool of free 40S subunits; Major pathway of rRNA processing in the nucleolus and cytosol; SRP-dependent cot…	19
High	Q3UDE2	13	Tubulin--tyrosine ligase-like protein 12 OS=Mus musculus GN=Ttll12 PE=1 SV=1	2.2896e+06	856687	2.61969e+07	2.47875e+07	2.98305e+07	Ttll12	74	17.1238	1		0	104.467	33	13	23	13	639	5.63	54.51	13	metabolic process		catalytic activity;nucleotide binding	Pf03133	223723	ENSMUSG00000016757.10	Ttll12	15				0
High	Q9D1M0	7	Protein SEC13 homolog OS=Mus musculus GN=Sec13 PE=1 SV=3	1.00237e+06	1.22113e+06	2.45624e+07	1.09934e+07	2.14996e+07	Sec13	35.5	17.1068	1	Met-loss+Acetyl [N-Term]	0	66.175	36	7	13	7	322	5.38	37.56	7	cell organization and biogenesis;regulation of biological process;transport	chromosome;cytosol;endoplasmic reticulum;membrane;nucleus;vacuole	protein binding	Pf00400	110379	ENSMUSG00000030298.10	Sec13	6	mTOR signaling pathway; RNA transport; Protein processing in endoplasmic reticulum		Amplification of signal from unattached kinetochores via a MAD2 inhibitory signal; Resolution of Sister Chromatid Cohesion; Separation of Sister Chromatids; RHO GTPases Activate Formins; Antigen Presentation: Folding, assembly and peptide loading of class I MHC; MHC class II antigen presentation; COPII (Coat Protein 2) Mediated Vesicle Transport	32
High	Q64674	16	Spermidine synthase OS=Mus musculus GN=Srm PE=1 SV=1	5.73695e+06	8.073e+06	1.83398e+08	3.52701e+07	1.33679e+08	Srm	34	17.0094	1		0	159.465	73	16	39	16	302	5.5	122.4	16	metabolic process		catalytic activity;protein binding	Pf01564, Pf13847	20810	ENSMUSG00000006442.10	Srm	4	Glutathione metabolism; Arginine and proline metabolism; Metabolic pathways; Cysteine and methionine metabolism; beta-Alanine metabolism	Nucleotide Metabolism	Metabolism of polyamines	9
High	Q8BH58	7	TIP41-like protein OS=Mus musculus GN=Tiprl PE=1 SV=1	953281	1.56404e+06	4.09758e+07	6.63729e+06	1.63471e+07	Tiprl	31.2	16.9387	1	Met-loss+Acetyl [N-Term]	0	57.632	46	7	9	7	271	5.63	28.55	7	regulation of biological process;response to stimulus	cytoplasm		Pf04176	226591	ENSMUSG00000040843.10	Tiprl	1				0
High	Q9D0E1	16	Heterogeneous nuclear ribonucleoprotein M OS=Mus musculus GN=Hnrnpm PE=1 SV=3	3.23472e+06	1.55081e+06	5.39274e+07	1.85804e+07	4.7992e+07	Hnrnpm	77.6	16.7867	1	Met-loss+Acetyl [N-Term]	0	115.582	35	16	33	16	729	8.63	93.99	16	metabolic process;regulation of biological process	cell surface;membrane;nucleus;spliceosomal complex	protein binding;RNA binding	Pf00076, Pf11532, Pf11608, Pf13893, Pf14259	76936	ENSMUSG00000059208.14	Hnrnpm	17	Spliceosome	mRNA processing	mRNA Splicing - Major Pathway; FGFR2 alternative splicing	11
High	P47911	15	60S ribosomal protein L6 OS=Mus musculus GN=Rpl6 PE=1 SV=3	7.2714e+06	6.94811e+06	1.76456e+08	1.64091e+08	1.59727e+07	Rpl6	33.5	16.7151	1		0	91.134	44	15	50	15	296	10.7	87.86	15	cell organization and biogenesis;metabolic process	cytoplasm;membrane;nucleus;ribosome	protein binding;RNA binding;structural molecule activity	Pf01159, Pf03868	19988	ENSMUSG00000029614.13	Rpl6	5	Ribosome	Cytoplasmic Ribosomal Proteins; TNF-alpha NF-kB Signaling Pathway	L13a-mediated translational silencing of Ceruloplasmin expression; Nonsense Mediated Decay (NMD) independent of the Exon Junction Complex (EJC); Nonsense Mediated Decay (NMD) enhanced by the Exon Junction Complex (EJC); GTP hydrolysis and joining of the 60S ribosomal subunit; Formation of a pool of free 40S subunits; Major pathway of rRNA processing in the nucleolus and cytosol; SRP-dependent cot…	18
High	Q99KJ8	10	Dynactin subunit 2 OS=Mus musculus GN=Dctn2 PE=1 SV=3	2.39951e+06	581420	4.09768e+07	1.27543e+07	2.03141e+07	Dctn2	44.1	16.5597	1		0	83.765	36	10	24	10	402	5.26	68.26	10	cell organization and biogenesis;cell proliferation;transport	chromosome;cytoplasm;cytoskeleton;cytosol;membrane	catalytic activity;motor activity;protein binding	Pf04912	69654	ENSMUSG00000025410.10	Dctn2	10	Huntington's disease; Vasopressin-regulated water reabsorption		Anchoring of the basal body to the plasma membrane; AURKA Activation by TPX2; Loss of Nlp from mitotic centrosomes; Recruitment of mitotic centrosome proteins and complexes; COPI-mediated anterograde transport; Regulation of PLK1 Activity at G2/M Transition; Recruitment of NuMA to mitotic centrosomes; HSP90 chaperone cycle for steroid hormone receptors (SHR); COPI-independent Golgi-to-ER retrogra…	35
High	P62270	8	40S ribosomal protein S18 OS=Mus musculus GN=Rps18 PE=1 SV=3	6.36839e+06	3.46536e+06	132848264	7.80634e+07	3.13323e+07	Rps18	17.7	16.4226	1		0	50.585	49	8	38	8	152	10.99	66.93	8	metabolic process	cytoplasm;cytosol;membrane;nucleus;ribosome	protein binding;RNA binding;structural molecule activity	Pf00416	20084	ENSMUSG00000008668.14	Rps18	17	Ribosome	Cytoplasmic Ribosomal Proteins	L13a-mediated translational silencing of Ceruloplasmin expression; Nonsense Mediated Decay (NMD) independent of the Exon Junction Complex (EJC); Nonsense Mediated Decay (NMD) enhanced by the Exon Junction Complex (EJC); Ribosomal scanning and start codon recognition; GTP hydrolysis and joining of the 60S ribosomal subunit; Formation of a pool of free 40S subunits; SRP-dependent cotranslational pr…	18
High	Q9CZM2	7	60S ribosomal protein L15 OS=Mus musculus GN=Rpl15 PE=2 SV=4	6.08367e+06	4.18711e+06	1.52486e+08	8.41788e+07	3.78677e+06	Rpl15	24.1	15.6075	1		0	33.105	32	7	26	7	204	11.62	62.91	7	metabolic process	membrane;nucleus;ribosome	protein binding;RNA binding;structural molecule activity	Pf00827	66480	ENSMUSG00000012405.15	Rpl15	14	Ribosome	Cytoplasmic Ribosomal Proteins	L13a-mediated translational silencing of Ceruloplasmin expression; Nonsense Mediated Decay (NMD) independent of the Exon Junction Complex (EJC); Nonsense Mediated Decay (NMD) enhanced by the Exon Junction Complex (EJC); GTP hydrolysis and joining of the 60S ribosomal subunit; Formation of a pool of free 40S subunits; Major pathway of rRNA processing in the nucleolus and cytosol; SRP-dependent cot…	17
High	Q64737	27	Trifunctional purine biosynthetic protein adenosine-3 OS=Mus musculus GN=Gart PE=1 SV=3	7.29953e+06	4.98577e+06	1.23038e+08	5.21431e+07	1.11999e+08	Gart	107.4	15.5839	1		0	215.712	44	27	67	27	1010	6.68	207.28	27	metabolic process;response to stimulus	cytoplasm	catalytic activity;metal ion binding;nucleotide binding	Pf00551, Pf00586, Pf01071, Pf02222, Pf02769, Pf02843, Pf02844, Pf08442, Pf13535, Pf15632	14450	ENSMUSG00000022962.14	Gart	16	Metabolic pathways; Purine metabolism; Antifolate resistance; One carbon pool by folate	Purine metabolism; One Carbon Metabolism	Purine ribonucleoside monophosphate biosynthesis	10
High	Q9CZX8	7	40S ribosomal protein S19 OS=Mus musculus GN=Rps19 PE=1 SV=3	5.54579e+06	2.32759e+06	1.44641e+08	2.86581e+07	8.5847e+06	Rps19	16.1	15.4008	1		0	40.328	46	7	25	7	145	10.4	43.19	7	cell differentiation;cell organization and biogenesis;cellular component movement;defense response;metabolic process;regulation of biological process;response to stimulus	cytoplasm;cytosol;membrane;ribosome	protein binding;RNA binding;structural molecule activity	Pf01090	20085	ENSMUSG00000040952.16	Rps19	7	Ribosome	Cytoplasmic Ribosomal Proteins	L13a-mediated translational silencing of Ceruloplasmin expression; Nonsense Mediated Decay (NMD) independent of the Exon Junction Complex (EJC); Nonsense Mediated Decay (NMD) enhanced by the Exon Junction Complex (EJC); Ribosomal scanning and start codon recognition; GTP hydrolysis and joining of the 60S ribosomal subunit; Formation of a pool of free 40S subunits; SRP-dependent cotranslational pr…	18
High	Q99J09	5	Methylosome protein 50 OS=Mus musculus GN=Wdr77 PE=1 SV=1	1.22655e+06	263067	1.5974e+07	1.16362e+07	6.43635e+06	Wdr77	36.9	15.2373	1		0	49.764	30	5	11	5	342	5.27	35.02	5	cell differentiation;regulation of biological process	cytoplasm;cytosol;Golgi;nucleus	DNA binding;nucleotide binding;protein binding	Pf00400, Pf11768	70465	ENSMUSG00000000561.14	Wdr77	3			RMTs methylate histone arginines; snRNP Assembly	6
High	Q8CGC7	40	Bifunctional glutamate/proline--tRNA ligase OS=Mus musculus GN=Eprs PE=1 SV=4	1.3723e+07	4.7154e+06	1.71926e+08	1.07004e+08	1.40038e+08	Eprs	170	15.1484	1	Met-loss+Acetyl [N-Term]	0	342.242	40	40	85	40	1512	7.66	241.29	40	metabolic process;regulation of biological process;response to stimulus	cytoplasm;cytosol;membrane	catalytic activity;metal ion binding;nucleotide binding;protein binding;RNA binding	Pf00458, Pf00587, Pf00749, Pf01406, Pf03129, Pf03950, Pf09180, Pf14497	107508	ENSMUSG00000026615.14	Eprs	1	Metabolic pathways; Aminoacyl-tRNA biosynthesis; Porphyrin and chlorophyll metabolism	Parkinsons Disease Pathway		4
High	Q8C0C7	8	Phenylalanine--tRNA ligase alpha subunit OS=Mus musculus GN=Farsa PE=1 SV=1	1.99597e+06	320897	2.67827e+07	1.22091e+07	1.35809e+07	Farsa	57.6	15.1275	1	Met-loss+Acetyl [N-Term]	0	55.234	27	8	11	8	508	8.28	33.68	8	cell organization and biogenesis;metabolic process	cytoplasm;membrane	catalytic activity;nucleotide binding;RNA binding	Pf00152, Pf01409, Pf08279	66590	ENSMUSG00000003808.18	Farsa	8	Aminoacyl-tRNA biosynthesis			1
High	Q8CG14	16	Complement C1s-A subcomponent OS=Mus musculus GN=C1sa PE=2 SV=2	3.7971e+06	6.50265e+06	1.15725e+08	7.76958e+06	1.09919e+08	C1sa	76.8	15.108	1		0	132.268	33	16	36	16	688	5.08	95.02	16	defense response;metabolic process;regulation of biological process;response to stimulus	extracellular	catalytic activity;metal ion binding;protein binding	Pf00084, Pf00089, Pf00431, Pf07645, Pf14670	50908		C1s; C1s1	6	Staphylococcus aureus infection; Complement and coagulation cascades; Pertussis; Systemic lupus erythematosus	Oxidative Damage; Complement Activation, Classical Pathway; Complement and Coagulation Cascades		7
High	P24452	8	Macrophage-capping protein OS=Mus musculus GN=Capg PE=1 SV=2	6.08383e+06	2.66696e+07	4.21774e+08	5.87637e+07	2.51787e+08	Capg	39.2	14.9058	1		0	98.261	43	8	38	8	352	7.2	103.02	8	cell organization and biogenesis;regulation of biological process	cytoplasm;extracellular;nucleus	protein binding	Pf00626	12332		Capg	6				0
High	Q9R1T2	17	SUMO-activating enzyme subunit 1 OS=Mus musculus GN=Sae1 PE=1 SV=1	7.46171e+06	3.09829e+06	1.10981e+08	5.69521e+07	6.61404e+07	Sae1	38.6	14.7774	1		0	174.148	61	17	51	17	350	5.36	125.03	17	metabolic process	cytoplasm;nucleus	catalytic activity;protein binding	Pf00899	56459	ENSMUSG00000052833.9	Sae1	7	Ubiquitin mediated proteolysis		SUMO is transferred from E1 to E2 (UBE2I, UBC9); SUMO is conjugated to E1 (UBA2:SAE1)	7
High	Q61035	17	Histidine--tRNA ligase, cytoplasmic OS=Mus musculus GN=Hars PE=1 SV=2	6.42327e+06	5.75268e+06	1.24405e+08	5.86874e+07	8.62295e+07	Hars	57.4	14.7461	1		0	108.152	41	17	42	17	509	6	102.29	17	cell organization and biogenesis;metabolic process	cytoplasm;cytosol;mitochondrion	catalytic activity;nucleotide binding;protein binding	Pf00458, Pf00587, Pf03129, Pf13393	15115	ENSMUSG00000001380.6	Hars	18	Aminoacyl-tRNA biosynthesis			1
High	Q80XU3	6	Nuclear ubiquitous casein and cyclin-dependent kinase substrate 1 OS=Mus musculus GN=Nucks1 PE=1 SV=1	2.60786e+06	948652	4.29113e+07	1.42983e+07	2.13655e+07	Nucks1	26.3	14.7289	1		0	65.294	33	6	13	6	234	5.14	36.47	6	cell organization and biogenesis;cellular homeostasis;metabolic process;regulation of biological process;response to stimulus	chromosome;cytoplasm;nucleus	DNA binding;protein binding;RNA binding		98415	ENSMUSG00000026434.12	Nucks1	1				0
High	P61759	5	Prefoldin subunit 3 OS=Mus musculus GN=Vbp1 PE=1 SV=2	1.38455e+06	383298	2.0046e+07	6.25623e+06	1.24415e+07	Vbp1	22.4	14.6105	1		0	35.696	46	5	10	5	196	6.28	25.07	5	cell organization and biogenesis;metabolic process	cytoplasm;cytosol;nucleus	protein binding	Pf02996	22327	ENSMUSG00000031197.11	Vbp1	X				0
High	Q9WUA3	9	ATP-dependent 6-phosphofructokinase, platelet type OS=Mus musculus GN=Pfkp PE=1 SV=1	1.08123e+06	1.27147e+06	1.30167e+07	1.53579e+07	2.31602e+07	Pfkp	85.4	14.603	1		0	96.24	21	11	15	9	784	7.11	44.14	11	cell organization and biogenesis;metabolic process	cytoplasm;cytosol;membrane;nucleus	catalytic activity;metal ion binding;nucleotide binding;protein binding	Pf00365	56421	ENSMUSG00000021196.13	Pfkp	13	RNA degradation; Metabolic pathways; Biosynthesis of amino acids; Glycolysis / Gluconeogenesis; Thyroid hormone signaling pathway; Pentose phosphate pathway; AMPK signaling pathway; Carbon metabolism; Fructose and mannose metabolism; Galactose metabolism; Central carbon metabolism in cancer	Glycolysis and Gluconeogenesis	Glycolysis	16
High	Q8BVI4	7	Dihydropteridine reductase OS=Mus musculus GN=Qdpr PE=1 SV=2	2.61715e+06	1.56036e+06	54038114	1.37113e+07	2.35982e+07	Qdpr	25.6	14.5777	1		0	66.48	43	7	16	7	241	7.81	55.69	7	metabolic process;response to stimulus	cytoplasm;cytosol;mitochondrion	catalytic activity;nucleotide binding;protein binding		110391	ENSMUSG00000015806.12	Qdpr; LOC102643271	5	Metabolic pathways; Folate biosynthesis		Phenylalanine and tyrosine catabolism	6
High	P10649	11	Glutathione S-transferase Mu 1 OS=Mus musculus GN=Gstm1 PE=1 SV=2	1.11587e+07	5.12198e+06	1.71615e+08	2.46387e+07	1.55278e+08	Gstm1	26	14.3947	1		0	135.985	60	14	57	11	218	7.94	144.85	14	metabolic process;response to stimulus	cytoplasm;cytosol;extracellular	catalytic activity;metal ion binding;protein binding	Pf00043, Pf02798, Pf13417, Pf14497	14862	ENSMUSG00000058135.12	Gstm1	3	Glutathione metabolism; Platinum drug resistance; Drug metabolism - cytochrome P450; Chemical carcinogenesis; Metabolism of xenobiotics by cytochrome P450	Metapathway biotransformation; Aflatoxin B1 metabolism; Estrogen metabolism		8
High	Q9D819	14	Inorganic pyrophosphatase OS=Mus musculus GN=Ppa1 PE=1 SV=1	5.11175e+06	1.53987e+07	2.05076e+08	9.0398e+07	1.41491e+08	Ppa1	32.6	14.203	1		0	161.018	69	14	65	14	289	5.6	178.86	14	metabolic process	cytoplasm	catalytic activity;metal ion binding	Pf00719	67895	ENSMUSG00000020089.8	Ppa1	10	Oxidative phosphorylation	Hypothetical Network for Drug Addiction	Cytosolic tRNA aminoacylation; Pyrophosphate hydrolysis	8
High	Q9WU28	6	Prefoldin subunit 5 OS=Mus musculus GN=Pfdn5 PE=1 SV=1	1.78066e+06	967432	4.35459e+07	3.33677e+06	1.13396e+07	Pfdn5	17.3	14.1243	1	Met-loss+Acetyl [N-Term]	0	41.21	51	6	10	6	154	6.33	30.3	6	metabolic process;regulation of biological process	cytoplasm;nucleus	protein binding	Pf02996	56612	ENSMUSG00000001289.12	Pfdn5	15				0
High	Q8R550	9	SH3 domain-containing kinase-binding protein 1 OS=Mus musculus GN=Sh3kbp1 PE=1 SV=1	1.10107e+06	719020	2.61959e+07	3.21619e+06	9.14818e+06	Sh3kbp1	78.1	14.124	1		0	50.958	15	9	11	9	709	7.55	21.91	9	cell death;cell organization and biogenesis;cellular component movement;regulation of biological process;transport	cytoplasm;cytoskeleton;membrane	protein binding	Pf00018, Pf07653, Pf14604, Pf14931	58194	ENSMUSG00000040990.17	Sh3kbp1	X	Endocytosis	Kit Receptor Signaling Pathway; EGFR1 Signaling Pathway	Antigen activates B Cell Receptor (BCR) leading to generation of second messengers; EGFR downregulation; Reelin signalling pathway; Cargo recognition for clathrin-mediated endocytosis; Negative regulation of MET activity	20
High	Q05D44	22	Eukaryotic translation initiation factor 5B OS=Mus musculus GN=Eif5b PE=1 SV=2	7.02306e+06	553467	7.18041e+07	3.31616e+07	5.13443e+07	Eif5b	137.5	13.7539	1		0	146.409	27	22	34	22	1216	5.59	95.14	22	metabolic process;regulation of biological process	cytoplasm	catalytic activity;metal ion binding;nucleotide binding;RNA binding	Pf00009, Pf01926, Pf03144, Pf11987, Pf14578	226982	ENSMUSG00000026083.12	Eif5b	1	RNA transport		Cap-dependent Translation Initiation; GTP hydrolysis and joining of the 60S ribosomal subunit	6
High	P62267	6	40S ribosomal protein S23 OS=Mus musculus GN=Rps23 PE=1 SV=3	8.52736e+06	4.18305e+06	172022321	5.20924e+07	3.72582e+07	Rps23	15.8	13.7091	1		0	38.396	49	6	19	6	143	10.49	46.05	6	cell organization and biogenesis;metabolic process	membrane;ribosome	RNA binding;structural molecule activity	Pf00164	66475	ENSMUSG00000049517.7	Rps23	13	Ribosome	Cytoplasmic Ribosomal Proteins; mRNA processing	L13a-mediated translational silencing of Ceruloplasmin expression; Nonsense Mediated Decay (NMD) independent of the Exon Junction Complex (EJC); Nonsense Mediated Decay (NMD) enhanced by the Exon Junction Complex (EJC); Ribosomal scanning and start codon recognition; GTP hydrolysis and joining of the 60S ribosomal subunit; Formation of a pool of free 40S subunits; SRP-dependent cotranslational pr…	19
High	P70677	9	Caspase-3 OS=Mus musculus GN=Casp3 PE=1 SV=1	2.98259e+06	4.30577e+06	5.64113e+07	2.47112e+07	6.81476e+07	Casp3	31.5	13.6537	1		0	69.804	36	9	29	9	277	6.92	78.6	9	cell death;cell differentiation;metabolic process;regulation of biological process;response to stimulus	cytoplasm;cytosol;membrane;nucleus	catalytic activity;enzyme regulator activity;protein binding	Pf00656	12367	ENSMUSG00000031628.9	Casp3	8	AGE-RAGE signaling pathway in diabetic complications; Herpes simplex infection; Platinum drug resistance; p53 signaling pathway; MAPK signaling pathway; MicroRNAs in cancer; Amyotrophic lateral sclerosis (ALS); TNF signaling pathway; Toxoplasmosis; Tuberculosis; Hepatitis B; Huntington's disease; Apoptosis - multiple species; Non-alcoholic fatty liver disease (NAFLD); Pertussis; Proteoglycans in …	Apoptosis; Oxidative Damage; Apoptosis Modulation by HSP70; PluriNetWork; Alzheimers Disease; miRNA regulation of DNA Damage Response; Spinal Cord Injury; TNF-alpha NF-kB Signaling Pathway; Parkinsons Disease Pathway; IL-6 signaling Pathway; Alpha6-Beta4 Integrin Signaling Pathway; MAPK signaling pathway; FAS pathway and Stress induction of HSP regulation; Toll Like Receptor signaling	Activation of caspases through apoptosome-mediated cleavage; Activation of DNA fragmentation factor; Cytochrome c-mediated apoptotic response; Caspase-mediated cleavage of cytoskeletal proteins; Ligand-independent caspase activation via DCC; Signaling by Hippo; NADE modulates death signalling; Signalling by NGF; Apoptotic cleavage of cell adhesion proteins; Other interleukin signaling; Apoptotic …	66
High	Q62188	17	Dihydropyrimidinase-related protein 3 OS=Mus musculus GN=Dpysl3 PE=1 SV=1	8.84682e+06	6.94689e+06	154053950	3.87878e+07	1.27967e+08	Dpysl3	61.9	13.5416	1		0	194.483	63	22	62	17	570	6.49	172.67	22	cell organization and biogenesis;regulation of biological process;response to stimulus	cytoplasm;cytosol	catalytic activity;protein binding	Pf01979, Pf04909, Pf13147, Pf13594	22240	ENSMUSG00000024501.19	Dpysl3	18			CRMPs in Sema3A signaling	4
High	O55131	11	Septin-7 OS=Mus musculus GN=Sept7 PE=1 SV=1	4.75966e+06	8.71108e+06	135257009	7.85466e+07	5.96962e+07	Sept7	50.5	13.5355	1		0	138.189	40	12	35	11	436	8.57	105.03	12	cell differentiation;cell division;cell growth;cell organization and biogenesis;regulation of biological process	chromosome;cytoplasm;cytoskeleton;membrane;nucleus	nucleotide binding;protein binding	Pf00735, Pf01926, Pf05368	235072		Sept7	9				0
High	Q8K1M6	13	Dynamin-1-like protein OS=Mus musculus GN=Dnm1l PE=1 SV=2	1.43969e+06	2.26907e+06	2.55765e+07	2.59122e+07	2.35339e+07	Dnm1l	82.6	13.4857	1		0	54.127	23	13	24	13	742	7.05	47.29	13	cell death;cell organization and biogenesis;regulation of biological process;response to stimulus;transport	cytoplasm;cytoskeleton;cytosol;endoplasmic reticulum;Golgi;membrane;mitochondrion	catalytic activity;nucleotide binding;protein binding	Pf00350, Pf01031, Pf02212	74006		Dnm1l	16	TNF signaling pathway; NOD-like receptor signaling pathway		Apoptotic execution phase	5
High	P16045	9	Galectin-1 OS=Mus musculus GN=Lgals1 PE=1 SV=3	2.32884e+07	1.72099e+08	1868652245	4.86199e+08	1.55088e+09	Lgals1	14.9	13.3264	1	Met-loss+Acetyl [N-Term]	0	230.269	84	9	154	9	135	5.49	410.31	9	cell death;cell differentiation;cellular homeostasis;regulation of biological process;response to stimulus	cell surface;cytoplasm;cytosol;extracellular;nucleus	protein binding;RNA binding;signal transducer activity	Pf00337	16852	ENSMUSG00000068220.5	Lgals1	15			Regulation of Insulin-like Growth Factor (IGF) transport and uptake by Insulin-like Growth Factor Binding Proteins (IGFBPs); Post-translational protein phosphorylation	4
High	O35737	8	Heterogeneous nuclear ribonucleoprotein H OS=Mus musculus GN=Hnrnph1 PE=1 SV=3	3.28573e+06	3.57949e+06	7.34162e+07	2.2628e+07	4.10856e+07	Hnrnph1	49.2	13.3164	1		0	129.779	35	10	41	8	449	6.3	125.81	10	metabolic process;regulation of biological process	cytosol;membrane;nucleus;spliceosomal complex	protein binding;RNA binding	Pf00076, Pf08080, Pf14259	59013	ENSMUSG00000007850.16	Hnrnph1	11		mRNA processing	mRNA Splicing - Major Pathway; FGFR2 alternative splicing	10
High	Q99J77	8	Sialic acid synthase OS=Mus musculus GN=Nans PE=1 SV=1	2.81869e+06	796764	3.68399e+07	2.03786e+07	1.46961e+07	Nans	40	13.2606	1		0	74.076	36	8	15	8	359	7.06	51.63	8	metabolic process	cytoplasm;cytosol	catalytic activity	Pf03102, Pf08666	94181	ENSMUSG00000028334.10	Nans	4	Metabolic pathways; Amino sugar and nucleotide sugar metabolism		Sialic acid metabolism	8
High	Q99JF8	8	PC4 and SFRS1-interacting protein OS=Mus musculus GN=Psip1 PE=1 SV=1	1.20695e+06	889032	24045656	2.16174e+06	1.52726e+07	Psip1	59.7	13.1935	1		0	63.002	24	9	16	8	528	9.13	40.21	9	cell organization and biogenesis;metabolic process;regulation of biological process;response to stimulus	nucleus	DNA binding;protein binding;RNA binding	Pf00855, Pf11467	101739	ENSMUSG00000028484.16	Psip1	4				0
High	P97346	4	Nucleoredoxin OS=Mus musculus GN=Nxn PE=1 SV=1	594118	333788	6.7361e+06	1.74131e+06	9.86362e+06	Nxn	48.3	13.1774	1	Met-loss+Acetyl [N-Term]	0	29.195	17	4	6	4	435	4.93	19.04	4	cell differentiation;cellular homeostasis;development;metabolic process;regulation of biological process;response to stimulus	cytoplasm;cytosol;nucleus	antioxidant activity;catalytic activity;protein binding	Pf00085, Pf00578, Pf13098, Pf13899, Pf13905	18230	ENSMUSG00000020844.6	Nxn	11				0
High	Q3U962	21	Collagen alpha-2(V) chain OS=Mus musculus GN=Col5a2 PE=1 SV=1	3.803e+06	3.27733e+06	1.36977e+07	6.04192e+07	6.54076e+07	Col5a2	144.9	13.1373	1		0	150.538	24	22	34	21	1497	6.7	87.36	22	cell organization and biogenesis;regulation of biological process;response to stimulus	extracellular	metal ion binding;protein binding;structural molecule activity	Pf00093, Pf01391, Pf01410, Pf14828	12832	ENSMUSG00000026042.16	Col5a2	1	Protein digestion and absorption	Focal Adhesion-PI3K-Akt-mTOR-signaling pathway; Focal Adhesion	ECM proteoglycans; Collagen chain trimerization; Integrin cell surface interactions; MET activates PTK2 signaling; NCAM1 interactions; Collagen degradation; Non-integrin membrane-ECM interactions; Signaling by PDGF; Assembly of collagen fibrils and other multimeric structures	23
High	Q61074	9	Protein phosphatase 1G OS=Mus musculus GN=Ppm1g PE=1 SV=3	540563	2.03591e+06	2.07942e+07	1.35214e+07	1.6129e+07	Ppm1g	58.7	13.0526	1		0	58.405	22	9	18	9	542	4.39	26.42	9	metabolic process;regulation of biological process	membrane;nucleus	catalytic activity;metal ion binding;protein binding	Pf00481	14208	ENSMUSG00000029147.10	Ppm1g	5		mRNA processing		1
High	Q8BGB7	6	Enolase-phosphatase E1 OS=Mus musculus GN=Enoph1 PE=1 SV=1	1.42901e+06	864325	19249149	4.51067e+06	2.11354e+07	Enoph1	28.6	13.0509	1		0	45.499	46	6	12	6	257	4.92	36.48	6	metabolic process	cytoplasm;nucleus	catalytic activity;metal ion binding	Pf13419	67870	ENSMUSG00000029326.13	Enoph1	5	Metabolic pathways; Cysteine and methionine metabolism		Methionine salvage pathway	7
High	Q61699	30	Heat shock protein 105 kDa OS=Mus musculus GN=Hsph1 PE=1 SV=2	4.67629e+06	1.16512e+07	9.03785e+07	4.51873e+07	1.83754e+08	Hsph1	96.3	13.0381	1		0	237.36	50	31	60	30	858	5.53	160.47	31	metabolic process;regulation of biological process;response to stimulus	cytoplasm;cytosol;extracellular;nucleus	enzyme regulator activity;nucleotide binding;protein binding	Pf00012	15505	ENSMUSG00000029657.15	Hsph1	5	Protein processing in endoplasmic reticulum			1
High	Q9D8E6	15	60S ribosomal protein L4 OS=Mus musculus GN=Rpl4 PE=1 SV=3	1.56917e+07	5.79896e+06	2.04604e+08	1.92795e+08	2.20088e+07	Rpl4	47.1	13.0106	1		0	144.88	41	15	48	15	419	11	110.79	15	metabolic process;regulation of biological process	cytoplasm;endoplasmic reticulum;membrane;nucleus;ribosome	protein binding;RNA binding;structural molecule activity	Pf00573, Pf14374	67891	ENSMUSG00000032399.8	Rpl4	9	Ribosome	Cytoplasmic Ribosomal Proteins; TNF-alpha NF-kB Signaling Pathway	L13a-mediated translational silencing of Ceruloplasmin expression; Nonsense Mediated Decay (NMD) independent of the Exon Junction Complex (EJC); Nonsense Mediated Decay (NMD) enhanced by the Exon Junction Complex (EJC); GTP hydrolysis and joining of the 60S ribosomal subunit; Formation of a pool of free 40S subunits; Major pathway of rRNA processing in the nucleolus and cytosol; SRP-dependent cot…	18
High	Q61990	9	Poly(rC)-binding protein 2 OS=Mus musculus GN=Pcbp2 PE=1 SV=1	4.69232e+06	1.14111e+07	1.24759e+08	7.31863e+07	1.14666e+08	Pcbp2	38.2	12.9418	1		0	136.261	60	13	48	9	362	6.79	128.19	13	defense response;metabolic process;regulation of biological process;response to stimulus	cytoplasm;cytosol;membrane;nucleus	DNA binding;protein binding;RNA binding	Pf00013, Pf13014	18521	ENSMUSG00000056851.13	Pcbp2	15		mRNA processing	mRNA Splicing - Major Pathway	5
High	P22907	6	Porphobilinogen deaminase OS=Mus musculus GN=Hmbs PE=1 SV=2	646047	459248	8.30581e+06	4.53502e+06	8.58923e+06	Hmbs	39.3	12.9257	1		0	38.849	22	6	10	6	361	6.87	32.19	6	metabolic process	chromosome;cytoplasm;nucleus	catalytic activity	Pf01379, Pf03900	15288	ENSMUSG00000032126.16	Hmbs	9	Metabolic pathways; Porphyrin and chlorophyll metabolism	Heme Biosynthesis	Heme biosynthesis	6
High	Q9CQ65	16	S-methyl-5'-thioadenosine phosphorylase OS=Mus musculus GN=Mtap PE=1 SV=1	1.18283e+07	6.56089e+06	1.16228e+08	2.5685e+07	2.14042e+08	Mtap	31	12.9045	1	Met-loss+Acetyl [N-Term]	0	177.279	78	16	43	16	283	7.14	128.83	16	metabolic process;response to stimulus	cytoplasm;cytosol;nucleus	catalytic activity	Pf01048	66902	ENSMUSG00000062937.7	Mtap	4	Metabolic pathways; Cysteine and methionine metabolism		Methionine salvage pathway	7
High	Q8K1J6	7	CCA tRNA nucleotidyltransferase 1, mitochondrial OS=Mus musculus GN=Trnt1 PE=1 SV=1	1.58753e+06	914638	2.34082e+07	5.95457e+06	1.90009e+07	Trnt1	49.9	12.8858	1		0	28.756	19	7	12	7	434	8.56	28.76	7	cell organization and biogenesis;metabolic process	mitochondrion	catalytic activity;nucleotide binding;RNA binding	Pf01743, Pf12627	70047	ENSMUSG00000013736.16	Trnt1	6	RNA transport			1
High	P62911	4	60S ribosomal protein L32 OS=Mus musculus GN=Rpl32 PE=1 SV=2	1.13193e+06	1.44833e+06	34350262	1.36464e+07	1.83042e+06	Rpl32	15.9	12.8739	1		0	22.905	28	4	6	4	135	11.33	13.37	4	metabolic process;response to stimulus	membrane;ribosome	RNA binding;structural molecule activity	Pf01655	19951; 652989	ENSMUSG00000057841.5	Rpl32; Rpl32p	6; X	Ribosome	Cytoplasmic Ribosomal Proteins; mRNA processing	L13a-mediated translational silencing of Ceruloplasmin expression; Nonsense Mediated Decay (NMD) independent of the Exon Junction Complex (EJC); Nonsense Mediated Decay (NMD) enhanced by the Exon Junction Complex (EJC); GTP hydrolysis and joining of the 60S ribosomal subunit; Formation of a pool of free 40S subunits; Major pathway of rRNA processing in the nucleolus and cytosol; SRP-dependent cot…	18
High	Q9D0W5	5	Peptidyl-prolyl cis-trans isomerase-like 1 OS=Mus musculus GN=Ppil1 PE=1 SV=1	727503	454990	1.29118e+07	2.92187e+06	6.89467e+06	Ppil1	18.2	12.8138	1		0	31.793	48	5	9	5	166	7.99	21.79	5	metabolic process	spliceosomal complex	catalytic activity	Pf00160	68816	ENSMUSG00000024007.14	Ppil1	17	Spliceosome		mRNA Splicing - Major Pathway	5
High	Q810A7	14	ATP-dependent RNA helicase DDX42 OS=Mus musculus GN=Ddx42 PE=1 SV=3	2.90001e+06	945670	3.23965e+07	2.02843e+07	2.11537e+07	Ddx42	101.9	12.7995	1		0	81.418	22	14	25	14	929	6.98	57.98	14	metabolic process;regulation of biological process	cytoplasm;cytosol;membrane;nucleus	catalytic activity;nucleotide binding;RNA binding	Pf00270, Pf00271, Pf13307	72047	ENSMUSG00000020705.6	Ddx42	11	Spliceosome		mRNA Splicing - Major Pathway; mRNA Splicing - Minor Pathway	6
High	P47963	5	60S ribosomal protein L13 OS=Mus musculus GN=Rpl13 PE=1 SV=3	4.72636e+06	2.06469e+06	5.88716e+07	6.8023e+07	2.9631e+06	Rpl13	24.3	12.7479	1		0	17.986	20	5	14	5	211	11.55	21.82	5	metabolic process	membrane;nucleus;ribosome	RNA binding;structural molecule activity	Pf01294	270106	ENSMUSG00000000740.12	Rpl13	8	Ribosome	Cytoplasmic Ribosomal Proteins	L13a-mediated translational silencing of Ceruloplasmin expression; Nonsense Mediated Decay (NMD) independent of the Exon Junction Complex (EJC); Nonsense Mediated Decay (NMD) enhanced by the Exon Junction Complex (EJC); GTP hydrolysis and joining of the 60S ribosomal subunit; Formation of a pool of free 40S subunits; Major pathway of rRNA processing in the nucleolus and cytosol; SRP-dependent cot…	17
High	Q5FWK3	10	Rho GTPase-activating protein 1 OS=Mus musculus GN=Arhgap1 PE=1 SV=1	2.26692e+06	3.21343e+06	2.15581e+07	3.63657e+07	4.66144e+07	Arhgap1	50.4	12.7167	1		0	76.484	31	10	28	10	439	6.44	74.95	10	regulation of biological process;response to stimulus;transport	cytoplasm;endosome;membrane	enzyme regulator activity;protein binding	Pf00620, Pf00650, Pf13716	228359	ENSMUSG00000027247.16	Arhgap1	2			Rho GTPase cycle	3
High	Q8CH18	4	Cell division cycle and apoptosis regulator protein 1 OS=Mus musculus GN=Ccar1 PE=1 SV=1	228608	214869	4.92909e+06	189583	3.28033e+06	Ccar1	132	12.626	1		0	18.645	4	4	4	4	1146	5.76	10.69	4	cell death;metabolic process;regulation of biological process	cytoplasm	DNA binding;protein binding;RNA binding	Pf02037, Pf14443, Pf14444	67500	ENSMUSG00000020074.7	Ccar1	10			mRNA Splicing - Major Pathway	4
High	P57776	14	Elongation factor 1-delta OS=Mus musculus GN=Eef1d PE=1 SV=3	3.05856e+07	1.0853e+07	3.26219e+08	2.58701e+08	1.9892e+08	Eef1d	31.3	12.6105	1	Met-loss+Acetyl [N-Term]	0	114.115	72	15	59	14	281	5.02	160.72	15	metabolic process;regulation of biological process;response to stimulus	cytoplasm;cytosol;endoplasmic reticulum;nucleus	DNA binding;protein binding;RNA binding;signal transducer activity	Pf00736	66656		Eef1d	15	Herpes simplex infection	Translation Factors		2
High	P27546	18	Microtubule-associated protein 4 OS=Mus musculus GN=Map4 PE=1 SV=3	3.64824e+06	446960	4.25564e+07	1.79096e+07	1.67832e+07	Map4	117.4	12.5755	1		0	158.79	26	18	25	18	1125	4.98	65.49	18	cell division;cell organization and biogenesis;cellular component movement;regulation of biological process	cytoplasm;cytoskeleton	protein binding;RNA binding	Pf00418	17758	ENSMUSG00000032479.15	Map4; Mtap4	9				0
High	O08749	3	Dihydrolipoyl dehydrogenase, mitochondrial OS=Mus musculus GN=Dld PE=1 SV=2	479035	415424	1.13958e+07	1.56205e+06	3.89556e+06	Dld	54.2	12.5614	1		0	13.616	8	3	3	3	509	7.9	2.44	3	cellular homeostasis;metabolic process;regulation of biological process	mitochondrion;organelle lumen	catalytic activity;nucleotide binding	Pf00070, Pf00890, Pf01134, Pf01946, Pf02852, Pf03486, Pf07992, Pf12831, Pf13450	13382	ENSMUSG00000020664.10	Dld	12	Pyruvate metabolism; Citrate cycle (TCA cycle); Valine, leucine and isoleucine degradation; Metabolic pathways; Glycine, serine and threonine metabolism; Glycolysis / Gluconeogenesis; Propanoate metabolism; Carbon metabolism; Glyoxylate and dicarboxylate metabolism	Fatty Acid Beta Oxidation; Glycolysis and Gluconeogenesis; TCA Cycle	Glycine degradation; Signaling by Retinoic Acid; Citric acid cycle (TCA cycle); Lysine catabolism; Regulation of pyruvate dehydrogenase (PDH) complex; Branched-chain amino acid catabolism	27
High	Q8VIJ6	19	Splicing factor, proline- and glutamine-rich OS=Mus musculus GN=Sfpq PE=1 SV=1	1.79114e+07	5.12536e+06	1.7452e+08	7.70449e+07	1.79605e+08	Sfpq	75.4	12.4777	1		0	139.469	34	20	53	19	699	9.44	138.24	20	cell organization and biogenesis;defense response;metabolic process;regulation of biological process;response to stimulus	chromosome;cytoplasm;nucleus	DNA binding;protein binding;RNA binding	Pf00076, Pf08075, Pf13893, Pf14259	71514	ENSMUSG00000028820.13	Sfpq	4		mRNA processing	PTK6 Regulates Proteins Involved in RNA Processing	5
High	Q62356	13	Follistatin-related protein 1 OS=Mus musculus GN=Fstl1 PE=1 SV=2	2.62503e+07	2.02417e+07	3.54899e+08	3.93689e+08	1.20276e+08	Fstl1	34.5	12.459	1		0	240.35	55	13	98	13	306	5.85	287.83	13	response to stimulus;transport	extracellular;membrane	metal ion binding;protein binding;transporter activity	Pf00050, Pf03137, Pf07648, Pf09289, Pf13499	14314	ENSMUSG00000022816.11	Fstl1	16			Regulation of Insulin-like Growth Factor (IGF) transport and uptake by Insulin-like Growth Factor Binding Proteins (IGFBPs); Signaling by BMP; Post-translational protein phosphorylation	7
High	P51859	10	Hepatoma-derived growth factor OS=Mus musculus GN=Hdgf PE=1 SV=2	1.70909e+07	8.58855e+06	2.01361e+08	1.01033e+08	1.76868e+08	Hdgf	26.3	12.4422	1		0	130.718	52	11	61	10	237	4.83	171.9	11	metabolic process;regulation of biological process	cytoplasm;extracellular;nucleus	DNA binding;nucleotide binding;protein binding;RNA binding	Pf00855	15191	ENSMUSG00000004897.16	Hdgf	3				0
High	Q99K48	10	Non-POU domain-containing octamer-binding protein OS=Mus musculus GN=Nono PE=1 SV=3	6.79726e+06	2.11414e+06	6.08071e+07	5.14348e+07	5.30887e+07	Nono	54.5	12.3685	1		0	84.958	23	12	40	10	473	8.95	93.41	12	defense response;metabolic process;regulation of biological process;response to stimulus	membrane;nucleus	DNA binding;protein binding;RNA binding	Pf00076, Pf08075, Pf13893, Pf14259	53610	ENSMUSG00000031311.17	Nono	X		mRNA processing		1
High	Q99KC8	21	von Willebrand factor A domain-containing protein 5A OS=Mus musculus GN=Vwa5a PE=1 SV=2	2.23962e+06	1.27295e+06	3.95249e+07	9.56185e+06	1.5921e+07	Vwa5a	87.1	12.3381	1		0	133.868	42	21	25	21	793	6.58	63.05	21				Pf00092, Pf08487, Pf13519, Pf13757, Pf13768	67776	ENSMUSG00000023186.14	Vwa5a	9				0
High	Q0GNC1	13	Inverted formin-2 OS=Mus musculus GN=Inf2 PE=1 SV=1	3.48413e+06	1.0864e+06	3.05868e+07	1.87445e+07	3.39839e+07	Inf2	138.5	12.1525	1		0	98.886	15	13	21	13	1273	5.21	59.18	13	cell organization and biogenesis;regulation of biological process	cytoplasm	protein binding	Pf02181, Pf02205, Pf06367, Pf06371	70435		Inf2	12				0
High	Q91VR5	13	ATP-dependent RNA helicase DDX1 OS=Mus musculus GN=Ddx1 PE=1 SV=1	2.13621e+06	2.03461e+06	2.95956e+07	2.32e+07	2.31401e+07	Ddx1	82.4	12.1376	1		0	80.894	24	13	29	13	740	7.21	82.84	13	development;metabolic process;regulation of biological process;response to stimulus	cytoplasm;cytosol;membrane;nucleus	catalytic activity;DNA binding;nucleotide binding;protein binding;RNA binding	Pf00270, Pf00271, Pf00622	104721	ENSMUSG00000037149.9	Ddx1	12		mRNA processing		1
High	Q8BWY3	17	Eukaryotic peptide chain release factor subunit 1 OS=Mus musculus GN=Etf1 PE=1 SV=4	1.16936e+07	6.5052e+06	1.04216e+08	1.06404e+08	1.20213e+08	Etf1	49	12.1192	1	Met-loss+Acetyl [N-Term]	0	121.863	52	17	50	17	437	5.71	115.12	17	cell organization and biogenesis;metabolic process	cytoplasm	RNA binding	Pf03463, Pf03464, Pf03465	225363	ENSMUSG00000024360.7	Etf1	18	mRNA surveillance pathway	Translation Factors	Nonsense Mediated Decay (NMD) independent of the Exon Junction Complex (EJC); Nonsense Mediated Decay (NMD) enhanced by the Exon Junction Complex (EJC); Eukaryotic Translation Termination	9
High	P63158	12	High mobility group protein B1 OS=Mus musculus GN=Hmgb1 PE=1 SV=2	8.29463e+07	1.76046e+07	8.21382e+08	3.14532e+08	6.80054e+08	Hmgb1	24.9	12.0401	1		0	210.311	45	14	91	12	215	5.74	245.56	14	cell differentiation;cell organization and biogenesis;cell proliferation;cellular component movement;cellular homeostasis;defense response;metabolic process;regulation of biological process;response to stimulus;transport	cell surface;chromosome;cytoplasm;endosome;extracellular;membrane;nucleus	catalytic activity;DNA binding;enzyme regulator activity;protein binding;RNA binding	Pf00505, Pf09011	15289; 100862258	ENSMUSG00000066551.12	Hmgb1; Gm21596; LOC100862258	5; 2	Base excision repair		DEx/H-box helicases activate type I IFN and inflammatory cytokines production ; Activation of DNA fragmentation factor; Activated TLR4 signalling; TAK1 activates NFkB by phosphorylation and activation of IKKs complex; RIP-mediated NFkB activation via ZBP1; Neutrophil degranulation; TRAF6 mediated NF-kB activation; Advanced glycosylation endproduct receptor signaling; Interleukin-1 family signalin…	38
High	Q9CX34	9	Protein SGT1 homolog OS=Mus musculus GN=Sugt1 PE=1 SV=3	1.31451e+06	3.13742e+06	1.95319e+07	3.87785e+06	5.68286e+07	Sugt1	38.1	12.0155	1	Met-loss+Acetyl [N-Term]	0	55.477	34	9	17	9	336	5.45	43.42	9	regulation of biological process	cytoplasm;nucleus	protein binding	Pf00515, Pf04969, Pf05002, Pf07719, Pf12895, Pf13414, Pf13424, Pf13428, Pf13431, Pf13432, Pf14559	67955	ENSMUSG00000022024.9	Sugt1	14	NOD-like receptor signaling pathway		The NLRP3 inflammasome	6
High	Q3THE2	4	Myosin regulatory light chain 12B OS=Mus musculus GN=Myl12b PE=1 SV=2	2.55764e+06	6.82198e+06	106513544	1.26723e+07	4.96549e+07	Myl12b	19.8	12.0005	1		0	73.278	48	9	32	4	172	4.84	82.12	9	regulation of biological process		metal ion binding;protein binding	Pf00036, Pf13202, Pf13405, Pf13833	67938	ENSMUSG00000034868.8	Myl12b	17	Leukocyte transendothelial migration; Regulation of actin cytoskeleton; Focal adhesion; Platelet activation; Tight junction		RHO GTPases activate PAKs; Smooth Muscle Contraction	11
High	P97855	11	Ras GTPase-activating protein-binding protein 1 OS=Mus musculus GN=G3bp1 PE=1 SV=1	1.67735e+07	4.46321e+06	1.58653e+08	7.62776e+07	1.46721e+08	G3bp1	51.8	11.9809	1		0	113.201	35	11	47	11	465	5.59	126.06	11	metabolic process;regulation of biological process;transport	cytoplasm;cytosol;membrane;nucleus	catalytic activity;DNA binding;nucleotide binding;protein binding;RNA binding	Pf00076, Pf02136, Pf13893, Pf14259	27041	ENSMUSG00000018583.5	G3bp1	11		mRNA processing		1
High	Q9CQ60	13	6-phosphogluconolactonase OS=Mus musculus GN=Pgls PE=1 SV=1	8.83783e+06	4.8661e+06	1.50448e+08	1.99802e+07	7.55671e+07	Pgls	27.2	11.9671	1	Met-loss+Acetyl [N-Term]	0	165.501	86	13	44	13	257	5.85	149.05	13	metabolic process	cytoplasm	catalytic activity	Pf01182	66171	ENSMUSG00000031807.10	Pgls	8	Metabolic pathways; Pentose phosphate pathway; Carbon metabolism	Pentose Phosphate Pathway	Pentose phosphate pathway (hexose monophosphate shunt)	7
High	Q7TMK9	19	Heterogeneous nuclear ribonucleoprotein Q OS=Mus musculus GN=Syncrip PE=1 SV=2	3.29639e+07	2.74268e+07	6.72494e+08	1.98274e+08	2.11881e+08	Syncrip	69.6	11.9516	1		0	164.841	40	19	61	19	623	8.59	144.62	19	cell differentiation;metabolic process;regulation of biological process;response to stimulus	cytoplasm;endoplasmic reticulum;membrane;nucleus;spliceosomal complex	RNA binding	Pf00076, Pf13893, Pf14259	56403	ENSMUSG00000032423.12	Syncrip	9		mRNA processing		1
High	P25444	13	40S ribosomal protein S2 OS=Mus musculus GN=Rps2 PE=1 SV=3	3.6868e+07	1.21602e+07	4.95201e+08	3.24453e+08	5.69278e+07	Rps2	31.2	11.9194	1		0	112.791	49	13	58	13	293	10.24	145.78	13	cell organization and biogenesis;metabolic process;regulation of biological process;response to stimulus	membrane;nucleus;ribosome	protein binding;RNA binding;structural molecule activity	Pf00333, Pf03719	16898; 546298	ENSMUSG00000044533.15	Rps2; Rps2-ps13	17; X	Ribosome	Cytoplasmic Ribosomal Proteins		2
High	Q60972	12	Histone-binding protein RBBP4 OS=Mus musculus GN=Rbbp4 PE=1 SV=5	1.07115e+07	5.29418e+06	1.07561e+08	6.15318e+07	1.16793e+08	Rbbp4	47.6	11.9077	1		0	239.294	68	18	79	12	425	4.89	228.49	18	cell organization and biogenesis;metabolic process;regulation of biological process;response to stimulus	cytosol;nucleus	catalytic activity;DNA binding;protein binding	Pf00400, Pf12265	19646	ENSMUSG00000057236.10	Rbbp4	4		PluriNetWork	Oxidative Stress Induced Senescence; Deposition of new CENPA-containing nucleosomes at the centromere; RNA Polymerase I Transcription Initiation; PRC2 methylates histones and DNA; G0 and Early G1; NoRC negatively regulates rRNA expression; Regulation of PTEN gene transcription; Regulation of TP53 Activity through Acetylation; PKMTs methylate histone lysines; Mus musculus biological processes; Tra…	34
High	Q9CQT1	13	Methylthioribose-1-phosphate isomerase OS=Mus musculus GN=Mri1 PE=1 SV=1	3.44932e+06	1.53975e+06	5.54313e+07	1.09051e+07	2.27205e+07	Mri1	39.4	11.9003	1		0	96.024	61	13	24	13	369	5.91	82.54	13	metabolic process	cytoplasm;cytosol;nucleus	catalytic activity;protein binding	Pf01008	67873	ENSMUSG00000004996.9	Mri1	8	Metabolic pathways; Cysteine and methionine metabolism		Methionine salvage pathway	7
High	Q61937	11	Nucleophosmin OS=Mus musculus GN=Npm1 PE=1 SV=1	1.7437e+08	1.13591e+08	2.20408e+09	1.57495e+09	1.35719e+09	Npm1	32.5	11.891	1		0	244.165	50	11	146	11	292	4.77	400.64	11	cell growth;cell organization and biogenesis;cellular homeostasis;metabolic process;regulation of biological process;response to stimulus;transport	cytoplasm;cytoskeleton;cytosol;membrane;nucleus	DNA binding;enzyme regulator activity;nucleotide binding;protein binding;RNA binding	Pf03066	18148	ENSMUSG00000057113.13	Npm1	11		mRNA processing		1
High	P45377	10	Aldose reductase-related protein 2 OS=Mus musculus GN=Akr1b8 PE=1 SV=2	5.55328e+06	5.84925e+06	93288240	2.00772e+07	8.96902e+07	Akr1b8	36.1	11.872	1	Met-loss+Acetyl [N-Term]	0	124.91	51	10	35	10	316	6.37	98.04	10	metabolic process	cytoplasm	catalytic activity	Pf00248	14187	ENSMUSG00000029762.6	Akr1b8	6	Metabolic pathways; Glycerolipid metabolism; Fructose and mannose metabolism; Pentose and glucuronate interconversions; Galactose metabolism		Estrogen biosynthesis; Signaling by GPCR; Retinoid metabolism and transport	16
High	P19253	6	60S ribosomal protein L13a OS=Mus musculus GN=Rpl13a PE=1 SV=4	1.62432e+06	5.70918e+06	6.43602e+07	6.53926e+07	708828	Rpl13a	23.4	11.8599	1	Met-loss+Acetyl [N-Term]	0	36.368	31	6	19	6	203	11.02	34.28	6	cellular component movement;metabolic process;regulation of biological process;response to stimulus	cytoplasm;membrane;nucleus;ribosome	RNA binding;structural molecule activity	Pf00572	22121	ENSMUSG00000074129.13	Rpl13a	7	Ribosome	Cytoplasmic Ribosomal Proteins	L13a-mediated translational silencing of Ceruloplasmin expression; Nonsense Mediated Decay (NMD) independent of the Exon Junction Complex (EJC); Nonsense Mediated Decay (NMD) enhanced by the Exon Junction Complex (EJC); GTP hydrolysis and joining of the 60S ribosomal subunit; Formation of a pool of free 40S subunits; Major pathway of rRNA processing in the nucleolus and cytosol; SRP-dependent cot…	17
High	Q9D8Y0	4	EF-hand domain-containing protein D2 OS=Mus musculus GN=Efhd2 PE=1 SV=1	456756	508132	7.26252e+06	2.53933e+06	7.2733e+06	Efhd2	26.8	11.7977	1		0	14.681	16	4	7	4	240	5.06	9.96	4		membrane	metal ion binding;protein binding		27984		Efhd2	4				0
High	Q8BKC5	49	Importin-5 OS=Mus musculus GN=Ipo5 PE=1 SV=3	3.24162e+07	3.6653e+07	3.75956e+08	2.40212e+08	6.05452e+08	Ipo5	123.5	11.7913	1	Met-loss+Acetyl [N-Term]	0	579.544	74	50	175	49	1097	4.93	539.03	50	regulation of biological process;response to stimulus;transport	cytoplasm;membrane;nucleus	protein binding;RNA binding;transporter activity	Pf02985, Pf12755, Pf13513, Pf13646	70572	ENSMUSG00000030662.9	Ipo5	14				0
High	O55142	4	60S ribosomal protein L35a OS=Mus musculus GN=Rpl35a PE=1 SV=2	2.26876e+06	973594	30669719	2.27667e+07	3.86318e+06	Rpl35a	12.5	11.7815	1		0	8.141	32	4	5	4	110	10.89	5.23	4	metabolic process	membrane;mitochondrion;ribosome	RNA binding;structural molecule activity	Pf01247	100043423; 57808; 100042363; 100302576; 100040169; 100046034; 100048620	ENSMUSG00000060636.13	Rpl35a-ps4; Rpl35a; Rpl35a-ps2; Gm10243; Rpl35a-ps5; LOC100862595; Gm14279; LOC100048620	2; 16; 1; 6; 5	Ribosome	Cytoplasmic Ribosomal Proteins	L13a-mediated translational silencing of Ceruloplasmin expression; Nonsense Mediated Decay (NMD) independent of the Exon Junction Complex (EJC); Nonsense Mediated Decay (NMD) enhanced by the Exon Junction Complex (EJC); GTP hydrolysis and joining of the 60S ribosomal subunit; Formation of a pool of free 40S subunits; Major pathway of rRNA processing in the nucleolus and cytosol; SRP-dependent cot…	17
High	O88844	17	Isocitrate dehydrogenase [NADP] cytoplasmic OS=Mus musculus GN=Idh1 PE=1 SV=2	1.36216e+07	9.70218e+06	2.97099e+08	4.92582e+07	6.42042e+07	Idh1	46.6	11.7351	1		0	157.001	56	18	68	17	414	7.17	160.67	18	metabolic process;regulation of biological process;response to stimulus	cytoplasm;cytosol;mitochondrion	catalytic activity;metal ion binding;nucleotide binding;protein binding	Pf00180, Pf01960	15926	ENSMUSG00000025950.16	Idh1	1	Glutathione metabolism; Citrate cycle (TCA cycle); Metabolic pathways; Biosynthesis of amino acids; 2-Oxocarboxylic acid metabolism; Carbon metabolism; Peroxisome	Glutathione metabolism; Glutathione and one carbon metabolism	Neutrophil degranulation; NADPH regeneration	16
High	P97494	11	Glutamate--cysteine ligase catalytic subunit OS=Mus musculus GN=Gclc PE=1 SV=4	1.50398e+06	544116	2.42274e+07	2.12236e+06	9.6851e+06	Gclc	72.5	11.7296	1		0	96.306	29	11	15	11	637	5.9	51.62	11	cell organization and biogenesis;cellular homeostasis;metabolic process;regulation of biological process;response to stimulus	cytosol	catalytic activity;metal ion binding;nucleotide binding;protein binding	Pf03074	14629	ENSMUSG00000032350.9	Gclc	9	Glutathione metabolism; Metabolic pathways; Cysteine and methionine metabolism	Keap1-Nrf2; Glutathione metabolism; One carbon metabolism and related pathways; Oxidative Stress; Glutathione and one carbon metabolism	Glutathione synthesis and recycling	13
High	P34022	5	Ran-specific GTPase-activating protein OS=Mus musculus GN=Ranbp1 PE=1 SV=2	1.0125e+07	4.15196e+06	1.13523e+08	4.74374e+07	8.99319e+07	Ranbp1	23.6	11.7155	1		0	146.252	47	5	35	5	203	5.22	126.5	5	cell organization and biogenesis;metabolic process;regulation of biological process;response to stimulus;transport	cytoplasm;cytosol;nucleus	enzyme regulator activity;protein binding	Pf00638	19385	ENSMUSG00000005732.14; ENSMUSG00000099164.8	Ranbp1	16; CHR_MG3833_MG4220_PATCH	HTLV-I infection; Viral carcinogenesis			2
High	Q9QZE5	19	Coatomer subunit gamma-1 OS=Mus musculus GN=Copg1 PE=1 SV=1	4.93524e+06	4.86175e+06	6.75335e+07	3.97942e+07	6.44876e+07	Copg1	97.5	11.6917	1		0	161.137	37	21	46	19	874	5.35	116.89	21	cellular component movement;transport	cytoplasm;cytosol;Golgi;membrane	structural molecule activity	Pf01602, Pf08752	54161	ENSMUSG00000030058.17	Copg; Copg1	6			COPI-mediated anterograde transport; COPI-dependent Golgi-to-ER retrograde traffic	11
High	Q9CR16	14	Peptidyl-prolyl cis-trans isomerase D OS=Mus musculus GN=Ppid PE=1 SV=3	2.44197e+07	6.46909e+06	2.36398e+08	1.01177e+08	2.01818e+08	Ppid	40.7	11.6416	1		0	193.386	52	14	83	14	370	7.43	214.25	14	cell death;cell organization and biogenesis;metabolic process;regulation of biological process;response to stimulus;transport	cytoplasm;cytosol;mitochondrion;nucleus	catalytic activity;protein binding	Pf00160, Pf00515, Pf07719, Pf13414, Pf13424, Pf13432, Pf14559	67738	ENSMUSG00000027804.13	Ppid	3				0
High	Q8R081	19	Heterogeneous nuclear ribonucleoprotein L OS=Mus musculus GN=Hnrnpl PE=1 SV=2	1.47553e+07	9.10902e+06	1.71568e+08	9.18533e+07	1.52745e+08	Hnrnpl	63.9	11.6259	1		0	298.589	61	19	79	19	586	8.1	279.06	19	cell communication;metabolic process;regulation of biological process;response to stimulus	cytoplasm;cytosol;membrane;nucleus	DNA binding;protein binding;RNA binding	Pf00076, Pf13893, Pf14259	15388	ENSMUSG00000015165.16	Hnrnpl	7		mRNA processing	mRNA Splicing - Major Pathway	5
High	Q9CRT8	5	Exportin-T OS=Mus musculus GN=Xpot PE=1 SV=3	765235	514801	1.32399e+07	674260	8.3422e+06	Xpot	109.7	11.5915	1		0	25.251	7	5	9	5	963	5.25	14.04	5	transport	cytoplasm;cytosol;nucleus	protein binding;RNA binding	Pf08389	73192	ENSMUSG00000034667.8	Xpot	10				0
High	Q9D0I9	30	Arginine--tRNA ligase, cytoplasmic OS=Mus musculus GN=Rars PE=1 SV=2	2.05065e+07	1.81211e+07	2.61185e+08	1.9196e+08	2.1241e+08	Rars	75.6	11.4867	1		0	258.069	55	30	101	30	660	7.55	237.58	30	metabolic process	cytoplasm;cytosol;membrane;mitochondrion;nucleus	catalytic activity;nucleotide binding;protein binding;RNA binding	Pf00750, Pf03485, Pf05746	104458	ENSMUSG00000018848.4	Rars	11	Aminoacyl-tRNA biosynthesis			1
High	Q9WTP6	10	Adenylate kinase 2, mitochondrial OS=Mus musculus GN=Ak2 PE=1 SV=5	1.06496e+07	1.4263e+06	7.25752e+07	3.04217e+07	1.04211e+08	Ak2	26.5	11.4392	1		0	84.25	51	10	40	10	239	7.39	118.04	10	metabolic process	cytoplasm;cytosol;membrane;mitochondrion;nucleus	catalytic activity;nucleotide binding	Pf00406, Pf05191	11637	ENSMUSG00000028792.14	Ak2	4	Thiamine metabolism; Metabolic pathways; Purine metabolism	Purine metabolism	Interconversion of nucleotide di- and triphosphates	7
High	P63028	10	Translationally-controlled tumor protein OS=Mus musculus GN=Tpt1 PE=1 SV=1	1.0295e+07	4.00802e+07	5.10506e+08	6.07371e+07	2.91896e+08	Tpt1	19.5	11.4228	1		0	156.069	85	10	70	10	172	4.86	245.68	10	cell differentiation;regulation of biological process	cytoplasm;cytosol;endosome;nucleus	metal ion binding;protein binding;RNA binding	Pf00838	22070	ENSMUSG00000060126.14	Tpt1	14				0
High	P35979	6	60S ribosomal protein L12 OS=Mus musculus GN=Rpl12 PE=1 SV=2	1.90815e+07	2.07059e+06	1.575e+08	8.20374e+07	1.17496e+08	Rpl12	17.8	11.2529	1		0	70.333	55	6	35	6	165	9.42	126.24	6	cell organization and biogenesis;metabolic process	cytoplasm;membrane;nucleus;ribosome	protein binding;RNA binding;structural molecule activity	Pf00298, Pf03946	269261	ENSMUSG00000038900.17	Rpl12	2	Ribosome	Cytoplasmic Ribosomal Proteins; mRNA processing	L13a-mediated translational silencing of Ceruloplasmin expression; Nonsense Mediated Decay (NMD) independent of the Exon Junction Complex (EJC); Nonsense Mediated Decay (NMD) enhanced by the Exon Junction Complex (EJC); GTP hydrolysis and joining of the 60S ribosomal subunit; Formation of a pool of free 40S subunits; Major pathway of rRNA processing in the nucleolus and cytosol; SRP-dependent cot…	18
High	P40124	22	Adenylyl cyclase-associated protein 1 OS=Mus musculus GN=Cap1 PE=1 SV=4	2.49371e+07	2.91422e+07	3.52662e+08	2.28564e+08	3.30249e+08	Cap1	51.5	11.2363	1	Met-loss+Acetyl [N-Term]	0	298.475	55	22	103	22	474	7.52	299.54	22	cell organization and biogenesis;cellular component movement;regulation of biological process;response to stimulus;transport	cytoplasm;cytoskeleton;cytosol;extracellular;membrane	protein binding	Pf01213, Pf07986, Pf08603	12331	ENSMUSG00000028656.14	Cap1	4		Insulin Signaling	Neutrophil degranulation	4
High	Q9Z1R2	5	Large proline-rich protein BAG6 OS=Mus musculus GN=Bag6 PE=1 SV=1	1.16826e+06	893016	9.87672e+06	6.6259e+06	1.81852e+07	Bag6	121	11.2189	1		0	38.387	9	5	9	5	1154	5.71	29.87	5	cell death;cell differentiation;cell organization and biogenesis;metabolic process;regulation of biological process;response to stimulus;transport	cytoplasm;cytosol;extracellular;membrane;nucleus	protein binding	Pf00240, Pf11976, Pf12057	224727	ENSMUSG00000024392.17	Bag6	17				0
High	Q62348	11	Translin OS=Mus musculus GN=Tsn PE=1 SV=1	6.95488e+06	1.94804e+06	7.9546e+07	3.17051e+07	3.82924e+07	Tsn	26.2	11.1981	1	Met-loss+Acetyl [N-Term]	0	135.827	66	11	44	11	228	6.44	142.48	11	metabolic process	cytoplasm;nucleus	catalytic activity;DNA binding;protein binding;RNA binding	Pf01997	22099	ENSMUSG00000026374.14	Tsn	1		mRNA processing	Small interfering RNA (siRNA) biogenesis	4
High	P53810	8	Phosphatidylinositol transfer protein alpha isoform OS=Mus musculus GN=Pitpna PE=1 SV=2	1.41498e+06	3.15582e+06	3.98137e+07	6.46382e+06	3.04219e+07	Pitpna	31.9	11.1869	1		0	52.538	39	8	15	8	271	6.37	38.06	8	cell organization and biogenesis;transport	cytoplasm;cytosol	transporter activity	Pf02121	18738	ENSMUSG00000017781.17	Pitpna	11		EGFR1 Signaling Pathway		1
High	P63323	6	40S ribosomal protein S12 OS=Mus musculus GN=Rps12 PE=1 SV=2	1.35208e+07	6.1663e+06	1.3974e+08	8.3684e+07	1.06465e+08	Rps12	14.5	11.1711	1	Met-loss+Acetyl [N-Term]	0	63.642	59	6	42	6	132	7.24	103.88	6	metabolic process	cytoplasm;cytosol;membrane;ribosome	RNA binding;structural molecule activity	Pf01248	20042		Rps12	10		Cytoplasmic Ribosomal Proteins		1
High	Q05CL8	2	La-related protein 7 OS=Mus musculus GN=Larp7 PE=1 SV=2	653774	367467	7.18152e+06	3.54242e+06	6.35852e+06	Larp7	64.8	11.1514	1		0	26.632	7	2	6	2	570	9.54	22.08	2	cell proliferation;metabolic process;regulation of biological process	cytosol;nucleus	RNA binding	Pf00076, Pf05383, Pf08777, Pf13893, Pf14259	28036	ENSMUSG00000027968.11	Larp7	3				0
High	P62301	4	40S ribosomal protein S13 OS=Mus musculus GN=Rps13 PE=1 SV=2	1.0807e+07	1.82683e+06	142434211	4.64129e+07	2.23234e+07	Rps13	17.2	11.1431	1		0	33.285	25	4	23	4	151	10.54	48.45	4	metabolic process;regulation of biological process	membrane;nucleus;ribosome	RNA binding;structural molecule activity	Pf00312, Pf08069	68052; 625298; 102642137	ENSMUSG00000090862.3	Rps13; Rps13-ps1; LOC102642137	7; 8	Ribosome	Cytoplasmic Ribosomal Proteins; TNF-alpha NF-kB Signaling Pathway; mRNA processing	L13a-mediated translational silencing of Ceruloplasmin expression; Nonsense Mediated Decay (NMD) independent of the Exon Junction Complex (EJC); Nonsense Mediated Decay (NMD) enhanced by the Exon Junction Complex (EJC); Ribosomal scanning and start codon recognition; GTP hydrolysis and joining of the 60S ribosomal subunit; Formation of a pool of free 40S subunits; SRP-dependent cotranslational pr…	20
High	Q60847	60	Collagen alpha-1(XII) chain OS=Mus musculus GN=Col12a1 PE=2 SV=3	9.27051e+06	8.82242e+06	4.98748e+07	2.45184e+08	6.55387e+06	Col12a1	340	11.1135	1		0	383.341	28	60	98	60	3120	5.64	236.27	60	cell differentiation	extracellular	protein binding	Pf00041, Pf00092, Pf13519	12816		Col12a1	9	Protein digestion and absorption		Collagen chain trimerization; Collagen degradation; Assembly of collagen fibrils and other multimeric structures	8
High	Q8BG32	16	26S proteasome non-ATPase regulatory subunit 11 OS=Mus musculus GN=Psmd11 PE=1 SV=3	8.23171e+06	6.4005e+06	84746517	7.64034e+07	8.22039e+07	Psmd11	47.4	11.0876	1		0	97.119	47	16	40	16	422	6.48	90.28	16	cell differentiation;cell organization and biogenesis;metabolic process	membrane;nucleus;proteasome	protein binding;structural molecule activity	Pf01399	69077	ENSMUSG00000017428.16	Psmd11	11	Proteasome; Epstein-Barr virus infection	Proteasome Degradation	The role of GTSE1 in G2/M progression after G2 checkpoint; CDT1 association with the CDC6:ORC:origin complex; Ubiquitin Mediated Degradation of Phosphorylated Cdc25A; RUNX1 regulates transcription of genes involved in differentiation of HSCs; Degradation of beta-catenin by the destruction complex; Autodegradation of the E3 ubiquitin ligase COP1; UCH proteinases; MAPK6/MAPK4 signaling; SCF-beta-Tr…	129
High	P70349	5	Histidine triad nucleotide-binding protein 1 OS=Mus musculus GN=Hint1 PE=1 SV=3	5.91652e+06	3.24808e+06	79958562	1.56396e+07	5.66512e+07	Hint1	13.8	11.0752	1		0	39.768	71	5	13	5	126	6.87	32.4	5	cell death;metabolic process;regulation of biological process;response to stimulus	cytoplasm;cytosol;membrane;nucleus	catalytic activity;nucleotide binding	Pf01230, Pf11969	15254	ENSMUSG00000020267.6	Hint1	11				0
High	Q9CXW3	9	Calcyclin-binding protein OS=Mus musculus GN=Cacybp PE=1 SV=1	1.71948e+07	7.26598e+06	1.88794e+08	4.78155e+07	1.69254e+08	Cacybp	26.5	11.0616	1	Met-loss+Acetyl [N-Term]	0	76.699	47	9	43	9	229	7.87	83.07	9	cell differentiation;regulation of biological process;response to stimulus	cytoplasm;cytosol;nucleus	protein binding	Pf04969, Pf05002, Pf09032	12301	ENSMUSG00000014226.10	Cacybp	1	Wnt signaling pathway			1
High	Q9Z0N1	15	Eukaryotic translation initiation factor 2 subunit 3, X-linked OS=Mus musculus GN=Eif2s3x PE=1 SV=2	1.74902e+07	6.91584e+06	1.97369e+08	1.05635e+08	1.01519e+08	Eif2s3x	51	11.0498	1	Met-loss+Acetyl [N-Term]	0	147.366	48	15	51	15	472	8.4	147.48	15	metabolic process	cytoplasm	catalytic activity;nucleotide binding;protein binding;RNA binding	Pf00009, Pf03144, Pf09173	26905	ENSMUSG00000035150.15	Eif2s3x	X	RNA transport	Translation Factors	L13a-mediated translational silencing of Ceruloplasmin expression; Recycling of eIF2:GDP; Ribosomal scanning and start codon recognition; GTP hydrolysis and joining of the 60S ribosomal subunit; ABC-family proteins mediated transport; Formation of the ternary complex, and subsequently, the 43S complex; Translation initiation complex formation	15
High	P61079	3	Ubiquitin-conjugating enzyme E2 D3 OS=Mus musculus GN=Ube2d3 PE=1 SV=1	6.75331e+06	6.08643e+06	1.08379e+08	3.94326e+07	6.46763e+07	Ube2d3	16.7	11.0328	1		0	65.165	36	3	19	3	147	7.8	54.75	3	cell death;metabolic process;response to stimulus	endosome;membrane	catalytic activity;nucleotide binding;protein binding	Pf00179, Pf14461	66105	ENSMUSG00000078578.9	Ube2d3	3	Ubiquitin mediated proteolysis; Protein processing in endoplasmic reticulum		E3 ubiquitin ligases ubiquitinate target proteins; Activated TLR4 signalling; Downregulation of SMAD2/3:SMAD4 transcriptional activity; Oxygen-dependent proline hydroxylation of Hypoxia-inducible Factor Alpha; Signaling by BMP; Neddylation; IKK complex recruitment mediated by RIP1	29
High	Q91YI0	10	Argininosuccinate lyase OS=Mus musculus GN=Asl PE=1 SV=1	1.59184e+06	1.03626e+06	28957860	4.63731e+06	9.87873e+06	Asl	51.7	11.028	1		0	86.55	35	10	14	10	464	6.96	44.48	10	metabolic process;response to stimulus	cytoplasm;endoplasmic reticulum;membrane;nucleus	catalytic activity;protein binding	Pf00206, Pf14698	109900	ENSMUSG00000025533.15	Asl	5	Metabolic pathways; Biosynthesis of amino acids; Alanine, aspartate and glutamate metabolism; Arginine biosynthesis	Alanine and aspartate metabolism		5
High	P46061	21	Ran GTPase-activating protein 1 OS=Mus musculus GN=Rangap1 PE=1 SV=2	4.80704e+06	1.07582e+07	8.11481e+07	1.27464e+08	4.75269e+07	Rangap1	63.5	10.9705	1		0	156.58	47	21	50	21	589	4.68	124.35	21	regulation of biological process;response to stimulus	chromosome;cytoplasm;cytoskeleton;cytosol;membrane;nucleus	enzyme regulator activity;protein binding;RNA binding	Pf07834, Pf13855	19387	ENSMUSG00000022391.15	Rangap1	15	RNA transport		Resolution of Sister Chromatid Cohesion; Amplification of signal from unattached kinetochores via a MAD2 inhibitory signal; Separation of Sister Chromatids; RHO GTPases Activate Formins; SUMOylation of DNA replication proteins	22
High	P62305	3	Small nuclear ribonucleoprotein E OS=Mus musculus GN=Snrpe PE=1 SV=1	4.91954e+06	559505	3.77929e+07	2.13954e+07	3.05111e+07	Snrpe	10.8	10.9142	1		0	43.741	52	3	16	3	92	9.44	53.33	3	cell organization and biogenesis;metabolic process	cytoplasm;cytosol;nucleus;spliceosomal complex	RNA binding	Pf01423	20643	ENSMUSG00000090553.8	Snrpe	1	Spliceosome	mRNA processing	mRNA Splicing - Minor Pathway; Cleavage of Growing Transcript in the Termination Region ; mRNA Splicing - Major Pathway; snRNP Assembly; SLBP Dependent Processing of Replication-Dependent Histone Pre-mRNAs; SLBP independent Processing of Histone Pre-mRNAs	16
High	Q3UGR5	4	Haloacid dehalogenase-like hydrolase domain-containing protein 2 OS=Mus musculus GN=Hdhd2 PE=1 SV=2	1.39468e+06	454774	1.97281e+07	1.31666e+06	9.17573e+06	Hdhd2	28.7	10.8935	1		0	30.297	26	4	12	4	259	6.05	33.06	4	metabolic process		catalytic activity;metal ion binding;protein binding	Pf00702, Pf13242, Pf13344, Pf13419	76987	ENSMUSG00000025421.14	Hdhd2	18				0
High	Q7TQI3	12	Ubiquitin thioesterase OTUB1 OS=Mus musculus GN=Otub1 PE=1 SV=2	1.04911e+07	9.52568e+06	1.65686e+08	5.12823e+07	1.09605e+08	Otub1	31.3	10.8766	1		0	150.293	67	12	50	12	271	4.94	112.1	12	metabolic process;regulation of biological process;response to stimulus	cytoplasm;nucleus	catalytic activity;protein binding	Pf02338, Pf10275	107260	ENSMUSG00000024767.11	Otub1	19			Ovarian tumor domain proteases; Ub-specific processing proteases	5
High	Q9JIF0	16	Protein arginine N-methyltransferase 1 OS=Mus musculus GN=Prmt1 PE=1 SV=1	1.37146e+07	9.16787e+06	148335478	1.1508e+08	1.09077e+08	Prmt1	42.4	10.8523	1		0	115.34	51	16	45	16	371	5.43	110.69	16	cell organization and biogenesis;metabolic process;regulation of biological process	cytoplasm;cytosol;membrane;nucleus	catalytic activity;DNA binding;nucleotide binding;protein binding;RNA binding	Pf05175, Pf06325, Pf08241, Pf12847, Pf13489, Pf13649, Pf13847	15469	ENSMUSG00000109324.1	Prmt1	7	FoxO signaling pathway; Glucagon signaling pathway	mRNA processing; Tryptophan metabolism	RUNX1 regulates genes involved in megakaryocyte differentiation and platelet function; RMTs methylate histone arginines	12
High	P48678	41	Prelamin-A/C OS=Mus musculus GN=Lmna PE=1 SV=2	1.23711e+08	1.24182e+08	1.86426e+09	9.06271e+08	1.26465e+09	Lmna	74.2	10.8519	1		0	373.668	64	42	230	41	665	6.98	556.17	42	cell organization and biogenesis;regulation of biological process;response to stimulus;transport	membrane;nucleus	protein binding;structural molecule activity	Pf00038, Pf00932, Pf12128	16905	ENSMUSG00000028063.15	Lmna	3	Hypertrophic cardiomyopathy (HCM); Arrhythmogenic right ventricular cardiomyopathy (ARVC); Dilated cardiomyopathy; Apoptosis	Adipogenesis genes; FAS pathway and Stress induction of HSP regulation	Clearance of Nuclear Envelope Membranes from Chromatin; Breakdown of the nuclear lamina; Depolymerisation of the Nuclear Lamina; Initiation of Nuclear Envelope Reformation	22
High	P97372	10	Proteasome activator complex subunit 2 OS=Mus musculus GN=Psme2 PE=1 SV=4	5.32721e+06	4.64887e+06	6.58285e+07	2.32557e+07	7.28753e+07	Psme2	27	10.8232	1		0	121.515	54	10	31	10	239	5.76	89.86	10	regulation of biological process	cytoplasm;membrane;proteasome	enzyme regulator activity;protein binding	Pf02251, Pf02252	19188; 621823	ENSMUSG00000079197.10; ENSMUSG00000078153.3	Psme2; Psme2b; Psme2b-ps	14; 11	Proteasome; Antigen processing and presentation	Proteasome Degradation	The role of GTSE1 in G2/M progression after G2 checkpoint; CDT1 association with the CDC6:ORC:origin complex; Ubiquitin Mediated Degradation of Phosphorylated Cdc25A; RUNX1 regulates transcription of genes involved in differentiation of HSCs; Degradation of beta-catenin by the destruction complex; Autodegradation of the E3 ubiquitin ligase COP1; UCH proteinases; MAPK6/MAPK4 signaling; SCF-beta-Tr…	128
High	Q9DBZ5	6	Eukaryotic translation initiation factor 3 subunit K OS=Mus musculus GN=Eif3k PE=1 SV=1	1.78655e+06	2.05083e+06	2.69598e+07	2.25528e+07	1.23791e+07	Eif3k	25.1	10.7524	1	Met-loss+Acetyl [N-Term]	0	35.128	39	6	17	6	218	4.93	30.81	6	metabolic process;regulation of biological process	cytoplasm;cytosol;membrane;nucleus	RNA binding	Pf03399, Pf10075	73830	ENSMUSG00000053565.10	Eif3k	7			Formation of a pool of free 40S subunits; L13a-mediated translational silencing of Ceruloplasmin expression; Ribosomal scanning and start codon recognition; Formation of the ternary complex, and subsequently, the 43S complex; Translation initiation complex formation; GTP hydrolysis and joining of the 60S ribosomal subunit	11
High	Q99MN1	26	Lysine--tRNA ligase OS=Mus musculus GN=Kars PE=1 SV=1	3.02547e+07	9.5227e+06	2.89798e+08	1.23937e+08	2.25864e+08	Kars	67.8	10.7197	1		0	212.998	58	26	93	26	595	5.94	219.03	26	metabolic process;regulation of biological process;response to stimulus	cytoplasm;cytosol;extracellular;membrane;mitochondrion;nucleus	catalytic activity;nucleotide binding;protein binding;RNA binding	Pf00152, Pf00587, Pf01336	85305	ENSMUSG00000031948.14	Kars	8	Aminoacyl-tRNA biosynthesis			1
High	Q61166	11	Microtubule-associated protein RP/EB family member 1 OS=Mus musculus GN=Mapre1 PE=1 SV=3	4.83469e+06	4.26883e+06	7.3572e+07	2.2169e+07	5.04787e+07	Mapre1	30	10.7079	1	Met-loss+Acetyl [N-Term]	0	69.158	56	11	25	11	268	5.22	59.56	11	cell division;regulation of biological process	cytoplasm;cytoskeleton;Golgi	protein binding;RNA binding	Pf00307, Pf03271	13589	ENSMUSG00000027479.14	Mapre1	2			Anchoring of the basal body to the plasma membrane; The role of GTSE1 in G2/M progression after G2 checkpoint; AURKA Activation by TPX2; Loss of Nlp from mitotic centrosomes; Recruitment of mitotic centrosome proteins and complexes; Regulation of PLK1 Activity at G2/M Transition; Recruitment of NuMA to mitotic centrosomes; Resolution of Sister Chromatid Cohesion; Amplification of signal from unat…	29
High	Q9D7G0	2	Ribose-phosphate pyrophosphokinase 1 OS=Mus musculus GN=Prps1 PE=1 SV=4	746190	1.21391e+06	14670178	6.64092e+06	9.91924e+06	Prps1	34.8	10.622	1		0	64.315	32	10	18	2	318	6.98	48.79	10	metabolic process		catalytic activity;metal ion binding;nucleotide binding;protein binding	Pf00156, Pf13793, Pf14572	19139	ENSMUSG00000031432.3	Prps1	X	Metabolic pathways; Biosynthesis of amino acids; Purine metabolism; Pentose phosphate pathway; Carbon metabolism	Purine metabolism; Nucleotide Metabolism	5-Phosphoribose 1-diphosphate biosynthesis	11
High	Q99PL5	19	Ribosome-binding protein 1 OS=Mus musculus GN=Rrbp1 PE=1 SV=2	2.79885e+06	4.15785e+06	5.95962e+07	5.96206e+06	4.44458e+07	Rrbp1	172.8	10.5418	1		0	139.714	16	19	27	19	1605	9.33	75.91	19	metabolic process;regulation of biological process;response to stimulus;transport	endoplasmic reticulum;membrane;ribosome	protein binding;receptor activity;structural molecule activity	Pf00038, Pf03276, Pf03962, Pf04111, Pf04156, Pf05104, Pf08317, Pf09606, Pf09726, Pf10186, Pf12128, Pf13779	81910		Rrbp1	2	Protein processing in endoplasmic reticulum			1
High	P21107	7	Tropomyosin alpha-3 chain OS=Mus musculus GN=Tpm3 PE=1 SV=3	4.60521e+06	1.70167e+07	1.05032e+08	9.23572e+07	1.44441e+08	Tpm3	33	10.5396	1		0	77.98	28	11	58	7	285	4.72	141.12	11	cell organization and biogenesis	cytoplasm;cytoskeleton;cytosol	protein binding;structural molecule activity	Pf00261, Pf12718	59069		Tpm3	3	Hypertrophic cardiomyopathy (HCM); Dilated cardiomyopathy; Pathways in cancer; Cardiac muscle contraction; Thyroid cancer; Adrenergic signaling in cardiomyocytes	Striated Muscle Contraction	Striated Muscle Contraction; Smooth Muscle Contraction	10
High	O70435	9	Proteasome subunit alpha type-3 OS=Mus musculus GN=Psma3 PE=1 SV=3	1.34757e+07	1.00795e+07	1.80567e+08	9.41597e+07	9.61422e+07	Psma3	28.4	10.4964	1	Met-loss+Acetyl [N-Term]	0	77.636	42	9	39	9	255	5.44	91.74	9	metabolic process;regulation of biological process	cytoplasm;cytosol;nucleus;proteasome	catalytic activity;protein binding	Pf00227, Pf10584	19167	ENSMUSG00000060073.9	Psma3	12	Proteasome	Proteasome Degradation	The role of GTSE1 in G2/M progression after G2 checkpoint; CDT1 association with the CDC6:ORC:origin complex; Ubiquitin Mediated Degradation of Phosphorylated Cdc25A; RUNX1 regulates transcription of genes involved in differentiation of HSCs; Degradation of beta-catenin by the destruction complex; Autodegradation of the E3 ubiquitin ligase COP1; UCH proteinases; MAPK6/MAPK4 signaling; SCF-beta-Tr…	127
High	Q9CY64	8	Biliverdin reductase A OS=Mus musculus GN=Blvra PE=1 SV=1	1.01397e+06	1.13792e+06	2.24545e+07	2.62709e+06	8.62266e+06	Blvra	33.5	10.4418	1		0	68.633	39	8	12	8	295	7.02	34.61	8	metabolic process	cytoplasm;cytosol	catalytic activity;metal ion binding;nucleotide binding	Pf01408, Pf09166	109778	ENSMUSG00000001999.15	Blvra	2	Porphyrin and chlorophyll metabolism		Heme degradation	4
High	Q9CYK2	9	Glutaminyl-peptide cyclotransferase OS=Mus musculus GN=Qpct PE=1 SV=2	5.11657e+06	1.539e+06	9.982e+07	1.42162e+06	2.64781e+06	Qpct	41.1	10.4063	1		0	75.199	42	9	20	9	362	6.92	50.05	9	metabolic process	extracellular	catalytic activity;metal ion binding	Pf04389	70536		Qpct	17				0
High	P00375	6	Dihydrofolate reductase OS=Mus musculus GN=Dhfr PE=1 SV=3	1.57485e+06	1.21766e+06	2.39928e+07	6.46676e+06	1.30662e+07	Dhfr	21.6	10.3911	1		0	40.023	43	6	11	6	187	8.53	22.13	6	cell organization and biogenesis;metabolic process;regulation of biological process;response to stimulus	cytoplasm;cytosol;mitochondrion	catalytic activity;nucleotide binding;RNA binding;translation regulator activity	Pf00186, Pf13768	13361	ENSMUSG00000021707.4	Dhfr	13	Metabolic pathways; Antifolate resistance; Folate biosynthesis; One carbon pool by folate	One carbon metabolism and related pathways; One Carbon Metabolism; Nucleotide Metabolism	Metabolism of folate and pterines	11
High	Q9Z1X4	18	Interleukin enhancer-binding factor 3 OS=Mus musculus GN=Ilf3 PE=1 SV=2	6.84486e+06	2.89445e+06	8.00024e+07	3.28593e+07	3.85462e+07	Ilf3	96	10.364	1		0	118.545	27	18	26	18	898	8.76	70.13	18	defense response;metabolic process;regulation of biological process;response to stimulus	cytoplasm;extracellular;membrane;mitochondrion;nucleus	DNA binding;protein binding;RNA binding	Pf00035, Pf07528, Pf14709	16201	ENSMUSG00000032178.14	Ilf3	9		mRNA processing		1
High	Q8BK64	15	Activator of 90 kDa heat shock protein ATPase homolog 1 OS=Mus musculus GN=Ahsa1 PE=1 SV=2	1.27092e+07	7.63506e+06	1.47186e+08	7.41085e+07	9.40726e+07	Ahsa1	38.1	10.3343	1		0	162.062	61	15	53	15	338	5.53	152.22	15	metabolic process;regulation of biological process;response to stimulus	cytoplasm;cytosol;endoplasmic reticulum	enzyme regulator activity;protein binding	Pf08327, Pf09229	217737	ENSMUSG00000021037.6	Ahsa1	12				0
High	O88543	9	COP9 signalosome complex subunit 3 OS=Mus musculus GN=Cops3 PE=1 SV=3	4.21488e+06	1.42272e+06	3.50094e+07	1.56175e+07	3.67574e+07	Cops3	47.8	10.3335	1	Met-loss+Acetyl [N-Term]	0	56.851	31	9	19	9	423	6.65	48.17	9	metabolic process	cytoplasm;cytosol;nucleus	protein binding	Pf01399	26572	ENSMUSG00000019373.11	Cops3	11		TNF-alpha NF-kB Signaling Pathway	DNA Damage Recognition in GG-NER; Neddylation; Formation of TC-NER Pre-Incision Complex; Cargo recognition for clathrin-mediated endocytosis	14
High	P06909	31	Complement factor H OS=Mus musculus GN=Cfh PE=1 SV=2	3.09552e+06	1.25287e+07	2.10689e+08	2.17977e+07	9.47292e+06	Cfh	139	10.3241	1		0	274.124	38	31	40	31	1234	6.99	134.26	31	defense response;metabolic process;regulation of biological process;response to stimulus	cytoplasm;extracellular;membrane;nucleus	protein binding	Pf00084	12628	ENSMUSG00000026365.15	Cfh	1	Staphylococcus aureus infection; Complement and coagulation cascades	Complement and Coagulation Cascades	Regulation of Complement cascade	7
High	Q8VDJ3	30	Vigilin OS=Mus musculus GN=Hdlbp PE=1 SV=1	3.57285e+06	8.29169e+06	7.93642e+07	3.14371e+07	7.24948e+07	Hdlbp	141.7	10.2994	1		0	187.972	32	30	45	30	1268	6.87	109.24	30	metabolic process;transport	cytoplasm;cytosol;membrane;nucleus	protein binding;RNA binding	Pf00013, Pf13014, Pf14611	110611	ENSMUSG00000034088.15	Hdlbp	1			HDL clearance	4
High	Q9CR21	3	Acyl carrier protein, mitochondrial OS=Mus musculus GN=Ndufab1 PE=1 SV=1	1.28103e+06	745054	1.69684e+07	1.74585e+06	1.24371e+07	Ndufab1	17.4	10.2501	1		0	20.14	15	3	7	3	156	5.21	18.38	3	cell organization and biogenesis;metabolic process;transport	cytosol;mitochondrion		Pf00550	70316	ENSMUSG00000030869.11	Ndufab1	7	Metabolic pathways; Huntington's disease; Non-alcoholic fatty liver disease (NAFLD); Oxidative phosphorylation; Parkinson's disease; Alzheimer's disease	Electron Transport Chain	Mitochondrial Fatty Acid Beta-Oxidation; Complex I biogenesis; Glyoxylate metabolism and glycine degradation	17
High	Q99MD9	20	Nuclear autoantigenic sperm protein OS=Mus musculus GN=Nasp PE=1 SV=2	8.74753e+06	1.01523e+07	1.32654e+08	7.30232e+07	8.48535e+07	Nasp	83.9	10.2481	1	Met-loss+Acetyl [N-Term]	0	195.239	41	20	50	20	773	4.37	157.31	20	cell organization and biogenesis;cell proliferation;metabolic process;transport	cytoplasm;nucleus	protein binding	Pf10516, Pf13414, Pf13424	50927		Nasp	4				0
High	Q3UM45	10	Protein phosphatase 1 regulatory subunit 7 OS=Mus musculus GN=Ppp1r7 PE=1 SV=2	2.33708e+06	2.46009e+06	3.68258e+07	8.79608e+06	2.79411e+07	Ppp1r7	41.3	10.2231	1		0	85.687	38	10	16	10	361	4.92	50.08	10	regulation of biological process	chromosome;nucleus	protein binding	Pf12799, Pf13855, Pf14580	66385	ENSMUSG00000026275.13	Ppp1r7	1				0
High	P84089	4	Enhancer of rudimentary homolog OS=Mus musculus GN=Erh PE=1 SV=1	6.87093e+06	9.04292e+06	128119983	3.71197e+07	7.48942e+07	Erh	12.3	10.0597	1	Met-loss+Acetyl [N-Term]	0	46.313	45	4	21	4	104	5.92	58.9	4	cell differentiation;metabolic process;regulation of biological process	membrane	DNA binding;nucleotide binding;RNA binding	Pf01133	13877	ENSMUSG00000021131.14; ENSMUSG00000063412.4	Erh	12; 8				0
High	Q6NSR8	6	Probable aminopeptidase NPEPL1 OS=Mus musculus GN=Npepl1 PE=1 SV=1	937334	927442	1.49092e+07	2.91936e+06	1.02381e+07	Npepl1	55.9	10.034	1	Met-loss+Acetyl [N-Term]	0	37.453	26	6	9	6	524	6.84	22.46	6	metabolic process	cytoplasm;nucleus	catalytic activity;metal ion binding	Pf00883	228961	ENSMUSG00000039263.16	Npepl1	2				0
High	Q60864	29	Stress-induced-phosphoprotein 1 OS=Mus musculus GN=Stip1 PE=1 SV=1	5.98359e+07	3.43505e+07	669478211	3.13336e+08	4.32372e+08	Stip1	62.5	10.0169	1		0	273.497	54	29	118	29	543	6.8	290.04	29		cytoplasm;cytosol;nucleus	protein binding;RNA binding	Pf00515, Pf07719, Pf13414, Pf13424, Pf13432	20867	ENSMUSG00000024966.8	Stip1	19	Prion diseases		HSP90 chaperone cycle for steroid hormone receptors (SHR)	4
